# Supplementary material for: Microbial next generation DNA sequencing of aspirated synovial fluid shows concordance with ICM criteria biomarkers for diagnosing periprosthetic joint infection in hip and knee arthroplasty
Source: Front Microbiol. 2026 May 11;17:1816780. doi: 10.3389/fmicb.2026.1816780 (PMC13199172; doi:10.3389/fmicb.2026.1816780)
Supplement: Supplementary file 3 [file Data_sheet_1.xlsx]

## Sheet: metadata
Sample	Prob	NGSresult	TAT	Res_genes	PCR	NGS_Bacteria	NGS_Fungi	Organisms	crp1	wbc1	pmn1	minor	Specimen_source	Sex	joint	CRP	WBC	PMN
1	Low	NEG	6.37986	None	None	None	None	0	1	0	0	1	R KNEE	M	Knee	21.08	75	17.4
2	High	POS	5.44236	None	None	Staphylococcus_epidermidis 95%; Lactobacillus_gasseri, 4%	None	2	0	3	2	5	R KNEE	F	Knee	5.18	13752	94.9
3	Low	POS	7.45556	None	None	Cutibacterium_acnes, 59%; Geodermatophilus_bullaregiensis, 40%	Aspergillus_vitricola, 87%; Epicoccum_nigrum, 5%	4	0	0	0	0	L KNEE	M	Knee	0.04	14	28.6
4	High	POS	5.45208	None	None	Capnocytophaga_canimorsus, 100%	None	1	0	3	2	5	L KNEE	F	Knee	1.1	11164	93.1
5	High	POS	3.36806	Methicillin	None	Staphylococcus_epidermidis 100%	None	1	0	3	2	5	L HIP	F	Hip	0.4	24982	97.4
6	Low	NEG	4.37083	None	None	None	None	0	0	0	0	0	L KNEE	F	Knee	0.35	28	17.8
7	High	POS	2.44861	None	None	Streptococcus_dysgalactiae, 100%	None	1	1	3	2	6	L KNEE	M	Knee	39.52	11461	94
8	Low	NEG	4.31806	None	None	None	None	0	0	0	0	0	L KNEE	F	Knee	0.01	263	57
9	Low	NEG	5.38264	None	None	None	None	0	0	0	0	0	R KNEE	F	Knee	0.14	296	49.3
10	High	POS	5.38125	None	None	Streptococcus_parasanguinis, 99%	None	1	1	3	2	6	L HIP	F	Hip	43.57	24329	92.4
11	High	NEG	5.37917	None	None	None	None	0	0	3	2	5	L KNEE	M	Knee	4.7	3158	96
12	Low	NEG	6.42917	None	None	None	None	0	0	0	0	0	R KNEE	M	Knee	2.47	245	79.6
13	High	POS	6.41389	Methicillin	None	Staphylococcus_epidermidis 78%; Staphylococcus_lugdunensis, 21%	None	2	1	3	2	6	R KNEE	M	Knee	24.08	6756	96.2
14	Low	NEG	6.41319	None	Streptococcus_agalactiae	None	None	1	0	0	0	0	L KNEE	M	Knee	1.52	16	12.4
15	Low	NEG	6.4125	None	None	None	None	0	1	0	2	3	L KNEE	F	Knee	11.81	725	94.2
16	Low	NEG	6.41181	None	None	None	None	0	0	0	0	0	R HIP	F	Hip	0.44	281	61.2
17	Low	POS	6.41875	Methicillin	None	Staphylococcus_epidermidis 100%	None	1	0	0	0	0	R KNEE	M	Knee	0.08	218	52.3
18	High	NEG	6.41667	None	None	None	None	0	1	3	2	6	L HIP	F	Hip	10.14	4968	95.7
19	High	NEG	6.41597	None	None	None	None	0	1	3	2	6	L KNEE	M	Knee	8.95	3418	95
20	Low	NEG	6.41458	None	None	None	None	0	0	0	0	0	R KNEE	M	Knee	0.36	175	77.2
21	Low	NEG	6.41389	None	None	None	None	0	1	0	2	3	L KNEE	M	Knee	29.18	626	90.2
22	Low	NEG	6.40347	None	None	None	None	0	0	0	0	0	L KNEE	F	Knee	1.24	486	12.1
23	Low	POS	5.39236	None	None	Cutibacterium_acnes, 86%; Staphylococcus_epidermidis 8%; Staphylococcus_auricularis, 4%	None	3	0	0	0	0	R KNEE	F	Knee	0.01	163	27
24	Low	POS	5.39167	None	None	Cutibacterium_acnes, 72%; Staphylococcus_epidermidis 8%; Staphylococcus_auricularis, 3%	None	3	0	0	0	0	R KNEE	F	Knee	0.01	229	62
25	Low	NEG	2.31667	None	None	None	None	0	0	0	0	0	R KNEE	F	Knee	0.05	9	11.1
26	Low	NEG	2.31597	None	None	None	None	0	0	0	0	0	L KNEE	F	Knee	0.14	60	28.3
27	Low	NEG	2.31389	None	None	None	None	0	0	0	0	0	R KNEE	F	Knee	3.78	29	13.8
28	Low	POS	3.44097	None	None	Staphylococcus_capitis, 96%; Corynebacterium_tuberculostearicum, 3%	None	2	0	0	0	0	R HIP	M	Hip	0.75	272	60
29	High	POS	3.43472	Methicillin	None	Staphylococcus_epidermidis 100%	None	1	0	3	2	5	L KNEE	F	Knee	4.92	16338	96.3
30	High	POS	1.43681	Methicillin, Aminoglycoside	None	Staphylococcus_epidermidis 100%	None	1	0	3	2	5	R KNEE	F	Knee	4.4	6273	97.8
31	Low	NEG	1.43611	None	None	None	None	0	1	0	0	1	R HIP	F	Hip	18	45	37.8
32	Low	NEG	1.43542	None	None	None	None	0	0	0	0	0	R KNEE	F	Knee	0.03	61	9.9
33	High	POS	1.43333	None	Staphylococcus_aureus_x000D_	Staphylococcus_aureus, 99%	None	1	0	3	2	5	R KNEE	M	Knee	2.55	11689	97.3
34	Low	NEG	3.4375	None	None	None	None	0	0	0	0	0	L KNEE	F	Knee	2.13	719	48.7
35	Low	NEG	3.43542	None	None	None	None	0	0	0	0	0	L KNEE	M	Knee	3.08	246	64.2
36	Low	NEG	3.43403	None	None	None	None	0	0	0	0	0	L KNEE	M	Knee	0.23	155	37.5
37	Low	POS	3.43125	Methicillin	None	Staphylococcus_epidermidis 98%	None	1	0	0	0	0	L HIP	F	Hip	2.75	281	64.4
38	Low	NEG	3.43542	None	None	None	None	0	0	0	0	0	R KNEE	M	Knee	0.37	57	45.6
39	Low	NEG	4.37639	None	None	None	None	0	0	0	0	0	L KNEE	F	Knee	0.62	107	18.7
40	Low	NEG	4.37569	None	None	None	None	0	0	0	0	0	R HIP	F	Hip	0.59	524	34.1
41	Low	NEG	4.375	None	None	None	None	0	0	0	0	0	L KNEE	F	Knee	0.03	181	8.3
42	High	NEG	2.42361	None	None	None	None	0	1	3	2	6	R KNEE FL	F	Knee	25.29	30727	97.5
43	Low	NEG	2.42083	None	None	None	None	0	0	0	0	0	R KNEE FL	M	Knee	0.42	242	74
44	High	POS	2.39653	None	None	Streptococcus_mitis, 100%	None	1	1	3	2	6	R KNEE	M	Knee	132.98	33236	96.9
45	Low	NEG	7.40903	None	None	None	None	0	0	0	0	0	R KNEE	M	Knee	0.38	25	16
46	Low	NEG	7.40764	None	None	None	None	0	0	0	0	0	L HIP	F	Hip	0.04	49	44.9
47	Low	NEG	7.41736	None	None	None	None	0	0	0	0	0	R HIP + SW	F	Hip	0.05	261	9.2
48	Low	NEG	3.42153	None	None	None	None	0	0	0	0	0	L KNEE	M	Knee	0.06	8	25
49	High	POS	4.41389	None	None	Staphylococcus_capitis, 88%	None	1	0	3	2	5	L HIP	M	Hip	0.12	8606	93.4
50	High	NEG	7.41042	None	None	None	None	0	1	3	2	6	L KNEE + SW	M	Knee	9.44	11917	97.1
51	High	POS	4.40833	None	None	Gemella_morbillorum, 88%	None	1	1	3	2	6	L HIP	M	Hip	14.8	33056	95.7
52	Low	NEG	6.47153	None	None	None	None	0	0	0	0	0	R HIP	F	Hip	0.63	105	37.1
53	Low	NEG	4.47083	None	None	None	None	0	0	0	0	0	R KNEE	M	Knee	0.25	135	53.4
54	Low	NEG	5.46875	None	None	None	None	0	0	0	0	0	R KNEE	M	Knee	0.98	19	26.3
55	High	NEG	5.46528	None	None	None	None	0	1	3	2	6	R KNEE	F	Knee	17.85	5374	97.9
56	Low	NEG	3.40417	None	None	None	None	0	1	0	0	1	R KNEE	F	Knee	23.48	97	54.7
57	Low	NEG	6.42361	None	None	None	None	0	0	0	0	0	L KNEE FAILED IMPLANT	F	Knee	0.03	146	15.8
58	Low	NEG	3.42222	None	None	None	None	0	0	0	0	0	R KNEE	M	Knee	0.21	17	17.6
59	High	POS	3.41736	None	None	Streptococcus_parasanguinis, 91%	None	1	1	3	2	6	L HIP	F	Hip	40.21	14898	93.7
60	High	POS	3.41597	None	Pseudomonas_aeruginosa	Pseudomonas_aeruginosa, 85%	None	1	1	3	2	6	L KNEE + SWAB	F	Knee	25.59	131440	95.1
61	Low	NEG	4.42778	None	None	None	None	0	0	0	0	0	L KNEE	F	Knee	0.52	1	0
62	Low	NEG	4.42361	None	None	None	None	0	0	0	0	0	L HIP	F	Hip	0.01	61	21.3
63	High	NEG	2.47292	None	None	None	None	0	1	3	2	6	L KNEE	F	Knee	7.7	3043	93.1
64	Low	NEG	2.47222	None	None	None	None	0	1	0	0	1	L HIP	M	Hip	8.41	199	62.3
65	Low	NEG	2.47153	None	None	None	None	0	1	0	0	1	L KNEE	M	Knee	13.86	322	66.5
66	Low	POS	9.42292	None	None	Cutibacterium_acnes, 60%; Enterobacter_cloacae, 39%	None	2	0	0	0	0	L KNEE	M	Knee	1.79	30	20
67	Low	NEG	2.42014	None	None	None	None	0	0	0	0	0	L KNEE	M	Knee	0.03	82	17.1
68	Low	NEG	2.41806	None	None	None	None	0	1	0	2	3	R KNEE	F	Knee	10.34	596	81.6
69	Low	NEG	7.41389	None	None	None	None	0	0	0	0	0	R KNEE TISSUE	M	Knee	0.06	3	0
70	Low	NEG	7.41181	None	None	None	None	0	0	0	0	0	R KNEE	F	Knee	0.07	22	9.1
71	Low	NEG	7.40764	None	None	None	None	0	0	0	0	0	L KNEE	F	Knee	0.03	48	27.1
72	Low	NEG	7.40625	None	None	None	None	0	0	0	0	0	R KNEE	M	Knee	0.02	441	8.2
73	Low	NEG	7.40486	None	None	None	None	0	0	0	0	0	R KNEE	M	Knee	1.95	162	59.9
74	Low	NEG	7.40417	None	None	None	None	0	0	0	0	0	R KNEE	M	Knee	0.06	476	72.7
75	Low	NEG	7.40208	None	None	None	None	0	0	0	0	0	L KNEE FLUID	F	Knee	0.52	200	44.5
76	Low	NEG	7.43403	None	None	None	None	0	0	0	0	0	L KNEE	F	Knee	3.13	521	64.1
77	Low	NEG	7.43333	None	None	None	None	0	0	0	0	0	L HIP + SWAB	M	Hip	3.58	304	58.5
78	Low	NEG	7.43125	None	None	None	None	0	0	0	0	0	L KNEE	F	Knee	1.01	63	33.4
79	Low	NEG	7.43056	None	None	None	None	0	0	0	0	0	R KNEE	M	Knee	0.01	251	49.1
80	Low	NEG	7.42917	None	None	None	None	0	0	0	0	0	L KNEE	M	Knee	0.02	90	42.3
81	Low	NEG	7.42847	None	None	None	None	0	0	0	0	0	L KNEE	M	Knee	0.95	24	25
82	Low	NEG	7.42708	None	None	None	None	0	0	0	0	0	L KNEE	M	Knee	0.5	12	25
83	Low	NEG	7.42708	None	None	None	None	0	0	0	0	0	L HIP	F	Hip	0.17	208	35.5
84	Low	NEG	2.34167	None	None	None	None	0	0	0	0	0	L HIP FLUID	M	Hip	1.27	118	24.5
85	High	NEG	2.33819	None	None	None	None	0	0	3	2	5	R KNEE FLUID	F	Knee	2.84	3370	96.5
86	High	POS	2.36181	Methicillin	None	Staphylococcus epidermidis 88%	None	1	0	3	2	5	R KNEE FLUID + SWAB	M	Knee	0.14	12667	94.9
87	Low	NEG	2.36042	None	None	None	None	0	0	0	0	0	R KNEE	F	Knee	0.03	806	47.7
88	Low	NEG	2.45486	None	None	None	None	0	0	0	0	0	R KNEE	M	Knee	0.63	247	65.6
89	Low	NEG	2.45417	None	None	None	None	0	0	0	0	0	L KNEE	M	Knee	0.08	67	16.4
90	Low	NEG	2.44097	None	None	None	None	0	0	0	0	0	L KNEE	F	Knee	1.49	392	39.1
91	Low	NEG	2.44583	None	None	None	None	0	0	0	0	0	L KNEE	M	Knee	4.37	38	34.2
92	Low	NEG	3.45208	None	None	None	None	0	0	0	0	0	R KNEE	F	Knee	0.01	254	77.2
93	High	NEG	3.45139	None	None	None	None	0	1	3	2	6	R KNEE	F	Knee	12.75	4276	96.2
94	Low	NEG	3.46875	None	None	None	None	0	0	0	0	0	L KNEE	M	Knee	0	8	0
95	Low	NEG	3.46319	None	None	None	None	0	0	0	0	0	L KNEE	M	Knee	2.49	87	41.4
96	Low	NEG	3.46111	None	None	None	None	0	0	0	0	0	R HIP	M	Hip	0.41	112	43.7
97	Low	NEG	3.45903	None	None	None	None	0	0	0	0	0	R KNEE	F	Knee	0.21	161	31
98	Low	NEG	2.41528	None	None	None	None	0	0	0	0	0	R KNEE ASPIRATE	F	Knee	0.02	58	56.9
99	High	POS	2.40972	None	None	Streptococcus_gordonii, 97%	None	1	1	3	2	6	L KNEE	F	Knee	17.87	48090	89
100	Low	NEG	2.40694	None	None	None	None	0	1	0	0	1	L KNEE	F	Knee	20.07	194	58.3
101	High	POS	2.40625	None	None	Pseudomonas_aeruginosa, 89%	None	1	1	3	2	6	R KNEE	F	Knee	36.18	3802	92
102	Low	NEG	2.45972	None	None	None	None	0	0	0	0	0	R KNEE SWAB	M	Knee	0.23	304	28.6
103	Low	NEG	1.36528	None	None	None	None	0	0	0	0	0	RIGHT KNEE	M	Knee	0.01	39	41
104	Low	NEG	1.35208	None	None	None	None	0	0	0	0	0	R KNEE	F	Knee	0.1	9	11.1
105	Low	NEG	1.34931	None	None	None	None	0	0	0	0	0	R HIP ASPIRATE	M	Hip	5.02	17	17.7
106	Low	NEG	1.34514	None	None	None	None	0	0	0	0	0	L KNEE	F	Knee	1.35	11	9.1
107	Low	NEG	3.31944	None	None	None	None	0	0	0	0	0	L KNEE	M	Knee	0.2	17	17.7
108	Low	NEG	3.31806	None	None	None	None	0	0	0	0	0	R KNEE	F	Knee	0.48	16	43.7
109	Low	POS	3.32639	None	None	Corynebacterium_segmentosum, 42%; Cutibacterium_acnes, 25%; Staphylococcus_epidermidis 12%; Pseudomonas_putida, 9%; Corynebacterium_propinquum, 6%; Dolosigranulum_pigrum, 3%	None	6	0	0	0	0	L KNEE	M	Knee	0.15	54	24.1
110	High	POS	3.30764	Methicillin	None	Staphylococcus_epidermidis 98%	None	1	1	3	2	6	R KNEE	M	Knee	32.29	11751	96.9
111	Low	NEG	3.30694	None	None	None	None	0	0	0	0	0	R KNEE	F	Knee	0.43	657	42
112	Low	NEG	3.30486	None	None	None	None	0	1	0	0	1	L KNEE	M	Knee	94	208	57.3
113	High	POS	3.30278	None	None	Streptococcus_gordonii,_99%	None	1	0	3	2	5	L KNEE ASPIRATE	F	Knee	0.69	18669	96.1
114	Low	NEG	3.31944	None	None	None	None	0	0	0	0	0	LEFT KNEE + SW	M	Knee	1.16	4	75
115	Low	NEG	3.3125	None	None	None	None	0	0	0	0	0	L KNEE	M	Knee	5.78	1805	77
116	Low	NEG	2.38542	None	None	None	None	0	1	0	2	3	L KNEE	F	Knee	23.51	2821	95.8
117	Low	NEG	2.38403	None	None	None	None	0	0	0	0	0	L KNEE	F	Knee	0.13	31	32.3
118	High	POS	2.38333	None	None	Staphylococcus_capitis, 100%	None	1	0	3	2	5	L HIP	M	Hip	1.06	8776	95.5
119	Low	NEG	2.38819	None	None	None	None	0	0	0	0	0	R KNEE	M	Knee	1.6	41	14.6
120	Low	NEG	2.43542	None	None	None	None	0	0	0	0	0	R KNEE SYNOVIAL FLUID + SWX2	M	Knee	0.36	28	25
121	High	POS	2.39792	None	Streptococcus_pyogenes, Staphylococcus_aureus	Streptococcus_pyogenes, 64%;Staphylococcus_aureus, 21%;Peptoniphilus_indolicus, 13%	None	3	1	3	2	6	R HIP	M	Hip	36.56	22450	95.9
122	Low	NEG	3.41528	None	None	None	None	0	0	0	0	0	R HIP	F	Hip	0.05	126	38.9
123	High	NEG	3.41319	None	None	None	None	0	1	3	2	6	L KNEE	M	Knee	16.42	14259	94.7
124	Low	NEG	3.41111	None	None	None	None	0	0	0	0	0	R KNEE	M	Knee	5.14	396	69.7
125	Low	POS	3.40972	Aminoglycoside	None	Staphylococcus_lugdunensis, 89%	None	1	1	0	2	3	R KNEE	M	Knee	22.14	2132	95.7
126	Low	NEG	3.40903	None	None	None	None	0	1	0	2	3	R KNEE	F	Knee	12.18	457	84.3
127	Low	NEG	2.38403	None	None	None	None	0	0	3	0	3	R HIP SWX2+T+FL 3ML	M	Hip	0.53	5949	36
128	Low	NEG	2.38264	None	None	None	None	0	0	0	0	0	R KNEE	F	Knee	0.02	6	33.3
129	Low	NEG	2.38056	None	None	None	None	0	0	0	0	0	R KNEE	M	Knee	0.12	19	16.3
130	High	POS	2.37917	None	None	Staphylococcus_epidermidis 100%	None	1	0	3	2	5	R KNEE SW+FL 7ML	F	Knee	5.97	11639	94.4
131	Low	POS	3.47986	None	None	None	Candida_parapsilosis,_98%	1	0	0	0	0	L KNEE	M	Knee	5.89	391	68.3
132	Low	NEG	3.47917	None	None	None	None	0	0	0	0	0	R HIP	F	Hip	0.04	197	23.3
133	Low	NEG	7.47847	None	None	None	None	0	0	0	0	0	L KNEE	F	Knee	0.22	61	16.4
134	Low	NEG	3.47639	None	None	None	None	0	0	0	0	0	L KNEE	M	Knee	0.26	58	5.2
135	Low	NEG	2.47361	None	None	None	None	0	0	0	2	2	L KNEE + FL 0.5+SW	M	Knee	2.55	112	81.2
136	Low	NEG	2.46667	None	None	None	None	0	0	0	0	0	R KNEE	M	Knee	0.21	76	19.7
137	High	NEG	4.42778	None	None	None	None	0	1	3	2	6	R HIP SW+ 4ML	F	Hip	14.7	75644	90.5
138	High	POS	4.42569	None	None	None	Malassezia_globosa, 73%; Malassezia_restricta, 26%	2	1	3	2	6	L KNEE	F	Knee	18.77	3193	90.7
139	Low	NEG	4.425	None	None	None	None	0	1	0	2	3	L KNEE	M	Knee	18.15	1092	83.3
140	High	POS	4.42431	Methicillin	None	Staphylococcus_epidermidis 78%; Rothia_amarae, 14%; Staphylococcus_warneri, 5%	None	3	1	3	2	6	R KNEE	M	Knee	10.96	13560	95.7
141	High	POS	7.42292	Methicillin	None	Staphylococcus_epidermidis 99%	None	1	1	3	2	6	R KNEE	M	Knee	27.27	9530	95.7
142	Low	NEG	4.42222	None	None	None	None	0	1	0	0	1	R KNEE	M	Knee	12.09	770	56.4
143	High	NEG	4.43958	None	Cutibacterium_acnes	None	None	1	1	3	0	4	R KNEE	F	Knee	14.65	4515	57.3
144	Low	NEG	4.43819	None	None	None	None	0	0	0	0	0	L KNEE	M	Knee	3.01	1480	60.7
145	Low	NEG	4.43472	None	None	None	None	0	0	0	0	0	L KNEE	M	Knee	1.56	119	29.4
146	Low	NEG	4.43194	None	None	None	None	0	0	0	0	0	R KNEE	M	Knee	1.1	1721	79.6
147	Low	NEG	3.41597	None	None	None	None	0	0	0	0	0	R KNEE	M	Knee	0.04	257	17.1
148	High	NEG	3.41528	None	None	None	None	0	1	3	2	6	L KNEE + SWAB	M	Knee	9.3	3979	89.8
149	Low	NEG	3.41319	None	None	None	None	0	0	0	0	0	L KNEE	M	Knee	0.08	43	34.9
150	Low	NEG	3.41181	None	None	None	None	0	0	0	0	0	R KNEE FL + SWAB	F	Knee	1.22	228	12.7
151	High	POS	3.40625	None	Staphylococcus_aureus_x000D_	Staphylococcus_aureus, 99%	None	1	1	3	2	6	R KNEE	M	Knee	8.97	17473	96.4
152	Low	NEG	3.41319	None	None	None	None	0	0	0	0	0	L KNEE	M	Knee	0.65	504	57.5
153	Low	NEG	3.41111	None	None	None	None	0	0	0	0	0	L KNEE	F	Knee	6.11	18	11.1
154	Low	NEG	2.42222	None	None	None	None	0	0	0	0	0	L KNEE	F	Knee	1.66	392	21.7
155	Low	NEG	2.41667	None	None	None	None	0	1	0	0	1	L HIP	F	Hip	16.56	189	27.5
156	Low	NEG	2.41597	None	None	None	None	0	0	0	0	0	R KNEE	F	Knee	0.36	55	10.9
157	Low	NEG	2.41458	None	None	None	None	0	0	0	0	0	R HIP	F	Hip	3.42	162	53.7
158	High	POS	2.40694	Methicillin, Aminoglycoside	None	Staphylococcus_epidermidis 100%	None	1	1	3	2	6	L KNEE + SW	F	Knee	91.15	6039	87.6
159	Low	NEG	2.40486	None	None	None	None	0	0	0	0	0	R KNEE	M	Knee	0.18	20	25
160	Low	NEG	3.41458	None	None	None	None	0	0	0	0	0	L KNEE	M	Knee	0.1	16	18.7
161	Low	NEG	3.41389	None	None	None	None	0	0	0	0	0	L KNEE	M	Knee	1.88	23	30.4
162	Low	NEG	3.4125	None	None	None	None	0	1	0	0	1	R KNEE	M	Knee	11.42	162	18.6
163	Low	NEG	3.40764	None	None	None	None	0	0	0	0	0	R KNEE + SW	M	Knee	0.66	83	38.6
164	High	NEG	3.40486	None	None	None	None	0	1	3	2	6	L HIP +SW	M	Hip	23.79	10543	80.4
165	Low	NEG	3.42639	None	None	None	None	0	0	0	2	2	L KNEE	M	Knee	0.02	605	81.9
166	Low	NEG	4.35764	None	None	None	None	0	0	0	0	0	R KNEE FLUID + SW	F	Knee	0.02	15	13.4
167	High	POS	5.35556	None	None	Gemella_haemolysans, 100%	None	1	1	3	2	6	R KNEE	F	Knee	7.24	17852	96
168	High	POS	5.33125	None	None	Escherichia_coli, 98%	None	1	1	3	2	6	R KNEE FLUID + SW	M	Knee	21.18	101741	96.8
169	High	POS	5.32083	Methicillin	None	Staphylococcus_epidermidis 100%	None	1	0	3	2	5	R KNEE FLUID + SW	F	Knee	6.39	49797	94.2
170	High	NEG	5.31875	None	None	None	None	NA	1	3	2	6	R KNEE	F	Knee	7.38	4159	94
171	High	NEG	5.31736	None	None	None	None	NA	1	3	2	6	R KNEE	M	Knee	37.33	30215	94.2
172	High	NEG	5.31319	None	None	None	None	NA	1	3	2	6	L KNEE SW + FLUID	M	Knee	97.27	3044	91.2
173	High	POS	1.43611	Methicillin, Aminoglycoside	None	Staphylococcus_epidermidis 99%	None	1	0	3	2	5	R KNEE	F	Knee	4.96	14614	95.3
174	Low	POS	5.43333	None	None	Streptococcus_mutans, 76%	None	1	0	0	0	0	R TKA	M	Knee	0.06	1429	41.8
175	High	POS	5.42917	None	None	Streptococcus_mutans, 98%	None	1	0	3	2	5	R KNEE SWAB + FLUID	F	Knee	0.7	4543	95.1
176	Low	NEG	3.39861	NA	None	None	None	0	0	0	0	0	L KNEE	M	Knee	0.44	336	9.8
177	Low	NEG	3.39722	NA	None	None	None	0	0	0	0	0	R KNEE	F	Knee	0.15	48	39.6
178	Low	NEG	3.39514	NA	None	None	None	NA	0	0	0	0	R KNEE	M	Knee	0.84	15	20
179	Low	NEG	3.39306	NA	None	None	None	NA	0	0	0	0	L KNEE	M	Knee	0.04	85	50.6
180	Low	NEG	3.39236	NA	None	None	None	0	0	0	0	0	R KNEE FL 19ML	F	Knee	0.45	127	31.5
181	Low	POS	6.39167	None	None	Staphylococcus_aureus, 100%	None	1	0	0	0	0	L KNEE	M	Knee	1.52	28	50
182	Low	NEG	3.38472	NA	None	None	None	NA	1	0	0	1	L KNEE	F	Knee	19.8	476	55.8
183	High	POS	6.38403	None	None	Pseudomonas_aeruginosa, 98%	None	1	1	3	2	6	R KNEE	F	Knee	46.5	10199	87.1
184	High	NEG	3.41458	None	None	None	None	NA	0	3	2	5	L KNEE	F	Knee	1.04	4165	83
185	High	POS	3.41181	Methicillin	None	Staphylococcus_epidermidis 92%	None	1	1	3	2	6	R KNEE	M	Knee	15.03	8409	95.4
186	Low	NEG	3.39583	NA	None	None	None	NA	0	0	0	0	R KNEE FLUID	F	Knee	0.13	965	31
187	Low	NEG	3.39306	NA	None	None	None	NA	0	0	0	0	L KNEE	F	Knee	0.41	467	55.4
188	Low	NEG	4.42569	NA	None	None	None	0	0	0	0	0	R HIP	M	Hip	3.17	168	20.8
189	High	NEG	4.41806	None	None	None	None	NA	0	3	2	5	R HIP	F	Hip	3	11228	92
190	Low	NEG	4.41667	NA	None	None	None	NA	0	0	0	0	R KNEE SWAB AND FLUID	F	Knee	6.64	1946	63.7
191	Low	NEG	4.41458	NA	None	None	None	0	1	0	0	1	R KNEE	M	Knee	7.47	546	65.4
192	High	POS	5.42153	None	None	Streptococcus_mitis, 99%	None	1	1	3	2	6	R KNEE T + SW	M	Knee	77.29	16200	95.1
193	Low	NEG	2.41597	NA	None	None	None	NA	1	0	0	1	R KNEE + SW	F	Knee	7.39	182	46.2
194	Low	NEG	6.43958	NA	None	None	None	NA	0	0	0	0	RT KNEE	F	Knee	0.15	31	25.8
195	Low	NEG	6.37708	NA	None	None	None	NA	0	0	0	0	L KNEE	F	Knee	1.35	97	12.4
196	Low	NEG	6.37361	NA	None	None	None	NA	0	0	0	0	L KNEE	F	Knee	2.09	656	44.5
197	Low	NEG	6.38889	None	None	None	None	NA	0	0	0	0	L HIP	F	Hip	4.33	21	57.2
198	Low	NEG	6.3875	NA	None	None	None	NA	0	0	2	2	R HIP FLUID	F	Hip	0.01	1	100
199	Low	NEG	2.39931	NA	None	None	None	NA	0	0	0	0	R KNEE + SWAB	F	Knee	0.38	8	0
200	High	POS	17.3965	Methicillin, Aminoglycoside	None	Staphylococcus_epidermidis 99%	None	1	0	3	2	5	L KNEE	M	Knee	2.93	120941	94.4
201	Low	NEG	5.39444	NA	None	None	None	NA	0	0	2	2	L KNEE	M	Knee	0.43	2	100
202	Low	NEG	5.39375	NA	None	None	None	NA	0	0	2	2	L KNEE	M	Knee	2.93	26	92.4
203	High	POS	1.48264	None	None	Streptococcus_parasanguinis, 100%	None	1	1	3	2	6	L KNEE FLUID	F	Knee	51.6	13030	93.9
204	Low	NEG	13.425	NA	None	None	None	NA	0	0	0	0	R KNEE	F	Knee	0.05	134	27.6
205	High	NEG	6.34375	NA	None	None	None	NA	0	3	2	5	R HIP	M	Hip	6.43	4676	89.4
206	Low	NEG	6.39931	NA	None	None	None	NA	0	0	0	0	L KNEE	M	Knee	0.03	18	16.6
207	Low	NEG	6.39861	NA	None	None	None	NA	0	0	0	0	R KNEE	F	Knee	1.97	13	15.4
208	Low	NEG	6.39583	NA	None	None	None	NA	1	0	0	1	R KNEE FLUID + SWAB	M	Knee	15.11	1122	60.9
209	Low	NEG	6.39444	NA	None	None	None	NA	0	0	0	0	R KNEE	F	Knee	0.93	802	56.5
210	Low	NEG	6.38958	NA	None	None	None	NA	0	0	0	0	R KNEE	F	Knee	0.03	263	42.6
211	High	POS	3.39167	Methicillin	None	Staphylococcus_epidermidis 98%	None	1	1	3	2	6	R KNEE	M	Knee	17.19	7858	96.2
212	High	POS	3.39028	None	None	Staphylococcus_capitis, 93%	None	NA	1	3	2	6	L HIP FL 6ML+ SW	M	Hip	27.22	24944	94.5
213	Low	NEG	6.38611	NA	None	None	None	NA	1	0	0	1	R KNEE	M	Knee	29.94	1526	63.1
214	Low	NEG	6.38125	NA	None	None	None	NA	0	0	0	0	L KNEE EFFUSION SWX2 + FL 5ML	M	Knee	0.19	215	10.2
215	Low	POS	3.37847	None	None	Neisseria_subflava, 13%; Haemophilus_parainfluenzae, 12%; Neisseria_oralis, 7%; Granulicatella_adiacens, 7%; Lautropia_mirabilis, 6%; Fusobacterium_periodonticum, 5%; Capnocytophaga_sputigena, 4%; Rothia_sp, 3%; Fusobacterium_nucleatum, 3%; Veillonella_dispar, 3%; Neisseria_sp , 2%; Streptococcus_cristatus, 2%	None	1	0	0	0	0	L KNEE	M	Knee	0.03	47	21.3
216	Low	NEG	6.3875	NA	None	None	None	NA	0	0	0	0	R KNEE	M	Knee	0.02	41	73.2
217	Low	NEG	6.38611	NA	None	None	None	NA	0	0	0	0	L KNEE	F	Knee	0.35	965	79.7
218	Low	NEG	6.38472	NA	None	None	None	NA	0	0	2	2	L KNEE	M	Knee	1.58	268	80.6
219	Low	NEG	5.43958	NA	None	None	None	NA	1	0	0	1	L KNEE	M	Knee	9.03	513	72.3
220	Low	NEG	5.4375	NA	None	None	None	NA	0	0	0	0	R KNEE +SW	F	Knee	0.09	349	9.8
221	Low	NEG	4.43125	NA	None	None	None	NA	0	0	0	0	R KNEE +SW	M	Knee	0.6	1788	74.3
222	High	POS	4.42431	None	None	Streptococcus_oralis, 72%; Streptococcus_mitis, 27%	None	2	1	3	2	6	R KNEE	F	Knee	36.54	48283	96.2
223	High	POS	4.41944	None	Staphylococcus_aureus_x000D_	Staphylococcus_aureus, 98%	None	1	1	3	2	6	L KNEE	M	Knee	16.27	46167	97.2
224	High	NEG	2.46528	None	None	None	None	NA	1	3	0	4	R KNEE	F	Knee	14.56	5918	53.9
225	High	NEG	2.43611	NA	None	None	None	NA	1	3	2	6	R KNEE FLUID	M	Knee	13.72	3703	89.7
226	Low	NEG	2.45694	NA	None	None	None	NA	0	0	0	0	R HIP	F	Hip	1.84	179	58.6
227	High	POS	3.41806	None	None	Staphylococcus_lugdunensis, 84%; Enterococcus_cecorum, 3%; Pseudoclavibacter_soli, 3%	None	3	1	3	2	6	R KNEE	M	Knee	85.43	59315	91.5
228	Low	NEG	3.42083	NA	None	None	None	NA	0	0	0	0	L KNEE	M	Knee	0.7	627	36.7
229	Low	NEG	3.41944	NA	None	None	None	NA	0	0	0	0	L KNEE	F	Knee	0.63	124	37.1
230	Low	POS	3.41667	None	None	Aerococcus_urinae, 36%; Pseudomonas putida, 31%; Staphylococcus epidermidis 5%; Streptococcus agalactiae, 3%	None	NA	0	0	0	0	R KNEE	F	Knee	4.21	1081	67
231	High	POS	7.35139	None	None	Escherichia_coli, 53%; Acinetobacter_calcoaceticus, 46%	None	NA	1	3	2	6	L HIP	M	Hip	10.49	4221	80.9
232	Low	NEG	5.34861	None	None	None	None	0	0	0	0	0	R KNEE FLUID + SW	F	Knee	1.11	32	24.9
233	Low	POS	4.37778	None	None	Staphylococcus_epidermidis 90%; Pantoea_agglomerans, 9%	None	NA	1	0	2	3	R KNEE	F	Knee	12.28	2304	89.8
234	High	POS	4.36736	Tetracycline	None	Morganella_morganii, 99%	None	NA	1	3	2	6	R KNEE	F	Knee	44.03	81774	83.8
235	Low	POS	7.36458	None	None	Streptococcus_mitis, 100%	None	NA	1	0	2	3	R KNEE	M	Knee	9.81	1176	93.4
236	High	POS	7.35764	None	None	Klebsiella_pneumoniae, 100%	None	NA	1	3	0	4	R KNEE	F	Knee	7.62	8386	79.2
237	Low	NEG	6.42847	None	None	None	None	0	0	0	0	0	L KNEE	M	Knee	3.66	501	27.1
238	High	POS	3.425	None	None	Escherichia_coli, 83%	None	NA	1	3	2	6	HIP SYNOVIAL FL	M	Hip	12.61	42343	94.7
239	Low	NEG	3.37639	None	None	None	None	0	0	0	0	0	R KNEE	F	Knee	0.04	12	8.3
240	Low	NEG	3.38264	None	None	None	None	0	0	3	0	3	L KNEE FL + SWAB	M	Knee	3.32	6306	21.2
241	Low	NEG	3.43472	None	None	None	None	0	0	0	0	0	R KNEE	F	Knee	0.14	40	17.5
242	Low	NEG	5.39861	None	Cutibacterium_acnes	None	None	NA	0	0	0	0	L HIP	F	Hip	4.04	228	11.9
243	Low	NEG	6.39097	None	None	None	None	0	0	0	0	0	L HIP FLUID SWAB	F	Hip	0.01	30	50
244	High	POS	4.40625	Methicillin	None	Staphylococcus_epidermidis 100%	None	NA	0	3	2	5	R KNEE	F	Knee	5.17	8253	97.6
245	Low	NEG	4.40347	None	None	None	None	0	0	0	0	0	R KNEE +SW	M	Knee	0.14	18	22.2
246	Low	NEG	4.38542	None	None	None	None	0	0	0	0	0	L KNEE	M	Knee	0.02	140	12.9
247	High	POS	4.39653	None	None	Streptococcus_oralis, 100%	None	NA	1	3	2	6	R KNEE	F	Knee	15.29	9702	93.3
248	Low	NEG	5.35278	None	None	None	None	0	0	0	0	0	L KNEE FLUID	F	Knee	0.02	48	22.9
249	High	POS	3.34097	None	Pseudomonas_aeruginosa	Pseudomonas_aeruginosa, 99%	Aureobasidium_pullulans, 99%	NA	0	3	2	5	R KNEE FLUID SWAB	M	Knee	1.69	22757	96
250	Low	NEG	4.47917	None	None	None	None	0	0	0	0	0	R KNEE	F	Knee	3.43	15	53.3
251	Low	NEG	4.47431	None	None	None	None	0	0	0	0	0	L KNEE	M	Knee	1.91	213	54.9
252	Low	NEG	4.47222	None	None	None	None	0	0	0	0	0	R KNEE	M	Knee	0.28	201	5.5
253	Low	NEG	3.51389	None	None	None	None	0	0	0	0	0	KNEE	F	Knee	0.23	46	10.9
254	High	POS	3.50694	None	Pseudomonas_aeruginosa	Pseudomonas_aeruginosa, 100%	None	NA	1	3	2	6	R KNEE	F	Knee	48.28	10626	86.9
255	Low	POS	3.50278	None	None	Staphylococcus_epidermidis 92%; Escherichia_coli, 4%; Bacteriodes_fragilis, 2%	None	NA	1	0	2	3	R HIP+SWAB	M	Hip	12.01	2296	92.4
256	High	POS	3.40556	None	None	Staphylococcus_epidermidis 77%; Escherichia_coli, 13%; Clostridium_bolteae, 3%; Lactobacillus_iners, 2%; Hungatella_hathewayi, 2%	None	NA	0	3	2	5	R KNEE SW X2 + FL	F	Knee	1.89	24577	95.6
257	Low	NEG	3.40694	None	None	None	None	0	0	0	0	0	L KNEE	M	Knee	0.11	840	30.9
258	Low	POS	3.40139	None	None	Staphylococcus_epidermidis 37%; Staphylococcus_lugdunensis, 35%; Chrysobacterium_sp, 10%; Cutibacterium_acnes, 7%	None	NA	1	0	2	3	R KNEE	M	Knee	22.25	2002	95.2
259	Low	NEG	2.40972	None	None	None	None	0	0	0	0	0	R KNEE	M	Knee	0.05	217	29
260	Low	NEG	4.41319	None	None	None	None	0	1	0	0	1	R KNEE	F	Knee	7.66	318	27.7
261	High	POS	4.40139	NA	None	Enterobacter_cloacae, 100%	Candida_albicans, 99%	NA	1	3	2	6	L KNEE	M	Knee	12.35	6874	88.2
262	High	POS	4.40278	NA	None	Streptococcus_mitis, 90%; Finegoldia_magna, 9%	None	NA	1	3	2	6	L KNEE	F	Knee	25.21	99211	91.9
263	High	POS	3.42222	None	None	Campylobacter_jejuni, 98%	None	NA	1	3	2	6	RT HIP	M	Hip	41.91	38913	85.6
264	Low	POS	6.41458	None	None	Staphylococcus_epidermidis 40%; Cutibacterium_acnes, 32%; Acinetobacter_johnsonii, 27%	None	NA	0	0	0	0	L KNEE	F	Knee	3.5	1204	36.7
265	Low	POS	3.38264	None	None	Staphylococcus_epidermidis 100%	None	NA	1	0	2	3	R HIP Fl	M	Hip	16.72	2709	96.9
266	High	POS	2.36181	None	None	Streptococcus_mutans, 63%; Massilia_timonae, 18%	None	NA	0	3	2	5	R KNEE	M	Knee	1.92	20573	92.6
267	High	POS	2.35139	None	None	Staphylococcus_simulans, 27%; Staphylococcus_epidermidis 24%; Enterococcus_faecalis, 18%; Staphylococcus_cohnii, 14%; Dermabacter_hominis, 4%; Staphylococcus_haemolyticus, 3%; Prevotella_timonensis, 2%; Staphylococcus_aureus, 2%	None	NA	1	3	0	4	RIGHT KNEE	M	Knee	20.07	16646	79.8
268	High	POS	5.40833	None	None	Staphylococcus_aureus, 97%	None	NA	1	3	2	6	R KNEE	M	Knee	9.88	34286	95.2
269	Low	NEG	2.40069	None	None	None	None	0	0	0	0	0	R KNEE SYNOVIAL FL	M	Knee	0.07	21	0
270	High	POS	2.3875	None	Cutibacterium_acnes; Staphylococcus_aureus	Staphylococcus_aureus, 100%	None	NA	1	3	2	6	L KNEE	M	Knee	39.9	46438	82.1
271	Low	NEG	5.38403	None	None	None	None	0	0	0	0	0	L KNEE	M	Knee	1.52	54	11.1
272	Low	NEG	4.575	None	None	None	None	0	0	3	0	3	R HIP	M	Hip	0.07	5265	5.6
273	Low	NEG	3.40139	None	None	None	None	0	0	0	0	0	L KNEE	M	Knee	1.43	63	11.1
274	Low	POS	3.4	None	None	Megamonas_funiformis, 59%; Lactobacillus_sp, 39%	None	NA	0	0	0	0	L KNEE	F	Knee	0.39	553	46.8
275	Low	POS	5.46389	None	None	Staphylococcus_epidermidis 80%	None	NA	1	0	2	3	R HIP	M	Hip	40.36	1586	83.9
276	High	POS	1.46181	Aminoglycoside	Staphylococcus_aureus_x000D__x000D_	Staphylococcus_aureus, 98%	None	NA	1	3	2	6	R KNEE +FL	F	Knee	68.57	20510	95.8
277	Low	NEG	4.325	None	None	None	None	0	0	0	0	0	R KNEE	M	Knee	0.09	49	14.3
278	Low	POS	4.33056	None	Cutibacterium_acnes	Cutibacterium_acnes, 93%; Staphylococcus_epidermidis 2%	None	NA	0	0	0	0	L KNEE	F	Knee	0.18	75	12
279	High	NEG	4.33194	None	None	None	None	0	0	3	2	5	R KNEE	M	Knee	0.19	12376	82.6
280	Low	NEG	6.45625	None	None	None	None	0	0	0	0	0	L KNEE SW + 7 ML	M	Knee	0.02	658	28.7
281	Low	NEG	6.45486	None	None	None	None	0	0	0	0	0	L KNEE	F	Knee	0.05	432	38.4
282	High	POS	6.44792	None	None	Streptococcus_mitis, 83%; Exiguobacterium_sp, 16%	None	NA	1	3	2	6	R KNEE	F	Knee	22.45	4599	85.9
283	Low	POS	6.44583	None	None	None	Candida_metapsilosis, 100%	NA	1	0	2	3	L KNEE	F	Knee	8.52	2240	87.1
284	Low	NEG	6.44167	None	None	None	None	0	0	0	0	0	R KNEE	M	Knee	1.11	140	0
285	Low	NEG	6.43958	None	None	None	None	0	0	0	2	2	R KNEE 3x T, 1 mL FL	F	Knee	1.17	1652	83.9
286	Low	NEG	2.44306	None	None	None	None	0	0	0	0	0	R KNEE	M	Knee	0.22	609	44.9
287	Low	NEG	5.49653	None	None	None	None	0	0	0	0	0	JF R KNEE	F	Knee	0.09	1540	9.1
288	Low	NEG	5.49167	None	None	None	None	0	0	0	0	0	R HIP	F	Hip	0.61	709	6.5
289	Low	NEG	2.48542	None	None	None	None	0	1	0	0	1	R KNEE+ FL	F	Knee	8.04	84	16.7
290	Low	NEG	4.54861	None	None	None	None	0	1	0	0	1	R KNEE	M	Knee	8.8	58	12.1
291	High	POS	1.35556	None	None	Serratia_marcescens, 91%	None	NA	1	3	2	6	L KNEE	M	Knee	54.94	51135	92
292	High	POS	3.35347	None	None	Morganella_morganii, 90%	None	NA	1	3	2	6	R KNEE	F	Knee	13.26	8743	95.3
293	High	NEG	3.34861	None	None	None	None	0	0	3	2	5	L KNEE	F	Knee	2.62	5957	90.6
294	Low	NEG	3.34444	None	None	None	None	0	0	0	0	0	R KNEE	M	Knee	0.72	147	55.1
295	Low	NEG	2.34236	None	None	None	None	0	0	0	0	0	R KNEE FLUID +SW	M	Knee	0.2	35	20
296	Low	NEG	3.34097	None	None	None	None	0	0	0	0	0	L KNEE SYNOVIAL	F	Knee	0.11	42	33.3
297	Low	NEG	3.33611	None	None	None	None	0	0	0	0	0	L KNEE	M	Knee	0.68	28	25
298	High	POS	3.35208	None	None	Staphylococcus_epidermidis 76%	None	NA	1	3	2	6	L KNEE	F	Knee	6.9	10101	94.2
299	High	POS	3.35069	NA	NA	None	Candida_albicans, 100%	1	1	3	2	6	L KNEE	M	Knee	9.07	7329	88.5
300	Low	NEG	2.35	None	None	None	None	0	0	0	0	0	L KNEE	F	Knee	0.09	315	44.4
301	Low	NEG	3.34583	None	None	None	None	0	0	0	0	0	L KNEE	M	Knee	1.64	1624	51.7
302	Low	POS	5.45486	Methicillin	None	Staphylococcus_epidermidis 78%	None	NA	1	0	2	3	L HIP SYNOVIAL FL	F	Hip	9.78	2891	83.3
303	Low	NEG	5.45139	None	None	None	None	0	0	0	0	0	L KNEE +FL	F	Knee	0.07	30	3.3
304	High	POS	5.45	None	None	Lactobacillus_gasseri, 89%	None	NA	1	3	2	6	R KNEE	M	Knee	19.98	4046	83.7
305	Low	NEG	5.44861	None	None	None	None	0	0	0	0	0	R KNEE	F	Knee	0.87	175	12
306	Low	NEG	4.44306	None	None	None	None	0	0	3	0	3	L KNEE +FLUID	M	Knee	0.06	345919	0.5
307	Low	NEG	4.45486	None	None	None	None	0	0	0	0	0	R KNEE	F	Knee	0.04	39	12.8
308	Low	NEG	4.45347	None	None	None	None	0	0	0	0	0	L HIP + FL	M	Hip	2.91	133	10.5
309	High	POS	3.43056	Methicillin	Staphylococcus_aureus	Staphylococcus_aureus, 94%	None	NA	1	3	2	6	L KNEE	F	Knee	14.35	85190	96
310	Low	NEG	6.42639	None	None	None	None	0	0	0	0	0	R KNEE	F	Knee	1.95	130	17.7
311	High	POS	3.42431	None	None	Staphylococcus_epidermidis 55%; Actinomyces_odontolyticus, 10%; Abiotrophica_defectiva, 7%	None	NA	1	3	2	6	L KNEE	M	Knee	37.95	21623	95.9
312	Low	NEG	6.41944	None	None	None	None	0	0	0	0	0	R KNEE TKA	M	Knee	1.66	119	29.4
313	Low	NEG	6.41319	None	None	None	None	0	0	0	0	0	L KNEE	M	Knee	0.2	146	8.2
314	Low	NEG	6.41111	None	None	None	None	0	0	0	0	0	L KNEE	M	Knee	2.35	163	66.3
315	Low	NEG	6.40764	None	None	None	None	0	0	0	0	0	R KNEE	M	Knee	0.19	35	20
316	Low	NEG	6.43194	None	None	None	None	0	0	0	0	0	R KNEE FL + SW	F	Knee	0.05	266	44.7
317	Low	NEG	6.42986	None	None	None	None	0	0	0	0	0	R KNEE FL	M	Knee	0.09	91	30.8
318	Low	NEG	6.42708	None	None	None	None	0	0	0	0	0	R KNEE FL	M	Knee	0.34	56	62.5
319	Low	NEG	6.42639	None	None	None	None	0	0	0	0	0	L KNEE	M	Knee	1.38	35	20
320	Low	NEG	6.42569	None	None	None	None	0	0	0	0	0	L KNEE	F	Knee	0.92	15	33.3
321	Low	NEG	6.42361	None	None	None	None	0	0	0	0	0	R KNEE	F	Knee	0.1	70	20
322	High	POS	3.42153	Aminoglycoside	Enterococcus_faecalis	Enterococcus_faecalis, 91%; Staphylococcus_epidermidis 5%	None	NA	1	3	2	6	L HIP	M	Hip	19.33	12950	90.6
323	Low	NEG	6.41944	None	None	None	None	0	0	0	0	0	R KNEE	M	Knee	0.11	847	76.1
324	Low	NEG	6.41736	None	None	None	None	0	0	0	0	0	L HIP	F	Hip	0.01	15	73.4
325	Low	NEG	5.39653	None	None	None	None	0	0	0	0	0	L KNEE + SW	F	Knee	0.41	524	22
326	High	POS	2.38889	Beta-lactam, Tetracycline, Bactrim	None	Escherichia_coli, 99%	None	NA	1	3	2	6	L KNEE	M	Knee	54.86	141589	83
327	Low	NEG	5.37222	None	None	None	None	0	0	0	0	0	O F R KNEE	F	Knee	0.17	62	9.6
328	Low	NEG	5.36736	None	None	None	None	0	0	0	0	0	R KNEE + SW	M	Knee	1.12	17	11.8
329	Low	NEG	5.36528	None	None	None	None	0	0	0	0	0	L KNEE	M	Knee	0.49	24	12.5
330	Low	NEG	5.36319	None	None	None	None	0	0	0	0	0	R KNEE	M	Knee	0.04	20	10
331	Low	NEG	5.41667	None	None	None	None	0	1	0	0	1	R KNEE	F	Knee	30.09	273	71.8
332	High	POS	5.40625	None	None	Staphylococcus_epidermidis 97%	None	NA	0	3	2	5	L KNEE	F	Knee	6.51	4676	83
333	Low	NEG	5.40347	None	None	None	None	0	0	0	0	0	R KNEE	M	Knee	0.03	119	5.9
334	Low	NEG	5.39931	None	None	None	None	0	0	0	0	0	R KNEE	M	Knee	1.29	61	16.4
335	High	POS	5.39792	None	None	Staphylococcus_capitis, 96%	None	NA	1	3	2	6	R KNEE	F	Knee	74.03	9604	86
336	Low	NEG	5.39583	None	None	None	None	0	0	0	0	0	JF R KNEE FLUID	M	Knee	0.18	126	38.9
337	Low	NEG	8.43056	None	None	None	None	0	0	0	0	0	R KNEE	F	Knee	0.01	89	16.9
338	Low	NEG	8.42708	None	None	None	None	0	0	0	0	0	R KNEE	F	Knee	0.47	49	40.8
339	Low	NEG	8.42361	None	None	None	None	0	1	0	2	3	R KNEE	F	Knee	8.01	1414	80.7
340	Low	NEG	8.42153	None	None	None	None	0	0	0	0	0	R KNEE	F	Knee	0.26	42	16.6
341	Low	POS	7.42083	None	None	Staphylococcus_lugdunensis, 100%	None	NA	1	0	0	1	L KNEE	M	Knee	7.39	1624	67.2
342	High	POS	1.40417	None	Staphylococcus_aureus	Staphylococcus_aureus, 100%	None	NA	1	3	2	6	L KNEE	F	Knee	26.34	185479	90.3
343	Low	POS	6.40069	None	None	Staphylococcus_aureus, 100%	None	NA	0	0	0	0	L KNEE	F	Knee	0.07	2086	38
344	Low	NEG	7.39583	None	None	None	None	0	0	0	0	0	R KNEE	M	Knee	2.98	252	69.4
345	Low	POS	5.51944	None	None	Serratia_marcescens, 73%; Streptococcus_agalactiae, 5%; Staphylococcus_epidermidis 2%	None	NA	0	3	0	3	L KNEE SYNOVIAL	M	Knee	1.26	9632	6.7
346	High	NEG	6.50069	None	None	None	None	0	1	3	0	4	L KNEE	F	Knee	7.34	3605	68.8
347	Low	POS	5.40486	None	None	Acinetobacter_johnsonii, 100%	None	NA	0	0	0	0	L HIP FLUID SWAB	F	Hip	0.04	1561	49.3
348	Low	NEG	5.40347	None	None	None	None	0	0	0	0	0	L KNEE FLUID SWAB	M	Knee	0.15	35	20
349	Low	POS	4.40069	None	None	Proteus_mirabilis, 50%; Staphylococcus_aureus, 44%	None	NA	0	0	2	2	L KNEE	F	Knee	0.5	2443	83.1
350	High	POS	7.39722	None	None	Staphylococcus_aureus, 100%	None	NA	0	3	2	5	R KNEE	M	Knee	0.92	17948	96.6
351	Low	NEG	6.39167	None	None	None	None	0	0	0	0	0	R KNEE	F	Knee	2.02	1561	25.1
352	Low	NEG	6.39028	None	None	None	None	0	0	0	0	0	L KNEE	F	Knee	2.58	2240	30.6
353	Low	NEG	6.37431	None	None	None	None	0	0	0	0	0	R KNEE + FL	F	Knee	0.06	70	10
354	Low	NEG	6.37222	None	None	None	None	0	0	0	0	0	L KNEE + FL	M	Knee	0.43	19	10.6
355	High	POS	3.37153	None	None	Staphylococcus_aureus, 100%	Aureobasidium_pullulans, 98%	NA	1	3	2	6	R KNEE + FL	M	Knee	20.54	10122	96
356	Low	NEG	6.37014	None	None	None	None	0	0	0	0	0	L KNEE	M	Knee	0.28	21	33.4
357	High	POS	3.36181	None	None	Staphylococcus_epidermidis 100%	None	NA	1	3	2	6	L KNEE	M	Knee	46.51	19194	92.5
358	High	POS	1.39236	Methicillin, Aminoglycoside	Staphylococcus_aureus	Enterobacter_cloacae, 55%; Staphylococcus_aureus, 43%	None	NA	1	3	2	6	L KNEE	F	Knee	18.52	26222	92.7
359	Low	NEG	4.39028	None	None	None	None	0	0	0	0	0	R KNEE	M	Knee	0.77	56	25
360	Low	NEG	6.37986	None	None	None	None	0	1	0	0	1	R KNEE FLUID	F	Knee	67.7	399	57.9
361	High	POS	3.37569	Methicillin	None	Staphylococcus_epidermidis 92%	None	NA	1	3	2	6	RT KNEE FLUID + SWAB	M	Knee	30.83	30646	94.6
362	High	POS	3.37014	Methicillin	None	Staphylococcus_epidermidis 61%; Enterococcus_faecalis, 33%	None	NA	0	3	2	5	RT KNEE FLUID	M	Knee	3.75	11020	95.1
363	Low	NEG	6.36806	None	None	None	None	0	0	0	0	0	R KNEE FLUID	M	Knee	2.92	126	44.4
364	Low	NEG	6.36667	None	Cutibacterium_acnes	None	None	NA	0	0	0	0	LT KNEE	M	Knee	0.26	31	6.5
365	Low	NEG	2.42569	None	None	None	None	0	0	0	0	0	R KNEE	M	Knee	0.06	49	14.2
366	High	POS	2.42431	None	None	Staphylococcus_capitis, 100%	None	NA	1	3	2	6	R KNEE	M	Knee	10.1	18865	94.8
367	Low	POS	5.42083	None	None	None	Candida_albicans, 99%	NA	0	0	2	2	L KNEE	M	Knee	5.85	2177	81
368	Low	NEG	2.44583	None	None	None	None	0	0	0	0	0	R KNEE	M	Knee	0.14	315	64.5
369	High	POS	2.44444	None	None	Staphylococcus_capitis, 98%	None	NA	0	3	2	5	L HIP	M	Hip	0.12	5649	93.3
370	High	POS	2.44306	Methicillin, Aminoglycoside	None	Staphylococcus_epidermidis 86%; Staphylococcus_lugdunensis, 11%	None	NA	1	3	2	6	R KNEE	M	Knee	34.83	4263	93
371	Low	NEG	2.44236	None	None	None	None	0	0	0	0	0	R HIP	F	Hip	0.82	210	23.3
372	Low	NEG	2.44097	None	None	None	None	0	0	0	0	0	R KNEE	M	Knee	0.09	67	4.5
373	Low	NEG	2.43958	None	None	None	None	0	0	0	0	0	L KNEE	F	Knee	0.46	42	50
374	Low	NEG	2.40833	None	None	None	None	0	0	0	0	0	R KNEE	M	Knee	1.43	26	19.3
375	Low	NEG	2.40208	None	None	None	None	0	0	0	2	2	R KNEE	M	Knee	0.02	147	81
376	Low	NEG	2.39792	None	None	None	None	0	0	0	0	0	R KNEE	F	Knee	0.04	38	7.9
377	High	POS	1.39722	Aminoglycoside	None	Staphylococcus_capitis, 100%	None	NA	1	3	2	6	L KNEE	F	Knee	39.16	19481	95.1
378	Low	NEG	5.42569	None	None	None	None	0	0	0	0	0	R KNEE	F	Knee	0.17	112	13.4
379	Low	NEG	4.40694	None	None	None	None	0	0	0	0	0	R KNEE SYNOVIAL FL	F	Knee	1.09	273	15.7
380	Low	NEG	4.41319	None	None	None	None	0	0	0	0	0	R KNEE	M	Knee	0.39	784	55.3
381	Low	NEG	4.39722	None	None	None	None	0	0	3	0	3	L KNEE SYNOVIAL	M	Knee	0.98	8883	8.2
382	Low	NEG	4.39583	None	None	None	None	0	0	0	0	0	L KNEE	M	Knee	1.97	84	41.7
383	Low	POS	4.38819	None	None	Morganella_morganii, 82%; Kocuria_rhizophila, 17%	None	NA	0	0	2	2	R KNEE	F	Knee	6.45	1663	85.2
384	High	POS	4.38611	Methicillin	Staphylococcus_aureus	Staphylococcus_aureus, 100%	None	NA	1	3	2	6	R KNEE	F	Knee	9.14	34363	92.5
385	Low	NEG	4.38403	None	None	None	None	0	0	0	0	0	R KNEE	F	Knee	0.16	58	34.5
386	Low	NEG	4.39931	None	None	None	None	0	1	0	0	1	L HIP	F	Hip	8.18	357	47
387	Low	POS	4.39722	None	None	Staphylococcus_epidermidis 100%	None	NA	0	0	0	0	L HIP	F	Hip	0.27	633	31.9
388	Low	NEG	4.39653	None	None	None	None	0	0	0	0	0	L KNEE	M	Knee	0.73	23	8.7
389	Low	NEG	3.42639	None	None	None	None	0	0	0	0	0	L KNEE	M	Knee	0.01	45	11.2
390	Low	NEG	6.42361	None	None	None	None	0	1	0	0	1	L KNEE	F	Knee	7.27	125	53.6
391	Low	NEG	3.42222	None	None	None	None	0	0	0	0	0	R KNEE	M	Knee	2.06	5	40
392	Low	NEG	2.41042	None	None	None	None	0	1	0	0	1	L HIP	M	Hip	22.07	126	50
393	Low	NEG	2.40625	None	None	None	None	0	0	0	0	0	R KNEE	M	Knee	0.35	84	3.6
394	Low	NEG	2.40417	None	None	None	None	0	0	0	0	0	L KNEE	F	Knee	0.3	34	2.9
395	High	POS	2.40069	None	None	Staphylococcus_epidermidis 100%	None	NA	0	3	2	5	L KNEE	F	Knee	6.5	14028	93.9
396	Low	NEG	2.39861	None	None	None	None	0	0	0	0	0	L KNEE	M	Knee	6.73	266	73.7
397	Low	POS	2.39444	None	None	Proteus_mirabilis, 100%	None	NA	0	0	0	0	L KNEE	F	Knee	0.35	1449	56
398	High	POS	2.42778	Methicillin, Aminoglycoside	None	Staphylococcus_epidermidis 99%	None	NA	0	3	2	5	R KNEE	F	Knee	1.96	8988	96.2
399	High	POS	5.42292	None	None	Staphylococcus_epidermidis 84%; Bacillus_megaterium, 9%; Acinetobacter_johnsonii, 5%	None	NA	1	3	2	6	R KNEE	M	Knee	8.55	5817	88.7
400	Low	NEG	2.42153	None	None	None	None	0	0	0	2	2	R KNEE	F	Knee	6.25	735	81.9
401	Low	NEG	2.42014	None	None	None	None	0	0	0	0	0	R KNEE	M	Knee	1.51	182	69.2
402	Low	NEG	2.41111	None	None	None	None	0	0	0	2	2	L KNEE	F	Knee	3.93	2331	85.9
403	Low	NEG	2.41458	None	None	None	None	0	0	0	0	0	L KNEE FLUID	F	Knee	3.47	70	10
404	Low	NEG	4.56875	None	None	None	None	0	0	0	0	0	R KNEE	M	Knee	0.01	25	52
405	Low	NEG	3.4375	None	None	None	None	0	1	0	0	1	R KNEE	M	Knee	29.86	85	64.7
406	High	POS	3.43542	Methicillin	None	Staphylococcus_epidermidis 89%	None	NA	1	3	2	6	R KNEE	M	Knee	31.23	12859	89.8
407	Low	NEG	3.43264	None	None	None	None	0	0	0	0	0	L HIP	M	Hip	0.46	273	64.1
408	High	POS	5.42083	None	None	Staphylococcus_epidermidis 93%	None	NA	1	3	2	6	L KNEE	F	Knee	42.34	18466	91.3
409	Low	NEG	5.41181	None	None	None	None	0	0	0	0	0	L KNEE	M	Knee	2.55	50	40
410	Low	NEG	5.4	None	None	None	None	0	0	0	0	0	R KNEE	M	Knee	2.99	88	54.6
411	Low	NEG	5.39444	None	None	None	None	0	0	0	0	0	L KNEE+ FL	M	Knee	0.59	356	26.2
412	High	POS	5.38958	Methicillin	None	Staphylococcus_epidermidis 100%	None	NA	1	3	2	6	L KNEE JOINT + FL	M	Knee	7.59	32186	94.2
413	High	POS	5.38472	None	None	Streptococcus_equinus, 97%	None	NA	1	3	2	6	R KNEE	M	Knee	20.45	67767	80.4
414	Low	NEG	5.37778	None	None	None	None	0	0	0	0	0	L KNEE	F	Knee	0.01	262	40.5
415	Low	POS	4.35972	None	None	None	Candida_parapsilosis, 100%	NA	0	3	0	3	L KNEE	M	Knee	0.02	3171	77.5
416	Low	POS	4.35417	None	None	None	Candida_albicans, 99%	NA	0	3	0	3	L HIP	F	Hip	0.01	3745	74
417	Low	NEG	4.35069	None	None	None	None	0	0	0	0	0	L KNEE SYNOVIAL	F	Knee	0.65	320	15.6
418	Low	NEG	6.37014	None	None	None	None	0	0	0	0	0	R KNEE	F	Knee	0.42	74	21.6
419	High	POS	3.36736	None	Staphylococcus_aureus	Staphylococcus_aureus, 98%	None	NA	1	3	2	6	L KNEE	M	Knee	25.72	40369	85.5
420	Low	NEG	3.36667	None	None	None	None	0	0	0	0	0	R KNEE	M	Knee	0.05	9	0
421	Low	NEG	6.40764	None	None	None	None	0	0	0	0	0	R KNEE FL	M	Knee	1.38	273	59
422	High	POS	3.40694	None	None	Prevotella_bivia, 99%	None	NA	1	3	2	6	L KNEE FL + SW	M	Knee	9.58	16037	92.8
423	Low	NEG	3.40417	None	None	None	None	0	0	0	0	0	L KNEE SYNOVIAL FL	F	Knee	3.17	57	12.3
424	Low	NEG	4.43194	None	None	None	None	0	0	0	0	0	R KNEE FL	M	Knee	0.11	52	11.5
425	Low	NEG	4.43056	None	None	None	None	0	0	0	0	0	L HIP	F	Hip	0.98	147	47.6
426	Low	NEG	4.40069	None	None	None	None	0	0	0	0	0	R KNEE	F	Knee	0.21	42	16.6
427	Low	NEG	5.39861	None	None	None	None	0	0	0	0	0	R KNEE	M	Knee	0.07	161	43.5
428	Low	NEG	4.39653	None	None	None	None	0	0	0	0	0	R KNEE	F	Knee	6.72	798	49.1
429	Low	NEG	4.39514	None	None	None	None	0	0	0	0	0	R KNEE	F	Knee	0.07	245	54.3
430	Low	NEG	4.39444	None	None	None	None	0	0	0	0	0	L KNEE	M	Knee	6.25	336	31.2
431	Low	NEG	4.39375	None	None	None	None	0	0	0	0	0	R KNEE	M	Knee	6.31	343	14.3
432	Low	NEG	4.4125	None	None	None	None	0	0	0	0	0	L KNEE	M	Knee	0.05	53	18.8
433	Low	NEG	4.40625	None	None	None	None	0	0	3	0	3	L KNEE	M	Knee	6.8	4291	71.9
434	Low	NEG	4.39375	None	None	None	None	0	0	0	0	0	R KNEE	F	Knee	0.13	440	25
435	Low	POS	4.38889	None	None	Escherichia_coli, 34%; Klebsiella_pneumoniae, 20%; Proteus_mirabilis, 16%; Enterococcus_faecalis, 10%; Staphylococcus_hominis, 10%	None	NA	0	0	0	0	L KNEE	M	Knee	0.59	27	14.8
436	Low	NEG	2.37014	None	None	None	None	0	0	0	0	0	R KNEE	M	Knee	1.15	2807	76.8
437	Low	NEG	3.36806	None	None	None	None	0	0	0	0	0	L KNEE	M	Knee	0.85	3	0
438	High	POS	1.36667	Methicillin, Tetracycline	None	Prevotella_melaninogenica, 37%; Staphylococcus_epidermidis 23%; Haemophilus_parainfluenzae, 17%; Anaerococcus_hydrogenalis, 12%; Finegoldia_magna, 2%; Porphyromonas_bennonis, 2%; Streptococcus_mitis, 2%	None	NA	0	3	2	5	L KNEE	M	Knee	5.4	23660	93.9
439	Low	NEG	6.35833	None	None	None	None	0	0	0	0	0	R HIP	M	Hip	0.15	1778	16.1
440	Low	NEG	6.35625	None	None	None	None	0	0	0	0	0	L HIP	F	Hip	0.11	42	33.3
441	High	POS	1.35139	None	None	Staphylococcus_capitis, 100%	None	NA	1	3	0	4	R HIP	M	Hip	49	23779	67.4
442	Low	NEG	6.34931	None	None	None	None	0	1	0	0	1	R HIP JOINT	M	Hip	10.87	1120	66.8
443	High	NEG	6.34792	None	None	None	None	0	1	3	2	6	L KNEE	F	Knee	18.92	15554	98.3
444	Low	NEG	6.34583	None	None	None	None	0	0	0	0	0	R KNEE	M	Knee	0.14	51	11.7
445	Low	NEG	6.34444	None	None	None	None	0	1	0	0	1	L KNEE	M	Knee	8.51	574	74.4
446	High	POS	5.44514	Bactrim	None	Escherichia_coli, 79%	None	NA	1	3	2	6	L KNEE	M	Knee	109.37	9121	95.8
447	Low	NEG	5.44583	None	None	None	None	0	0	0	0	0	L KNEE	M	Knee	0.12	21	33.3
448	Low	NEG	5.4375	None	None	None	None	0	0	0	0	0	R KNEE	F	Knee	0.05	56	37.5
449	Low	NEG	5.42569	None	None	None	None	0	0	0	0	0	L KNEE	F	Knee	1.04	70	40
450	Low	POS	5.42222	None	None	Klebsiella_aerogenes, 100%	None	NA	0	3	0	3	L KNEE	M	Knee	1.63	19019	5.2
451	Low	NEG	5.41875	None	None	None	None	0	0	0	0	0	R KNEE	F	Knee	1.54	63	33.4
452	Low	NEG	5.4	None	None	None	None	0	0	0	0	0	R KNEE	M	Knee	0.05	413	1.7
453	Low	NEG	4.42847	None	None	None	None	0	0	0	0	0	L KNEE	F	Knee	3.17	1988	47.9
454	High	POS	3.42639	None	None	Staphylococcus_lugdunensis, 96%; Cutibacterium_acnes, 3%	None	NA	1	3	2	6	L KNEE	M	Knee	23.91	16044	96.1
455	Low	NEG	4.41875	None	None	None	None	0	0	0	0	0	L KNEE	F	Knee	0.33	1043	57.1
456	Low	NEG	4.43264	None	None	None	None	0	0	3	0	3	R KNEE	M	Knee	4.94	3935	23.8
457	Low	NEG	5.50208	None	None	None	None	0	0	0	0	0	R KNEE	F	Knee	0.01	14	0
458	Low	NEG	4.51528	None	None	None	None	0	0	0	0	0	L KNEE	F	Knee	0.23	720	19.4
459	Low	POS	4.51458	None	None	Staphylococcus_epidermidis 87%	None	NA	0	0	2	2	R KNEE	M	Knee	5.94	2373	80.2
460	Low	NEG	4.5125	None	None	None	None	0	0	0	0	0	R KNEE	M	Knee	0.02	156	76.9
461	Low	POS	4.51181	None	None	Kocuria_marina, 77%	None	NA	0	0	0	0	R KNEE	M	Knee	0.16	35	40
462	Low	NEG	4.50972	None	None	None	None	0	0	0	0	0	L KNEE	F	Knee	1.97	53	15
463	High	POS	4.50764	None	None	None	Candida_albicans, 94%	1	1	3	2	6	L KNEE	M	Knee	11.98	6125	92.4
464	Low	NEG	2.41736	None	None	None	None	0	0	0	0	0	R KNEE	M	Knee	1.94	1232	44.3
465	High	NEG	2.41181	None	None	None	None	0	1	3	2	6	R KNEE FLUID + SW	F	Knee	8.33	7588	86.8
466	Low	NEG	2.40694	None	None	None	None	0	0	0	0	0	R KNEE	M	Knee	0.15	287	61
467	High	POS	6.40486	None	None	Staphylococcus_lugdunensis, 100%	None	NA	0	3	2	5	R KNEE	M	Knee	0.38	4585	92.4
468	Low	NEG	5.43333	None	None	None	None	0	0	0	0	0	R KNEE	F	Knee	6.32	1568	74.5
469	Low	NEG	5.4125	None	None	None	None	0	0	0	0	0	R KNEE	F	Knee	0.03	91	23.1
470	Low	NEG	5.40694	None	None	None	None	0	0	0	0	0	L KNEE	F	Knee	0.02	70	0
471	Low	NEG	5.44028	None	None	None	None	0	1	0	0	1	L KNEE	F	Knee	16	1302	34.9
472	Low	NEG	5.4375	None	None	None	None	0	0	0	0	0	L KNEE	F	Knee	1.73	1624	22.8
473	High	POS	4.43403	None	None	Morganella_morganii, 100%	None	NA	1	3	2	6	R KNEE	F	Knee	7.7	8569	96.7
474	Low	NEG	5.42986	None	None	None	None	0	0	0	0	0	R KNEE TISSUE	M	Knee	4.08	350	72
475	High	POS	4.42708	None	None	Staphylococcus_aureus, 99%	None	NA	1	3	2	6	L KNEE	M	Knee	66.2	28357	90.2
476	Low	NEG	5.42153	None	None	None	None	0	0	0	0	0	L KNEE	F	Knee	0.56	861	15.5
477	Low	NEG	5.41944	None	None	None	None	0	0	0	0	0	R KNEE	F	Knee	0.02	14	50
478	Low	NEG	5.41875	None	None	None	None	0	0	0	0	0	R KNEE	F	Knee	0.05	49	0
479	Low	NEG	5.41528	None	None	None	None	0	1	0	2	3	L HIP	F	Hip	8.74	2051	86.7
480	Low	NEG	5.41458	None	None	None	None	0	0	0	0	0	L HIP	F	Hip	2.79	861	41.5
481	High	POS	1.44444	Methicillin	None	Staphylococcus_epidermidis 89%; Staphylococcus_lugdunensis, 10%	Naganishia_diffluens, 60%; Piskurozyma_capsuligena, 33%; Cladosporium_halotolerans, 4%	NA	1	3	2	6	R KNEE	M	Knee	36.85	7294	94.8
482	Low	NEG	5.44306	None	None	None	None	0	0	0	0	0	L KNEE	F	Knee	0.37	63	66.7
483	Low	NEG	6.44028	None	None	None	None	0	0	0	0	0	L KNEE	F	Knee	0.06	175	8
484	Low	NEG	6.42917	None	None	None	None	0	0	0	0	0	R KNEE	F	Knee	0.84	69	16
485	Low	NEG	6.42708	None	None	None	None	0	0	0	0	0	L KNEE	M	Knee	0.39	42	0
486	Low	NEG	6.42014	None	None	None	None	0	0	0	0	0	R KNEE FLUID	F	Knee	4.72	2072	41.2
487	Low	NEG	6.41597	None	None	None	None	0	0	0	0	0	L KNEE	M	Knee	0.02	84	8.3
488	High	POS	3.40903	None	None	Serratia_marcescens, 87%	None	NA	1	3	2	6	L KNEE	M	Knee	38.41	18669	90.3
489	Low	NEG	6.42917	None	None	None	None	0	0	0	0	0	L HIP	F	Hip	0.02	1	0
490	Low	NEG	6.42778	None	None	None	None	0	0	0	0	0	R KNEE	F	Knee	3.04	1087	41.8
491	Low	NEG	5.42292	None	None	None	None	0	0	0	0	0	R KNEE	M	Knee	0.93	133	5.3
492	Low	NEG	2.46181	None	None	None	None	0	0	0	0	0	R KNEE	M	Knee	1.47	2506	61.7
493	Low	NEG	5.46111	None	None	None	None	0	0	0	0	0	L KNEE	F	Knee	0.05	511	43.9
494	Low	NEG	5.45972	None	None	None	None	0	0	0	0	0	L KNEE	M	Knee	3.2	609	60.9
495	Low	NEG	5.45903	None	None	None	None	0	0	0	0	0	L KNEE	F	Knee	1.11	19	21
496	Low	NEG	5.45764	None	None	None	None	0	0	0	0	0	R KNEE	M	Knee	0.01	350	8
497	Low	NEG	5.45556	None	None	None	None	0	0	0	0	0	L KNEE	F	Knee	1.42	119	47
498	Low	NEG	3.45417	None	None	None	None	0	1	0	0	1	R KNEE	M	Knee	32.51	189	33.3
499	High	POS	2.45208	None	None	Staphylococcus_epidermidis 91%	None	NA	1	3	2	6	L KNEE SYNOVIAL FL	M	Knee	16.83	7077	90.8
500	Low	NEG	3.43333	None	None	None	None	0	0	0	0	0	L KNEE	M	Knee	0.05	28	25
501	High	POS	2.44097	None	None	Staphylococcus_epidermidis 100%	None	NA	0	3	2	5	R KNEE	M	Knee	6.1	21826	96.6
502	Low	NEG	4.55625	None	None	None	None	0	1	0	0	1	L KNEE	F	Knee	7.39	71	21.1
503	Low	NEG	3.37778	None	None	None	None	0	0	0	0	0	R KNEE	M	Knee	1.53	27	7.4
504	Low	NEG	3.37569	None	None	None	None	0	0	0	0	0	L KNEE	M	Knee	0.09	19	36.8
505	Low	NEG	3.37431	None	None	None	None	0	0	0	0	0	R KNEE JOINT	M	Knee	0.1	77	13
506	Low	NEG	6.42153	None	None	None	None	0	0	0	0	0	R KNEE	F	Knee	0.83	32	12.5
507	Low	NEG	6.41944	None	None	None	None	0	0	0	0	0	R KNEE	F	Knee	0.21	9	11.2
508	Low	NEG	6.41806	None	None	None	None	0	0	0	0	0	R KNEE	F	Knee	1.58	212	5.2
509	High	POS	4.41319	Bactrim	Pseudomonas_aeruginosa	Escherichia_coli, 65%; Pseudomonas_aeruginosa, 22%; Enterobacter_ludwigii, 10%	None	NA	1	3	2	6	R KNEE	M	Knee	21.66	26523	96.2
510	High	NEG	5.41111	None	None	None	None	0	1	3	2	6	L KNEE	M	Knee	20.35	27335	93.1
511	Low	NEG	5.41042	None	None	None	None	0	0	0	0	0	L HIP	F	Hip	6.08	1099	62.5
512	Low	NEG	5.40833	None	None	None	None	0	0	0	0	0	L KNEE	F	Knee	0.61	343	59.1
513	High	POS	4.41597	Vancomycin, Aminoglycoside	None	Enterococcus_faecium, 70%	None	NA	1	3	2	6	JF R KNEE FL	F	Knee	23	16100	81.8
514	Low	NEG	5.40903	None	None	None	None	0	0	0	2	2	R KNEE	F	Knee	0.28	49	85.7
515	Low	NEG	5.40694	None	None	None	None	0	0	0	0	0	L KNEE	M	Knee	0.58	41	19.5
516	Low	NEG	5.40556	None	None	None	None	0	1	0	0	1	L KNEE	M	Knee	8.93	56	37.5
517	High	NEG	5.39931	None	None	None	None	0	1	3	2	6	R KNEE JOINT	F	Knee	9.22	38465	97.7
518	High	POS	4.39444	None	None	Serratia_marcescens, 100%	None	NA	1	3	2	6	L KNEE	M	Knee	35.77	9611	87.5
519	Low	NEG	5.38472	None	None	None	None	0	0	0	0	0	R KNEE	F	Knee	0.34	49	28.6
520	Low	NEG	6.41944	None	None	None	None	0	0	0	0	0	R KNEE	M	Knee	0.09	175	16
521	High	POS	3.425	None	None	Prevotella_bivia, 99%	None	NA	1	3	2	6	R KNEE	F	Knee	23.37	45416	87
522	Low	NEG	6.42222	None	None	None	None	0	0	0	0	0	L KNEE	M	Knee	4.87	35	20
523	High	POS	3.42014	None	None	Staphylococcus_epidermidis 99%	None	NA	0	3	2	5	L KNEE	M	Knee	4.48	7511	86.2
524	High	NEG	4.43819	None	None	None	None	0	1	3	2	6	RT KNEE	F	Knee	39.28	34489	95.2
525	Low	NEG	6.43542	None	None	None	None	0	0	0	0	0	RT KNEE	M	Knee	1.08	49	14.3
526	Low	NEG	6.42083	None	None	None	None	0	0	0	0	0	LEFT KNEE	F	Knee	2.4	56	12.5
527	High	POS	3.39444	None	None	Staphylococcus_capitis, 91%	None	NA	0	3	2	5	L HIP	M	Hip	1.46	19264	96.3
528	Low	NEG	5.38611	None	None	None	None	0	0	0	0	0	R KNEE	F	Knee	0.09	126	50
529	High	POS	3.39375	Methicillin	None	Staphylococcus_epidermidis 79%	None	NA	0	3	2	5	L KNEE	F	Knee	6.64	13111	95.1
530	Low	NEG	5.38264	None	None	None	None	0	0	0	0	0	R KNEE	F	Knee	1.14	357	58.9
531	Low	POS	3.38125	None	None	Acinetobacter_lwoffii, 87%	None	NA	0	0	0	0	L KNEE ASPIRATION	F	Knee	0.33	322	43.5
532	Low	NEG	5.37708	None	None	None	None	0	0	0	0	0	L KNEE	M	Knee	0.32	34	20.6
533	Low	NEG	5.37639	None	None	None	None	0	0	0	0	0	R KNEE	M	Knee	0.6	126	44.4
534	Low	NEG	5.375	None	None	None	None	0	0	0	0	0	R HIP	F	Hip	3.71	49	57.1
535	Low	NEG	5.37083	None	None	None	None	0	0	0	0	0	R KNEE	F	Knee	3.87	161	39.2
536	High	NEG	3.39375	None	None	None	None	0	0	3	2	5	L KNEE FL + T + SWX2	F	Knee	0.53	4053	91.2
537	Low	NEG	5.39097	None	None	None	None	0	0	0	0	0	R KNEE FLUID	M	Knee	0.65	24	4.2
538	Low	NEG	5.38958	None	None	None	None	0	1	0	0	1	L KNEE FLUID	M	Knee	13.18	350	76
539	Low	NEG	5.37778	None	None	None	None	0	0	0	0	0	R KNEE FL + SW	M	Knee	1.23	189	59.3
540	Low	NEG	3.37569	None	None	None	None	0	0	0	0	0	L KNEE FL	F	Knee	1.19	105	40
541	Low	NEG	5.4125	None	None	None	None	0	0	0	0	0	R KNEE	M	Knee	0.02	28	28.6
542	Low	NEG	5.41111	None	None	None	None	0	0	0	0	0	R HIP	F	Hip	0.48	217	32.2
543	Low	NEG	5.41042	None	None	None	None	0	0	0	0	0	L HIP + FL	F	Hip	0.94	56	12.5
544	High	POS	1.40694	None	None	Staphylococcus_aureus, 93%	None	NA	0	3	2	5	R HIP FLUID + SWAB	M	Hip	5.54	14350	93.4
545	Low	NEG	5.40486	None	None	None	None	0	1	0	0	1	R HIP	F	Hip	10.91	70	10
546	Low	NEG	4.40903	None	None	None	None	0	0	0	0	0	R KNEE	F	Knee	0.4	666	19.7
547	Low	NEG	4.44097	None	None	None	None	0	0	0	0	0	L KNEE	F	Knee	1.36	182	11.5
548	Low	NEG	4.43958	None	None	None	None	0	0	0	0	0	RK	M	Knee	0.09	21	23.9
549	Low	NEG	4.43681	None	None	None	None	0	0	0	0	0	L HIP	M	Hip	5.99	47	21.3
550	Low	NEG	4.43194	None	None	None	None	0	0	0	0	0	R KNEE	F	Knee	1.35	1568	64.3
551	Low	NEG	6.43889	None	None	None	None	0	1	0	0	1	LEFT KNEE	M	Knee	10.37	60	13.3
552	High	POS	3.43194	None	None	Serratia_marcescens, 100%	None	NA	1	3	2	6	RT KNEE	M	Knee	99.93	63973	91.5
553	High	POS	2.41875	Methicillin	Staphylococcus_aureus	Staphylococcus_aureus, 100%	None	NA	1	3	0	4	L KNEE	M	Knee	109.44	60942	61.3
554	High	POS	5.41111	None	None	Staphylococcus_lugdunensis, 100%	None	NA	1	3	2	6	L KNEE	M	Knee	29.44	9436	95.1
555	Low	POS	5.40972	None	None	Cutibacterium_acnes, 100%	None	NA	0	0	0	0	L KNEE	M	Knee	1.92	133	15.8
556	Low	NEG	5.41667	None	None	None	None	0	0	0	0	0	L KNEE	M	Knee	0.02	49	28.6
557	Low	POS	2.41458	Methicillin, Aminoglycoside	None	Staphylococcus_epidermidis 99%	None	NA	0	0	2	2	R KNEE	F	Knee	2.89	2751	97.2
558	High	POS	2.41319	None	None	Escherichia_coli, 97%	None	NA	1	3	2	6	L KNEE	F	Knee	30.27	31696	93.1
559	Low	POS	2.41181	None	None	Staphylococcus_epidermidis 100%	None	NA	0	0	2	2	R KNEE	M	Knee	1.73	1043	81.9
560	Low	POS	5.41042	None	None	Acinetobacter_johnsonii, 60%; Bacillus_mycoides, 39%	None	NA	0	0	0	0	R KNEE	F	Knee	0.11	30	23.4
561	High	NEG	5.40903	None	None	None	None	0	1	3	2	6	R KNEE SYNOVIAL	F	Knee	10.93	10003	84.5
562	High	POS	2.40069	None	None	Staphylococcus_epidermidis 100%	None	NA	1	3	2	6	L KNEE	M	Knee	9.31	8008	93.7
563	High	NEG	5.39861	None	None	None	None	0	1	3	2	6	R KNEE	F	Knee	10.66	10654	84.1
564	Low	NEG	6.41528	None	None	None	None	0	0	0	0	0	L KNEE	M	Knee	0.15	15	13.3
565	Low	NEG	6.40417	None	None	None	None	0	1	0	0	1	RT THA (R TIBIA)	F	Hip	12.07	223	23.8
566	Low	NEG	6.40139	None	None	None	None	0	0	0	0	0	R KNEE	M	Knee	0.07	56	7.2
567	Low	NEG	2.43333	None	None	None	None	0	0	0	0	0	L KNEE	F	Knee	0.01	42	0
568	High	POS	1.43125	Methicillin	None	Staphylococcus_epidermidis 97%	None	NA	1	3	2	6	R KNEE	M	Knee	26.29	21882	95.5
569	Low	NEG	2.42986	None	None	None	None	0	0	0	0	0	L KNEE	M	Knee	0.09	35	40
570	High	POS	5.42778	None	None	Corynebacterium striatum, 99%	None	NA	1	3	0	4	L KNEE	M	Knee	7.13	9261	79.7
571	High	POS	1.40625	None	None	Staphylococcus_capitis, 100%	None	NA	1	3	2	6	R KNEE FLUID	M	Knee	34.1	105770	97.4
572	High	POS	1.40278	None	Staphylococcus_aureus	Staphylococcus_aureus, 100%	None	NA	1	3	2	6	R KNEE	M	Knee	118.49	107191	89.8
573	Low	NEG	4.39653	None	None	None	None	0	0	0	0	0	L KNEE	M	Knee	0.64	133	36.8
574	Low	NEG	4.39583	None	None	None	None	0	0	0	0	0	R KNEE	M	Knee	1.5	336	20.8
575	Low	NEG	4.39306	None	None	None	None	0	0	0	0	0	UNSPECIFIED KNEE	F	Knee	6.66	2590	79.7
576	Low	NEG	3.38264	None	None	None	None	0	0	0	0	0	R KNEE	M	Knee	2.75	21	33.4
577	Low	NEG	3.37847	None	None	None	None	0	0	0	0	0	L KNEE	M	Knee	0.11	101	5.9
578	Low	NEG	6.37639	None	None	None	None	0	1	0	2	3	R HIP	M	Hip	20.39	154	81.9
579	High	NEG	5.39097	None	None	None	None	0	1	3	2	6	L HIP	F	Hip	36.94	16978	88.9
580	Low	NEG	5.38681	None	None	None	None	0	0	0	0	0	R KNEE	M	Knee	0.55	84	8.3
581	Low	NEG	5.37986	None	None	None	None	0	0	0	0	0	R KNEE	F	Knee	2.11	350	48
582	Low	NEG	5.37847	None	None	None	None	0	0	0	0	0	R KNEE	F	Knee	0.21	17	17.7
583	High	NEG	3.4125	None	None	None	None	0	0	3	2	5	R KNEE	F	Knee	1.48	6804	97.3
584	Low	NEG	3.41042	None	None	None	None	0	0	0	0	0	L KNEE SYNOVIAL FL	F	Knee	1.05	19	10.5
585	High	POS	1.40903	None	None	Staphylococcus epidermidis 73%; Staphylococcus lugdunensis, 17%	None	2	1	3	2	6	R KNEE	M	Knee	35.86	12838	96.8
586	High	NEG	3.40556	None	None	None	None	0	1	3	2	6	R KNEE	M	Knee	8.34	5607	81.9
587	Low	NEG	3.40417	None	None	None	None	0	1	0	0	1	L KNEE	M	Knee	7.43	700	65
588	Low	NEG	3.40278	None	None	None	None	0	0	0	0	0	R HIP	M	Hip	3.19	245	68.6
589	Low	NEG	3.41181	None	None	None	None	0	0	0	0	0	R KNEE	M	Knee	0.11	595	31.8
590	High	POS	1.40069	None	None	Streptococcus mitis, 100%	None	1	1	3	2	6	L KNEE	M	Knee	13.7	46893	94.9
591	Low	NEG	5.45208	None	None	None	None	0	0	0	0	0	R KNEE	F	Knee	1.92	24	50
592	Low	NEG	5.44931	None	None	None	None	0	1	0	0	1	R HIP	M	Hip	7.48	1141	57
593	Low	NEG	5.44653	None	None	None	None	0	0	0	0	0	R KNEE	M	Knee	0.33	64	15.6
594	Low	NEG	2.44306	None	None	None	None	0	0	0	0	0	R KNEE	F	Knee	0.08	39	10.3
595	Low	NEG	4.45903	None	None	None	None	0	0	0	0	0	L KNEE	M	Knee	1.05	88	19.3
596	Low	NEG	4.45625	None	None	None	None	0	1	0	0	1	R HIP	M	Hip	33.43	161	39.2
597	Low	NEG	4.45208	None	None	None	None	0	1	0	2	3	L KNEE FLUID	M	Knee	10.97	2296	93
598	High	NEG	4.45139	None	None	None	None	0	1	3	2	6	R KNEE FLUID	M	Knee	51.91	41293	97.9
599	Low	NEG	4.44792	None	None	None	None	0	0	0	0	0	L KNEE FLUID	F	Knee	0.4	532	67.1
600	Low	NEG	4.44653	None	None	None	None	0	0	0	0	0	L KNEE FLUID	F	Knee	2.54	40	60
601	Low	NEG	4.44653	None	None	None	None	0	0	0	0	0	L KNEE JOINT FL+SW	F	Knee	0.21	490	14.3
602	Low	NEG	4.44028	None	None	None	None	0	0	0	0	0	L KNEE FL	M	Knee	0.21	42	14.3
603	Low	NEG	4.43889	None	None	None	None	0	0	0	0	0	R KNEE FL	M	Knee	0.37	63	11.1
604	Low	NEG	3.43056	None	None	None	None	0	0	0	0	0	L KNEE	F	Knee	1.37	469	28.4
605	Low	NEG	3.43333	None	None	None	None	0	0	0	0	0	L KNEE	M	Knee	0.85	49	71.4
606	Low	NEG	3.42917	None	None	None	None	0	0	0	0	0	R KNEE	F	Knee	0.65	998	50.9
607	Low	NEG	3.42708	None	None	None	None	0	0	0	0	0	L KNEE	F	Knee	0.54	230	12.6
608	Low	NEG	3.42431	None	None	None	None	0	0	0	0	0	R HIP ASPIRATION	M	Hip	6.19	89	49.4
609	Low	NEG	3.43542	None	None	None	None	0	0	0	0	0	L KNEE	F	Knee	0.8	363	46.5
610	High	POS	2.44861	Methicillin, Aminoglycoside	None	Staphylococcus_epidermidis 99%	None	1	1	3	2	6	R HIP	M	Hip	38.16	35560	89.5
611	Low	NEG	5.44653	None	None	None	None	0	0	0	0	0	L KNEE FLUID	F	Knee	0.28	98	28.5
612	Low	NEG	5.44375	None	None	None	None	0	0	0	0	0	R KNEE	F	Knee	3.37	994	78.1
613	Low	NEG	2.43681	None	None	None	None	0	0	0	0	0	R HIP	F	Hip	1.01	357	72.6
614	High	POS	2.43056	None	None	Staphylococcus_capitis, 97%	None	1	1	3	2	6	R TKA	M	Knee	22.56	21350	85.4
615	Low	NEG	2.41875	None	None	None	None	0	1	0	2	3	L KNEE SYNOVIAL FL	M	Knee	13.75	614	84.8
616	Low	NEG	6.42639	None	None	None	None	0	1	0	0	1	L KNEE FLUID + SW	M	Knee	57.37	1624	79.3
617	Low	POS	1.42431	None	None	Cutibacterium_acnes, 63%; Staphylococcus_saccharolyticus, 16%; Staphylococcus_epidermidis 14%	None	3	0	0	0	0	R KNEE	M	Knee	3.4	896	78.2
618	High	POS	1.41875	Vancomycin	None	Enterococcus_faecium, 100%	None	1	1	3	2	6	R HIP FLUID +SW	F	Hip	51.24	18291	94.1
619	Low	NEG	6.41597	None	None	None	None	0	0	3	0	3	L KNEE FL	M	Knee	0.02	3189	12.3
620	High	NEG	5.39306	None	None	None	None	0	1	3	2	6	R KNEE SYNOVIAL FL	F	Knee	31.87	6776	90
621	Low	NEG	5.38472	None	None	None	None	0	1	0	2	3	L TOTAL KNEE	F	Knee	8.86	329	82.9
622	Low	NEG	5.38264	None	None	None	None	0	0	0	0	0	L KNEE	F	Knee	0.88	134	54.5
623	Low	NEG	5.38125	None	None	None	None	0	0	0	0	0	R KNEE	M	Knee	1.34	63	66.7
624	Low	NEG	6.44236	None	None	None	None	0	0	0	0	0	R KNEE	M	Knee	1.14	525	61.3
625	Low	POS	3.43958	None	None	Escherichia_coli, 36%; Anaerococcus_vaginalis, 27%; Enterococcus_faecalis, 9%; Peptoniphilus_harei, 8%; Prevotella_bivia, 5%	None	5	0	0	0	0	L KNEE	F	Knee	4.78	364	75
626	Low	NEG	5.42014	None	None	None	None	0	0	0	0	0	L HIP	F	Hip	2.66	1176	75.6
627	Low	NEG	5.41806	None	None	None	None	0	0	0	0	0	L KNEE	M	Knee	2.82	484	56.8
628	Low	NEG	5.40208	None	None	None	None	0	0	0	0	0	L KNEE	F	Knee	0.7	196	35.7
629	Low	NEG	3.44514	None	None	None	None	0	0	0	2	2	LEFT KNEE SYNOVIAL FLUID 13:55	M	Knee	2.98	14	92.9
630	Low	NEG	5.4625	None	None	None	None	0	0	0	0	0	R KNEE	F	Knee	5.62	385	16.3
631	Low	NEG	5.45764	None	None	None	None	0	0	0	0	0	L KNEE	M	Knee	0.28	38	13.2
632	Low	NEG	5.46528	None	None	None	None	0	1	0	0	1	JF L KNEE FLUID	M	Knee	8.42	308	75
633	Low	NEG	4.44722	None	None	None	None	0	0	0	0	0	L HIP	F	Hip	0.01	121	19
634	Low	NEG	4.44375	None	None	None	None	0	0	0	0	0	R KNEE SYNOVIAL FL	M	Knee	0.48	25	52
635	Low	NEG	4.44028	None	None	None	None	0	0	0	0	0	L KNEE	M	Knee	0.09	25	8
636	High	POS	4.43403	None	None	Streptococcus_mitis, 55%; Streptococcus_oralis, 31%; Acinetobacter_guillouiae, 6%; Cutibacterium_acnes, 6%	None	NA	1	3	2	6	R KNEE	M	Knee	8.43	29178	95.8
637	High	NEG	7.41181	None	None	None	None	0	1	3	2	6	R KNEE ASPIRATE	M	Knee	13.29	16492	96.9
638	Low	NEG	6.43889	None	None	None	None	0	0	0	0	0	R TKA	M	Knee	0.01	84	8.3
639	Low	NEG	6.45694	None	None	None	None	0	0	0	0	0	R KNEE	F	Knee	0.06	105	20
640	Low	POS	6.45556	None	None	Blautia_hansenii, 39%; Holdemanella_biformis, 16%; Bacteriodes_coprophilus, 10%; Clostridium_perfringens, 9%	None	NA	0	0	0	0	R KNEE	M	Knee	2.79	385	54.6
641	Low	NEG	6.45347	None	None	None	None	0	0	0	0	0	L KNEE	M	Knee	1.06	21	33.4
642	High	POS	2.45208	None	None	Staphylococcus_aureus, 93%	None	1	1	3	2	6	R KNEE	M	Knee	57.66	17409	93.8
643	High	POS	2.45069	None	None	Staphylococcus_aureus, 92%	None	1	1	3	2	6	L KNEE	M	Knee	47.37	11949	95.2
644	High	POS	2.45	None	None	Pseudomonas_aeruginosa, 73%	None	1	1	3	0	4	R KNEE	F	Knee	22.3	40992	41
645	Low	NEG	3.47083	None	None	None	None	0	0	0	2	2	R HIP	M	Hip	0.09	1115	94.7
646	Low	NEG	3.46597	None	None	None	None	0	1	0	0	1	R KNEE	F	Knee	27.78	539	74
647	Low	NEG	3.46389	None	None	None	None	0	0	0	0	0	R KNEE	M	Knee	0.13	63	44.5
648	Low	NEG	3.46042	None	None	None	None	0	0	0	0	0	R KNEE	F	Knee	0.26	105	46.7
649	High	POS	1.44792	None	Staphylococcus_aureus_x000D_	Staphylococcus_aureus, 100%	None	1	1	3	2	6	R TKA	F	Knee	160	64596	87.2
650	Low	NEG	2.34028	None	None	None	None	0	0	0	0	0	RT KNEE	M	Knee	0.17	14	7.2
651	High	POS	5.32431	None	None	Streptococcus_agalactiae, 100%	None	1	1	3	2	6	L KNEE	M	Knee	11.58	12208	95.9
652	Low	NEG	4.38611	None	None	None	None	0	0	0	0	0	R KNEE	M	Knee	0.07	63	22.2
653	High	POS	4.38472	None	None	Staphylococcus_epidermidis 100%	None	1	1	3	2	6	R KNEE	M	Knee	106.89	96635	97.3
654	Low	NEG	4.40625	None	None	None	None	0	0	0	0	0	L HIP	M	Hip	0.01	588	38.1
655	Low	NEG	4.40208	None	None	None	None	0	0	0	0	0	L HIP	F	Hip	0.51	112	27.7
656	Low	NEG	5.41111	None	None	None	None	0	0	0	0	0	R KNEE	F	Knee	0.07	39	41.1
657	Low	NEG	6.41111	None	None	None	None	0	0	0	2	2	R KNEE	F	Knee	0.01	16	81.2
658	High	POS	1.40694	None	None	Streptococcus_mitis, 99%	None	1	1	3	2	6	R HIP	M	Hip	28.39	109340	94.9
659	Low	NEG	5.40833	None	None	None	None	0	0	0	0	0	L KNEE	M	Knee	4.8	100	25
660	Low	NEG	5.40694	None	None	None	None	0	0	0	0	0	R KNEE	F	Knee	0.2	136	15.4
661	Low	NEG	6.40972	None	None	None	None	0	0	0	0	0	R KNEE SYNOVIAL FL	F	Knee	1.49	42	26.2
662	Low	NEG	6.41736	None	None	None	None	0	0	0	2	2	L KNEE	M	Knee	0.14	10	80
663	Low	NEG	6.41042	None	None	None	None	0	0	0	0	0	R KNEE	M	Knee	0.57	68	7.4
664	Low	NEG	3.37361	None	None	None	None	0	0	0	0	0	R KNEE	M	Knee	2.35	42	21.5
665	Low	NEG	5.37083	None	None	None	None	0	0	0	0	0	R KNEE	F	Knee	0.06	160	19.4
666	Low	NEG	5.38472	None	None	None	None	0	0	0	0	0	L KNEE	M	Knee	0.14	56	75
667	High	POS	2.38264	None	None	Prevotella_bivia, 92%	None	1	0	3	2	5	R KNEE	F	Knee	5.6	5096	96.4
668	High	POS	2.37569	Methicillin, Aminoglycoside	None	Staphylococcus epidermidis 78%; Staphylococcus lugdunensis, 21%	None	2	1	3	2	6	R KNEE	M	Knee	19.03	6545	96.1
669	Low	NEG	5.37361	None	None	None	None	0	0	0	0	0	L KNEE	F	Knee	0.62	175	56
670	Low	NEG	5.37153	None	None	None	None	0	0	0	2	2	R KNEE	M	Knee	0.64	182	88.5
671	High	POS	2.37014	None	None	Campylobacter_ureolyticus, 57%; Proteus_mirabilis, 21%; Morganella_morganii, 17%; Escherichia_coli, 3%	None	4	1	3	2	6	L HIP	F	Hip	17.22	14875	97
672	Low	NEG	4.52917	None	None	None	None	0	0	0	0	0	L KNEE	F	Knee	0.01	89	7.9
673	Low	NEG	3.42014	None	None	None	None	0	0	0	0	0	KNEE	M	Knee	0.76	530	18.8
674	Low	NEG	3.41875	None	None	None	None	0	0	3	0	3	LEFT HIP JOINT	M	Hip	0.16	7665	73.5
675	Low	NEG	5.38472	None	None	None	None	0	0	0	0	0	L KNEE	F	Knee	0.29	38	15.8
676	Low	NEG	5.38333	None	None	None	None	0	0	0	0	0	R KNEE	F	Knee	0.35	185	18.4
677	High	POS	4.38125	None	None	Staphylococcus_epidermidis 100%	None	1	1	3	2	6	L KNEE	M	Knee	26.26	15316	96.2
678	Low	NEG	5.39236	None	None	None	None	0	0	0	0	0	R KNEE	F	Knee	0.65	113	18.6
679	Low	NEG	6.40347	None	None	None	None	0	0	0	0	0	L KNEE	M	Knee	0.1	33	9.1
680	Low	NEG	6.40139	None	None	None	None	0	0	0	0	0	R KNEE	M	Knee	0.03	91	38.4
681	Low	NEG	6.39444	None	None	None	None	0	0	0	0	0	R KNEE	F	Knee	0.53	98	10.2
682	Low	NEG	6.39306	None	None	None	None	0	0	0	0	0	UF R KNREE	F	Knee	1.58	600	36.5
683	Low	NEG	6.39028	None	None	None	None	0	0	0	0	0	L KNEE	F	Knee	0.05	37	5.4
684	Low	NEG	6.38819	None	None	None	None	0	0	0	0	0	R HIP FLUID	M	Hip	0.03	320	22.8
685	High	POS	3.38333	Aminoglycoside	None	Staphylococcus_epidermidis 100%	None	1	0	3	2	5	R KNEE	F	Knee	1.71	5264	94.8
686	Low	NEG	5.33542	None	None	None	None	0	0	0	0	0	R KNEE	F	Knee	0.06	70	30
687	Low	NEG	5.33403	None	None	None	None	0	0	0	0	0	RT KNEE	M	Knee	0.01	101	10.9
688	Low	NEG	5.33056	None	None	None	None	0	0	0	0	0	LT HIP	M	Hip	0.91	294	30.9
689	Low	NEG	5.325	None	None	None	None	0	0	0	0	0	RIGHT KNEE	F	Knee	0.24	191	30.4
690	High	POS	2.35903	None	Streptococcus_agalactiae	Streptococcus_agalactiae, 99%	None	1	1	3	2	6	R KNEE	M	Knee	49.82	68187	89
691	Low	NEG	4.46806	None	None	None	None	0	0	0	0	0	R KNEE	F	Knee	0.01	120	28.3
692	Low	NEG	3.37361	None	None	None	None	0	0	0	0	0	R KNEE	F	Knee	0.2	159	18.2
693	Low	POS	7.37222	None	None	None	Aureobasidium_pullulans, 91%	1	0	0	0	0	L KNEE	M	Knee	0.01	124	29
694	Low	NEG	3.36944	None	None	None	None	0	0	0	0	0	L KNEE SYNOVIAL FL	F	Knee	1.41	255	27.1
695	Low	NEG	6.45347	None	None	None	None	0	0	0	0	0	L HIP TKA	F	Hip	0.04	498	37
696	Low	NEG	5.39375	None	None	None	None	0	0	0	0	0	R KNEE	F	Knee	1.88	238	79.4
697	Low	NEG	5.39167	None	None	None	None	0	0	0	0	0	L KNEE	F	Knee	1.38	77	42.8
698	Low	POS	4.37431	None	None	Exiguobacterium_sibiricum, 40%; Staphylococcus_epidermidis 30%; Corynebacterium_tuberculostearicum, 29%	None	3	0	0	0	0	R KNEE	F	Knee	0.01	52	32.7
699	Low	NEG	6.39306	None	None	None	None	0	0	0	0	0	R KNEE	F	Knee	5.47	388	36.6
700	High	POS	3.38403	None	None	Lactobacillus_agilis, 38%; Lactobacillus_reuteri, 13%; Turicibacter_sanguinis, 8%; Lactobacillus_salivarius, 7%; Lactobacillus_kitasatonis, 7%, Lactobacillus_pontis, 5%; Clostridium_disporicum, 3%; Lactobacillus_delbrueckii, 3%; Corynebacterium_freiburgense, 2%	None	9	1	3	2	6	R KNEE	M	Knee	9.51	74550	94.9
701	Low	POS	6.38125	None	None	Cutibacterium_acnes, 100%	None	1	0	0	0	0	R KNEE	F	Knee	3.97	681	32.7
702	Low	POS	3.37778	None	None	Cutibacterium_acnes, 76%; Klebsiella_pneumoniae, 23%	None	2	0	0	0	0	UF L KNEE	F	Knee	0.25	2612	35.3
703	High	POS	3.37361	None	None	Staphylococcus_epidermidis 100%	None	1	1	3	2	6	R KNEE	M	Knee	53.9	62937	95.9
704	Low	NEG	4.38264	None	None	None	None	0	0	0	2	2	R KNEE	M	Knee	1.41	602	84.9
705	Low	NEG	6.38125	None	None	None	None	0	0	0	0	0	R KNEE	F	Knee	0.25	22	27.3
706	Low	NEG	6.37917	None	None	None	None	0	0	0	0	0	R KNEE FL	M	Knee	0.35	4	25
707	High	POS	3.37847	None	None	Staphylococcus_epidermidis 100%	None	1	1	3	2	6	L KNEE	M	Knee	42.09	25284	92.9
708	Low	NEG	6.37569	None	None	None	None	0	0	0	0	0	L KNEE	F	Knee	0.23	27	14.8
709	Low	NEG	3.39375	None	None	None	None	0	0	0	0	0	L KNEE	F	Knee	0.04	16	24.9
710	Low	NEG	3.38542	None	None	None	None	0	0	0	0	0	R HIP	M	Hip	1.96	462	66.6
711	Low	NEG	4.49375	None	None	None	None	0	0	0	0	0	L TOTAL KNEE	F	Knee	0.82	101	55.5
712	Low	NEG	4.49236	None	None	None	None	0	0	0	0	0	L KNEE	F	Knee	0.18	67	17.9
713	Low	POS	4.49167	None	None	Corynebacterium_amycolatum, 53%; Acinetobacter_guillouiae, 46%	None	2	0	0	0	0	L KNEE SYNOVIAL FL	F	Knee	1.02	84	8.3
714	Low	NEG	4.48889	None	None	None	None	0	0	0	0	0	L KNEE	M	Knee	1.44	84	65.5
715	Low	NEG	4.48611	None	None	None	None	0	0	0	0	0	R KNEE	M	Knee	0.6	57	21
716	Low	NEG	1.40833	None	None	None	None	0	0	0	0	0	L KNEE	M	Knee	2.6	210	63.4
717	High	POS	1.40278	None	None	Staphylococcus_capitis, 99%	None	1	1	3	2	6	L KNEE	M	Knee	18.43	36799	92
718	Low	NEG	5.42917	None	None	None	None	0	0	0	0	0	R KNEE	F	Knee	2.36	168	50
719	High	POS	1.42778	None	None	Staphylococcus_lugdunensis, 94%	None	1	1	3	2	6	R KNEE	M	Knee	12.19	6608	93.3
720	Low	NEG	5.42708	None	None	None	None	0	0	0	0	0	L KNEE	F	Knee	0.81	448	54.7
721	Low	NEG	4.40764	None	None	None	None	0	0	0	0	0	R KNEE FLUID	M	Knee	0.16	21	66.7
722	Low	NEG	4.40069	None	None	None	None	0	1	0	0	1	R KNEE	M	Knee	12.92	17	41.2
723	Low	NEG	4.39792	None	None	None	None	0	1	0	2	3	R HIP	M	Hip	52.87	2737	98
724	Low	NEG	6.37222	None	None	None	None	0	0	0	0	0	R KNEE	M	Knee	0.61	145	9.6
725	High	NEG	6.36597	None	None	None	None	0	1	3	2	6	R KNEE SYNOVIAL FLUID	F	Knee	43.54	76489	91.5
726	Low	NEG	6.36458	None	None	None	None	0	0	0	0	0	R KNEE	M	Knee	0.73	78	17.9
727	Low	NEG	5.46042	None	None	None	None	0	0	0	0	0	OF L KNEE	M	Knee	0.07	323	37.1
728	High	POS	5.45764	None	None	Prevotella_melaninogenica, 91%	None	1	1	3	2	6	R KNEE	F	Knee	41.15	24780	96.1
729	Low	NEG	5.45625	None	None	None	None	0	0	0	0	0	L KNEE	F	Knee	5.73	57	22.8
730	High	POS	5.52014	Methicillin	Staphylococcus_aureus_x000D_	Staphylococcus_aureus, 100%	None	1	1	3	2	6	L KNEE	F	Knee	59.46	126056	93.7
731	High	POS	4.46181	None	None	Staphylococcus_epidermidis 92%	None	1	1	3	2	6	L KNEE	M	Knee	20.68	33019	97.6
732	Low	NEG	4.46042	None	None	None	None	0	1	0	0	1	L KNEE	F	Knee	11.71	126	16.7
733	Low	NEG	4.45625	None	None	None	None	0	0	0	0	0	R KNEE	M	Knee	3.65	63	33.4
734	Low	NEG	3.42917	None	None	None	None	0	0	0	0	0	L KNEE JOINT	F	Knee	1.15	252	44.5
735	Low	NEG	3.42361	None	None	None	None	0	1	0	0	1	L KNEE	F	Knee	15.75	273	74.3
736	Low	NEG	5.52014	None	None	None	None	0	0	0	2	2	L KNEE	M	Knee	0.02	707	85.7
737	Low	NEG	5.51806	None	None	None	None	0	0	0	0	0	L KNEE	M	Knee	1.56	168	15.5
738	High	POS	4.38194	None	None	Staphylococcus_epidermidis 93%	None	1	1	3	2	6	L KNEE	F	Knee	35.73	22253	97.1
739	Low	NEG	4.39236	None	None	None	None	0	0	0	0	0	L KNEE	M	Knee	1.15	224	37.5
740	Low	NEG	3.35764	None	None	None	None	0	0	0	0	0	R KNEE	F	Knee	0.12	44	22.8
741	Low	NEG	6.35417	None	None	None	None	0	0	0	0	0	R HIP	F	Hip	1.57	77	45.4
742	Low	NEG	3.35278	None	None	None	None	0	0	0	0	0	R HIP	M	Hip	4.05	65	27.7
743	Low	NEG	6.35139	None	None	None	None	0	0	0	0	0	R KNEE	F	Knee	3.72	1596	68.9
744	Low	NEG	5.34097	None	None	None	None	0	0	0	0	0	L KNEE	F	Knee	0.6	203	38
745	Low	NEG	3.35903	None	None	None	None	0	0	0	0	0	L KNEE	F	Knee	0.02	798	43.9
746	High	POS	1.38611	None	None	Staphylococcus_aureus, 99%	None	1	1	3	2	6	LEFT KNEE SYNOVIAL FLUID	M	Knee	73.8	92449	95.5
747	Low	NEG	3.37569	None	None	None	None	0	0	0	0	0	LT KNEE	M	Knee	0.91	56	62.5
748	Low	NEG	5.37153	None	None	None	None	0	0	0	0	0	R KNEE	M	Knee	0.07	567	24.7
749	Low	NEG	5.37014	None	None	None	None	0	0	0	0	0	R KNEE	F	Knee	1.84	322	21.8
750	Low	NEG	5.36111	None	None	None	None	0	0	0	0	0	R KNEE	F	Knee	0.04	189	48.2
751	Low	NEG	2.35556	None	None	None	None	0	0	0	0	0	R KNEE	M	Knee	0.11	21	66.7
752	Low	NEG	5.35347	None	None	None	None	0	0	0	0	0	RT KNEE	F	Knee	0.27	14	0
753	Low	NEG	5.34931	None	None	None	None	0	0	0	0	0	R KNEE	M	Knee	0.11	21	33.4
754	Low	POS	4.37986	None	None	Prevotella_bivia, 98%	None	1	0	0	0	0	R KNEE JOINT	F	Knee	2.34	2660	72.9
755	Low	NEG	4.37014	None	None	None	None	0	0	0	0	0	L KNEE FL	M	Knee	0.42	41	14.7
756	High	POS	4.35764	None	None	Enterococcus_faecalis, 85%; Actinomyces_neuii, 14%	None	2	1	3	2	6	L KNEE SYNOVIAL FL	M	Knee	49.68	23366	91.2
757	Low	NEG	4.375	None	None	None	None	0	0	0	0	0	R ILIOPSOAS BURSA	F	Hip	0.23	1834	48.1
758	Low	NEG	4.37222	None	None	None	None	0	0	0	0	0	L KNEE FLUID	F	Knee	0.01	34	38.2
759	High	POS	6.50278	Vancomycin	None	Enterococcus_faecalis, 42%	None	1	1	3	2	6	FLUID R KNEE	F	Knee	14.51	29617	94.5
760	Low	NEG	6.50139	None	None	None	None	0	0	0	0	0	R KNEE	F	Knee	0.01	611	30.8
761	Low	NEG	3.51944	None	None	None	None	0	1	0	0	1	R KNEE	M	Knee	9.1	1337	63.4
762	Low	NEG	3.51528	None	None	None	None	0	0	0	0	0	J F R KNEE FL	M	Knee	2.91	1687	76.3
763	Low	NEG	6.51319	None	None	None	None	0	0	0	0	0	L KNEE	F	Knee	1.89	2912	78.3
764	Low	NEG	6.51042	None	None	None	None	0	0	0	0	0	L KNEE	F	Knee	0.13	532	21.1
765	Low	NEG	5.47778	None	None	None	None	0	0	0	0	0	R KNEE	M	Knee	2.9	217	29
766	Low	NEG	5.47708	None	None	None	None	0	0	0	0	0	R KNEE	F	Knee	0.04	67	25.4
767	Low	NEG	5.46806	None	None	None	None	0	0	0	0	0	R KNEE	M	Knee	0.83	70	10
768	Low	NEG	5.46597	None	None	None	None	0	0	0	0	0	R KNEE	F	Knee	2.13	655	55.8
769	Low	NEG	3.40903	None	None	None	None	0	0	0	0	0	L KNEE	M	Knee	1.13	374	53.4
770	Low	NEG	3.40694	None	None	None	None	0	0	0	0	0	R KNEE	M	Knee	0.69	58	15.5
771	Low	NEG	3.40486	None	None	None	None	0	0	0	0	0	L KNEE	F	Knee	4.52	313	35.5
772	Low	NEG	3.40347	None	None	None	None	0	0	0	0	0	L KNEE	M	Knee	0.16	81	11.1
773	Low	NEG	3.39931	None	None	None	None	0	0	0	0	0	L KNEE	M	Knee	0.96	98	50
774	High	POS	3.40625	None	Streptococcus_agalactiae	Streptococcus_agalactiae, 84%; Cutibacterium_acnes, 2%	None	2	1	3	2	6	R KNEE	M	Knee	8.75	5453	94
775	Low	NEG	4.38264	None	None	None	None	0	0	0	2	2	R KNEE SYNOVIAL FL	F	Knee	0.7	2282	94.5
776	Low	POS	4.37917	None	None	None	Candida_orthopsilosis, 91%; Candida_albicans, 8%	2	1	0	2	3	L KNEE	M	Knee	29.06	785	80
777	Low	NEG	4.33611	None	None	None	None	0	0	0	0	0	R KNEE	F	Knee	1.22	26	30.8
778	Low	NEG	4.33542	None	None	None	None	0	0	0	0	0	L KNEE	F	Knee	0.36	11	18.2
779	Low	NEG	4.33333	None	None	None	None	0	0	0	0	0	R KNEE	F	Knee	0.63	8	12.5
780	Low	NEG	4.37917	None	None	None	None	0	0	0	0	0	L KNEE SYNOVIAL	F	Knee	2.24	54	25.9
781	Low	NEG	4.36944	None	None	None	None	0	0	0	0	0	L KNEE	M	Knee	0.78	2020	15.9
782	Low	NEG	3.40417	None	None	None	None	0	0	0	0	0	R KNEE	M	Knee	0.08	244	18.9
783	High	NEG	3.39931	None	None	None	None	0	1	3	2	6	L KNEE	M	Knee	13.15	3983	82.9
784	Low	NEG	3.39792	None	None	None	None	0	1	0	2	3	L KNEE SYNOVIAL	M	Knee	8.15	2903	94.3
785	Low	NEG	3.39583	None	None	None	None	0	0	0	0	0	L KNEE	M	Knee	0.19	126	21.4
786	High	POS	6.39306	None	Staphylococcus_aureus_x000D_	Staphylococcus_aureus, 97%	None	1	1	3	2	6	L KNEE	M	Knee	24.67	30422	94.6
787	Low	NEG	5.36528	None	None	None	None	0	0	0	0	0	R KNEE	M	Knee	0.1	27	11.1
788	High	NEG	5.36319	None	None	None	None	0	1	3	2	6	L KNEE	F	Knee	10.97	7910	83.9
789	High	POS	2.3625	None	None	Staphylococcus_epidermidis 95%	None	1	1	3	2	6	L KNEE	F	Knee	17.32	14168	92.9
790	High	POS	2.36111	None	Staphylococcus_aureus_x000D_	Staphylococcus_aureus, 100%	None	1	1	3	2	6	R KNEE	M	Knee	66.55	55062	89.6
791	Low	NEG	5.35972	None	None	None	None	0	0	0	0	0	L KNEE	F	Knee	0.03	24	16.7
792	Low	NEG	5.35833	None	None	None	None	0	0	0	0	0	R HIP	M	Hip	1.46	37	10.8
793	Low	POS	2.37639	None	None	None	Malassezia_restrica, 100%	1	0	0	0	0	R KNEE	M	Knee	0.49	69	26.1
794	Low	NEG	2.36944	None	None	None	None	0	0	0	0	0	L KNEE	F	Knee	0.8	217	64.5
795	Low	NEG	2.3625	None	None	None	None	0	0	0	0	0	R KNEE	M	Knee	0.94	455	26.2
796	Low	NEG	2.36458	None	None	None	None	0	0	0	0	0	LT KNEE	M	Knee	0.62	490	41.4
797	Low	NEG	2.39236	None	None	None	None	0	0	0	0	0	R KNEE FLUID	M	Knee	0.07	124	75.8
798	Low	NEG	2.40972	None	None	None	None	0	0	0	0	0	L KNEE	F	Knee	1.91	82	34.1
799	High	POS	1.40556	None	None	Staphylococcus_lugdunensis, 100%	None	1	1	3	2	6	L HIP SYNOVIAL	M	Hip	58.68	13118	80.7
800	Low	NEG	2.40347	None	None	None	None	0	0	0	0	0	L HIP	M	Hip	2.46	52	26.9
801	Low	NEG	2.4	None	None	None	None	0	0	0	0	0	L KNEE	F	Knee	0.13	413	62
802	High	POS	1.39722	None	Staphylococcus_aureus_x000D_	Staphylococcus_aureus, 96%; Staphylococcus_epidermidis 3%	None	2	1	3	2	6	L KNEE	F	Knee	49.1	72093	91.6
803	Low	POS	2.41181	None	None	Cutibacterium_acnes, 100%	None	1	0	0	0	0	L KNEE	M	Knee	0.72	63	11.1
804	Low	NEG	2.41111	None	None	None	None	0	0	0	0	0	L HIP	F	Hip	1.01	131	16.8
805	High	POS	1.37361	Methicillin	None	Staphylococcus_haemolyticus, 100%	None	1	0	3	2	5	R KNEE	M	Knee	6.12	8449	97
806	Low	NEG	4.37222	None	None	None	None	0	0	0	0	0	L KNEE	F	Knee	1.37	980	70
807	Low	NEG	4.37083	None	None	None	None	0	0	0	0	0	R KNEE	F	Knee	0.56	84	29.8
808	Low	POS	4.37014	None	None	Staphylococcus_hominis, 100%	None	1	0	0	0	0	L KNEE	M	Knee	0.97	21	33.4
809	Low	NEG	3.39167	None	None	None	None	0	0	0	0	0	L KNEE	M	Knee	3.31	392	53.5
810	Low	NEG	3.38681	None	None	None	None	0	0	0	0	0	R KNEE	F	Knee	0.07	80	15
811	High	POS	3.38472	None	None	Staphylococcus_lugdunensis, 100%	None	1	1	3	2	6	R KNEE	M	Knee	17.72	94255	96.5
812	Low	NEG	3.38194	None	None	None	None	0	0	0	0	0	L HIP	M	Hip	0.08	154	27.3
813	Low	POS	2.40694	None	None	Candidatus_Burkholderia_crenata, 72%; Achromobacter_xylosoxidans, 27%	None	2	0	0	0	0	R KNEE SYNOVIAL	F	Knee	0.32	959	10
814	High	POS	2.40556	None	None	Streptococcus_canis, 93%	None	1	1	3	2	6	L KNEE	M	Knee	17.5	14427	97.7
815	Low	NEG	2.40347	None	None	None	None	0	0	0	0	0	PT KNEE FLUID	F	Knee	0.44	34	41.2
816	Low	NEG	2.39861	None	None	None	None	0	0	0	0	0	R KNEE	M	Knee	1.39	42	66.6
817	Low	NEG	2.37014	None	None	None	None	0	0	0	0	0	R KNEE SYNOVIAL FLUID	F	Knee	1.82	70	20
818	High	POS	2.36806	None	None	Staphylococcus_pettenkoferi, 98%	None	1	0	3	2	5	R KNEE	M	Knee	2.45	4179	91
819	Low	NEG	3.42153	None	None	None	None	0	0	0	0	0	LEFT KNEE	F	Knee	0.07	49	42.8
820	Low	NEG	3.40486	None	None	None	None	0	0	0	0	0	RIGHT HIP	F	Hip	0.81	1533	78.1
821	Low	POS	3.39653	None	None	Corynebacterium_matruchotii, 21%; Leptotrichia_hofstadii, 11%; Streptococcus_sanguinis, 9%; Veillonella_parvula, 5%; Corynebacterium_maris, 4%;Streptococcus_timonensis, 4%; Fusobacterium_nucleatum, 4%; Actinomyces_oris, 3%; Terrahaemophilus_aromaticivorans, 3%; Leptorichia_buccalis, 3%; Capnocytophaga_ochracea, 2%; Prevotella_melaninogenica, 2%; Prevotella_copri, 2%; Leptotricia_wadei, 2%	None	14	0	0	0	0	LEFT KNEE	M	Knee	0.4	245	54.3
822	High	POS	3.39167	None	None	Corynebacterium_striatum, 91%; Enterobacter_cloacae, 8%	None	2	0	3	2	5	R KNEE	M	Knee	5.72	7217	95.2
823	Low	NEG	5.41111	None	None	None	None	0	1	0	0	1	SYNOVIAL R KNEE	F	Knee	64.99	8	37.5
824	Low	NEG	5.44375	None	None	None	None	0	0	0	0	0	LT KNEE	M	Knee	2.25	91	38.4
825	Low	NEG	5.43819	None	None	None	None	0	0	0	0	0	R KNEE	M	Knee	0.03	63	22.2
826	Low	NEG	4.40069	None	None	None	None	0	0	0	2	2	R KNEE	M	Knee	2.36	2023	85.8
827	High	NEG	4.39931	None	None	None	None	0	1	3	2	6	R PROSTHETIC KNEE JOINT	F	Knee	7.63	19523	90.9
828	Low	NEG	4.39444	None	None	None	None	0	0	0	0	0	L KNEE	M	Knee	0.02	203	10.3
829	High	POS	4.39375	None	Streptococcus_agalactiae	Streptococcus_agalactiae, 100%	None	1	1	3	2	6	L KNEE	F	Knee	34.32	30779	97.4
830	Low	NEG	4.39306	None	None	None	None	0	0	0	0	0	R HIP SYNOVIAL	M	Hip	0.43	791	69.1
831	Low	NEG	4.39167	None	None	None	None	0	0	0	0	0	L KNEE	F	Knee	2.41	294	54.8
832	Low	NEG	4.39028	None	None	None	None	0	0	0	0	0	L KNEE JOINT ASPIRATE	M	Knee	0.47	84	25
833	Low	NEG	4.38264	None	None	None	None	0	0	0	2	2	KNEE JOINT FL	F	Knee	0.29	2961	94.1
834	Low	NEG	5.25278	None	None	None	None	0	1	0	0	1	R HIP	M	Hip	14.32	2121	56.8
835	Low	NEG	3.24861	None	None	None	None	0	0	0	0	0	L KNEE	F	Knee	0.14	196	64.3
836	Low	NEG	5.24514	None	None	None	None	0	0	0	0	0	R KNEE	M	Knee	0.4	73	27.4
837	Low	NEG	5.24306	None	None	None	None	0	0	0	0	0	L KNEE	M	Knee	1.13	72	16.7
838	Low	NEG	3.46667	None	None	None	None	0	0	0	0	0	L KNEE JOINT	M	Knee	0.4	21	0
839	High	POS	0.465972	Methicillin	Staphylococcus_aureus_x000D_	Staphylococcus_aureus, 100%	None	1	1	3	2	6	KNEE	M	Knee	29.23	8603	95.2
840	High	POS	0.463889	None	Streptococcus_agalactiae	Streptococcus_agalactiae, 100%	None	1	1	3	0	4	L KNEE	M	Knee	40.97	10493	73
841	Low	NEG	3.46111	None	None	None	None	0	0	0	0	0	KNEE	M	Knee	0.22	104	12.5
842	Low	NEG	3.45764	None	None	None	None	0	0	0	2	2	L PROSTHETIC KNEE	F	Knee	6.45	70	100
843	Low	NEG	3.45625	None	None	None	None	0	1	0	0	1	L HIP JOINT	F	Hip	7.42	133	42.1
844	High	POS	1.45208	None	None	Veillonella_parvula, 99%	None	1	0	3	2	5	L KNEE	M	Knee	3.49	6419	82.1
845	Low	NEG	3.45069	None	None	None	None	0	0	0	0	0	R HIP	M	Hip	5.7	805	30.4
846	High	POS	1.43333	None	None	Staphylococcus_epidermidis 100%	None	1	1	3	2	6	L KNEE	M	Knee	35.24	10976	94.5
847	Low	NEG	5.42986	None	None	None	None	0	0	0	0	0	L KNEE	M	Knee	0.43	77	9.1
848	Low	NEG	5.42847	None	None	None	None	0	0	0	0	0	L HIP	M	Hip	0.04	182	30.8
849	Low	NEG	5.42569	None	None	None	None	0	0	0	0	0	R KNEE	M	Knee	2.45	196	39.3
850	High	POS	1.42431	Methicillin	Staphylococcus_aureus_x000D_	Staphylococcus_aureus, 100%	None	1	1	3	2	6	R KNEE SYNOVIAL	F	Knee	83.55	17115	84.4
851	Low	NEG	4.40556	None	None	None	None	0	0	0	0	0	R KNEE	M	Knee	2.82	217	21.7
852	Low	NEG	4.40347	None	None	None	None	0	0	0	0	0	L KNEE	F	Knee	0.1	1047	58.3
853	High	NEG	4.39861	None	None	None	None	0	1	3	2	6	R KNEE	F	Knee	28.66	8554	82
854	High	POS	1.39722	None	None	Staphylococcus_capitis, 100%	None	1	0	3	2	5	L HIP	M	Hip	0.11	33691	96.4
855	Low	NEG	4.39653	None	None	None	None	0	1	0	0	1	R KNEE	F	Knee	41.07	936	75.8
856	Low	NEG	4.39514	None	None	None	None	0	0	0	0	0	R KNEE	F	Knee	0.07	44	15.9
857	Low	NEG	3.34375	None	None	None	None	0	0	0	2	2	R KNEE	M	Knee	0.64	599	82.2
858	High	POS	3.34167	Macrolide	Streptococcus_agalactiae	Streptococcus_agalactiae, 100%	None	1	1	3	2	6	R KNEE	F	Knee	104.95	132580	80.6
859	High	POS	3.34028	Macrolide	Streptococcus_agalactiae	Streptococcus_agalactiae, 100%	None	1	1	3	2	6	L KNEE	F	Knee	58.98	127897	80.6
860	Low	POS	6.33958	None	Streptococcus_agalactiae	Streptococcus_agalactiae, 100%	None	1	0	0	0	0	L KNEE	F	Knee	2.03	23	13.1
861	Low	NEG	3.3375	None	None	None	None	0	0	0	0	0	R KNEE	M	Knee	4.33	294	50
862	Low	NEG	3.33125	None	None	None	None	0	0	0	0	0	R KNEE	M	Knee	0.1	3	33.3
863	Low	NEG	6.34306	None	None	None	None	0	0	0	0	0	R KNEE	M	Knee	0.82	42	16.7
864	Low	POS	5.34861	None	None	Exiguobacterium_undae, 100%	None	1	0	0	0	0	LEFT KNEE	F	Knee	0.04	11	9.1
865	High	POS	2.34306	None	None	Streptococcus_anginosus, 100%	None	1	1	3	2	6	LEFT KNEE	F	Knee	13.38	21539	94.1
866	High	NEG	5.33819	None	None	None	None	0	1	3	0	4	L KNEE SYNOVIAL FLUID	F	Knee	19.71	10899	75.5
867	Low	NEG	2.42361	None	None	None	None	0	0	0	0	0	L KNEE	F	Knee	0.37	9	11.1
868	High	POS	3.42222	None	None	Rhodotorula_sp, 100%	None	1	1	3	2	6	L KNEE	M	Knee	20.2	7679	85.2
869	Low	POS	5.43333	None	None	Enterobacter_cloacae, 55%; Stenotrophomonas_maltophilia, 44%	Cladosporium_halotolerans, 100%	3	0	0	0	0	L KNEE	F	Knee	0.09	103	7.8
870	Low	NEG	5.43194	None	None	None	None	0	1	0	0	1	R KNEE	M	Knee	37.83	1967	76.5
871	Low	NEG	5.43056	None	None	None	None	0	1	0	2	3	L HIP JOINT ASPIRATE	F	Hip	12.96	1589	80.7
872	High	POS	5.42847	None	None	Staphylococcus_saprophyticus, 95%	None	1	0	3	2	5	L KNEE	F	Knee	0.43	6629	91.9
873	High	NEG	5.45972	None	None	None	None	0	1	3	2	6	R KNEE	F	Knee	13.6	7980	88.2
874	High	NEG	5.45764	None	None	None	None	0	1	3	2	6	L KNEE	M	Knee	8.86	8400	96.8
875	Low	NEG	5.45417	None	None	None	None	0	0	0	0	0	R KNEE	M	Knee	0.21	23	13
876	Low	NEG	2.44444	None	None	None	None	0	0	0	0	0	R KNEE	M	Knee	0.03	25	12
877	Low	NEG	2.44306	None	None	None	None	0	0	0	0	0	L KNEE	F	Knee	4.18	351	38.7
878	High	POS	4.39444	None	None	Proteus_mirabilis, 100%	None	1	1	3	2	6	L KNEE	M	Knee	33.81	24780	95.3
879	Low	NEG	4.39236	None	None	None	None	0	0	0	0	0	R KNEE	F	Knee	0.7	81	34.5
880	Low	NEG	4.39097	None	None	None	None	0	0	0	0	0	R KNEE	F	Knee	0.17	249	5.6
881	Low	NEG	6.36736	None	None	None	None	0	0	0	0	0	R KNEE	F	Knee	0.06	79	15.1
882	High	NEG	6.36389	None	None	None	None	0	0	3	2	5	R KNEE	M	Knee	1.02	9009	95.7
883	Low	NEG	3.36181	None	None	None	None	0	0	0	0	0	L KNEE	M	Knee	0.39	9	11.2
884	Low	NEG	6.37778	None	None	None	None	0	0	0	0	0	L KNEE	F	Knee	1.83	788	55
885	Low	NEG	6.37569	None	Cutibacterium_acnes	None	None	0	0	0	0	0	R KNEE	F	Knee	0.3	76	42.1
886	Low	NEG	5.42083	None	None	None	None	0	1	0	0	1	R KNEE	M	Knee	13.35	31	12.9
887	Low	NEG	5.41806	None	None	None	None	0	0	0	0	0	R KNEE	F	Knee	2.98	1379	64.4
888	High	NEG	5.41667	None	None	None	None	0	1	3	2	6	L KNEE	M	Knee	15.14	4326	82.7
889	Low	NEG	5.41389	None	None	None	None	0	0	0	0	0	L KNEE	F	Knee	4.77	2170	60.7
890	Low	NEG	5.41181	None	None	None	None	0	0	0	0	0	R KNEE	M	Knee	0.05	42	33.3
891	Low	NEG	5.40972	None	None	None	None	0	0	0	0	0	L KNEE	M	Knee	0.02	105	20
892	Low	NEG	3.39931	None	None	None	None	0	0	0	0	0	R KNEE	F	Knee	0.11	94	23.4
893	Low	NEG	2.39097	None	None	None	None	0	1	0	2	3	R KNEE	F	Knee	8.84	2436	94.8
894	High	POS	1.37708	None	None	Staphylococcus_aureus, 99%	None	1	1	3	2	6	R KNEE	F	Knee	22.04	94017	93.9
895	Low	POS	6.31181	None	None	Cutibacterium_acnes, 100%	None	1	0	0	0	0	L KNEE	M	Knee	0.13	98	13.3
896	Low	NEG	6.31042	None	None	None	None	0	0	0	0	0	R KNEE	F	Knee	0.03	49	14.3
897	Low	NEG	2.30417	None	None	None	None	0	1	0	2	3	R HIP	M	Hip	62.77	2506	92.5
898	Low	NEG	6.45556	None	None	None	None	0	0	0	0	0	R KNEE	M	Knee	0.58	315	17.8
899	Low	NEG	4.43403	None	None	None	None	0	0	0	0	0	R KNEE SYNOVIAL FLUID	F	Knee	0.04	14	50
900	Low	NEG	4.46042	None	None	None	None	0	0	0	0	0	L KNEE	F	Knee	6.74	104	27.9
901	Low	NEG	6.45347	None	None	None	None	0	0	0	0	0	R KNEE	F	Knee	0.06	781	13.1
902	High	NEG	6.44236	None	None	None	None	0	1	3	2	6	L KNEE	M	Knee	27.85	38577	94.6
903	Low	NEG	4.41875	None	None	None	None	0	0	0	0	0	L HIP	M	Hip	0.01	1	0
904	Low	NEG	6.41389	None	None	None	None	0	0	0	0	0	L KNEE	F	Knee	0.16	21	66.7
905	Low	NEG	6.4125	None	None	None	None	0	0	0	0	0	L KNEE	F	Knee	4.14	322	30.4
906	Low	NEG	5.36111	None	None	None	None	0	0	0	0	0	R KNEE	F	Knee	0.5	63	22.2
907	Low	NEG	5.37986	None	None	None	None	0	1	0	0	1	R KNEE JOINT	M	Knee	8.57	245	25.7
908	Low	NEG	5.37639	None	None	None	None	0	0	0	0	0	L KNEE	M	Knee	0.05	366	35.8
909	Low	NEG	5.34653	None	None	None	None	0	0	0	0	0	R KNEE	M	Knee	0.12	159	8.8
910	Low	NEG	5.34792	None	None	None	None	0	0	0	0	0	R KNEE	F	Knee	5.28	784	66.1
911	Low	NEG	5.35139	None	None	None	None	0	0	0	2	2	L HIP	F	Hip	3.12	2667	88.7
912	Low	NEG	5.34306	None	None	None	None	0	0	0	0	0	L KNEE	M	Knee	1.71	119	53
913	Low	NEG	5.35347	None	None	None	None	0	0	0	0	0	R KNEE	M	Knee	0.04	123	13.9
914	Low	NEG	5.33125	None	None	None	None	0	0	0	0	0	L HIP	F	Hip	0.22	252	33.3
915	Low	NEG	2.34444	None	None	None	None	0	0	0	0	0	R HIP	M	Hip	0.01	1	0
916	High	POS	1.33472	None	Staphylococcus_aureus_x000D_	Staphylococcus_aureus, 47%; Porphyromonas_bennonis, 28%	None	2	1	3	2	6	R KNEE	M	Knee	23.35	45535	97.6
917	Low	NEG	2.34375	None	None	None	None	0	0	0	0	0	L TKA	M	Knee	0.92	154	68.2
918	Low	NEG	6.34236	None	None	None	None	0	1	0	0	1	L KNEE JOINT	M	Knee	9.31	280	55
919	Low	NEG	5.48403	None	None	None	None	0	0	0	0	0	L KNEE	M	Knee	0.48	18	38.9
920	Low	NEG	5.48264	None	None	None	None	0	0	0	0	0	L HIP ASPIRATION	F	Hip	0.47	247	54.3
921	Low	NEG	5.48125	None	None	None	None	0	0	3	0	3	R KNEE	F	Knee	0.07	21427	79.1
922	Low	NEG	5.48056	None	None	None	None	0	0	0	0	0	L KNEE SYNOVIAL FLUID	F	Knee	0.96	258	18.2
923	Low	NEG	4.38958	None	None	None	None	0	0	0	0	0	R KNEE	F	Knee	4.26	140	30
924	Low	NEG	4.38819	None	None	None	None	0	0	0	0	0	R KNEE	F	Knee	0.04	36	30.6
925	High	POS	1.38681	None	None	Staphylococcus_capitis, 99%	None	1	0	3	2	5	L HIP	M	Hip	0.22	7812	96.7
926	Low	NEG	5.37569	None	None	None	None	0	0	0	0	0	R KNEE SYNOVIAL FL	M	Knee	0.23	16	6.2
927	Low	NEG	5.37431	None	None	None	None	0	0	0	0	0	R KNEE	M	Knee	0.03	50	2
928	Low	NEG	5.36944	None	None	None	None	0	0	0	0	0	R KNEE	M	Knee	0.04	581	10.9
929	Low	NEG	5.36736	None	None	None	None	0	0	0	0	0	R KNEE	F	Knee	0.47	200	30
930	Low	NEG	5.37847	None	None	None	None	0	0	0	0	0	R HIP	F	Hip	0.68	1617	67.6
931	Low	NEG	5.36944	None	None	None	None	0	0	0	0	0	L KNEE	F	Knee	0.07	108	14.8
932	Low	NEG	5.34375	None	None	None	None	0	0	0	0	0	R KNEE	M	Knee	6.67	280	65
933	High	POS	5.33958	None	Staphylococcus_aureus_x000D_	Staphylococcus_aureus, 94%	None	1	1	3	2	6	R HIP	F	Hip	15.84	20797	96.2
934	Low	POS	5.32847	None	None	Escherichia_coli, 99%	None	1	0	0	0	0	L KNEE FLUID	F	Knee	2.18	700	12.8
935	Low	NEG	3.43194	None	None	None	None	0	0	0	0	0	R KNEE	F	Knee	1.73	8	37.5
936	Low	NEG	7.42917	None	None	None	None	0	0	0	0	0	R KNEE	F	Knee	0.09	38	18.4
937	Low	NEG	7.425	None	None	None	None	0	0	0	0	0	L KNEE	F	Knee	0.08	53	35.8
938	Low	NEG	7.42431	None	None	None	None	0	0	0	0	0	R HIP	M	Hip	0.18	4	50
939	Low	NEG	7.42153	None	None	None	None	0	0	0	0	0	R KNEE	M	Knee	0.3	70	24.3
940	Low	NEG	3.41875	None	None	None	None	0	0	0	0	0	R HIP	F	Hip	1.01	516	75.2
941	Low	NEG	2.37778	None	None	None	None	0	0	0	0	0	L KNEE FL	M	Knee	0.44	57	17.5
942	Low	NEG	2.37639	None	None	None	None	0	0	0	0	0	KNEE	F	Knee	4.47	590	56.2
943	Low	NEG	2.37083	None	None	None	None	0	0	0	0	0	L KNEE	F	Knee	0.48	1214	50.4
944	Low	NEG	5.40903	None	None	None	None	0	0	0	0	0	L HIP	F	Hip	0.06	212	17.5
945	Low	NEG	5.40694	None	None	None	None	0	0	0	0	0	R KNEE	M	Knee	0.12	28	25
946	Low	NEG	5.43472	None	None	None	None	0	0	0	0	0	L KNEE	F	Knee	0.12	77	45.4
947	Low	NEG	5.43333	None	None	None	None	0	0	0	0	0	R KNEE JOINT	M	Knee	0.59	168	25
948	High	NEG	5.42708	None	None	None	None	0	1	3	2	6	L KNEE	M	Knee	15.57	3892	93.7
949	Low	NEG	5.42569	None	None	None	None	0	0	0	0	0	L KNEE JOINT	M	Knee	0.41	229	17
950	Low	NEG	5.425	None	None	None	None	0	0	0	0	0	L KNEE	F	Knee	1.01	343	49
951	Low	POS	1.42292	None	None	Veillonella_parvula, 100%	None	1	0	0	0	0	L KNEE	M	Knee	0.05	10	40
952	High	POS	5.40556	None	None	Veillonella_parvula, 100%	None	1	1	3	2	6	L KNEE	M	Knee	25.38	50197	95.4
953	Low	POS	1.40486	Methicillin	None	Staphylococcus_aureus, 99%	None	1	0	0	0	0	SYNOVIAL FLUID L KNEE	M	Knee	3.51	1107	67.8
954	Low	NEG	5.40417	None	None	None	None	0	0	0	0	0	R KNEE	F	Knee	0.63	390	56.9
955	Low	NEG	5.40208	None	None	None	None	0	0	3	0	3	L HIP	M	Hip	0.7	3498	6.7
956	Low	POS	1.4	None	None	Staphylococcus_aureus, 99%	None	1	0	0	0	0	R KNEE	F	Knee	0.02	172	15.7
957	Low	NEG	4.425	None	None	None	None	0	0	0	2	2	L KNEE	M	Knee	0.01	10	80
958	Low	NEG	4.42014	None	None	None	None	0	0	0	0	0	L HIP	M	Hip	2.65	29	34.5
959	Low	NEG	4.42847	None	None	None	None	0	0	0	0	0	KNEE JOINT	F	Knee	0.01	940	20.2
960	High	POS	6.42639	None	None	Streptococcus_salivarius, 100%	None	1	1	3	2	6	LEFT KNEE	M	Knee	34.52	10213	97.6
961	Low	NEG	5.38472	None	None	None	None	0	0	0	0	0	RIGHT KNEE	M	Knee	0.09	206	64.1
962	Low	NEG	5.38194	None	None	None	None	0	0	0	0	0	RIGHT KNEE ASPIRATION	M	Knee	1.88	27	40.8
963	High	POS	3.375	None	None	Serratia_marcescens, 97%	None	1	1	3	2	6	R KNEE SYNOVIAL FLUID	M	Knee	10.8	13365	94.4
964	Low	NEG	5.39375	None	None	None	None	0	0	0	0	0	L KNEE	F	Knee	0.36	1008	51.4
965	Low	NEG	5.39167	None	None	None	None	0	0	0	0	0	L KNEE	F	Knee	1.82	21	33.4
966	Low	NEG	5.38611	None	None	None	None	0	0	0	0	0	L KNEE	F	Knee	0.02	29	20.7
967	Low	NEG	2.42778	None	None	None	None	0	0	0	0	0	R KNEE	F	Knee	0.04	11	9.1
968	Low	NEG	3.425	None	None	None	None	0	0	0	0	0	L KNEE	F	Knee	0.07	1576	22.9
969	Low	NEG	3.42222	None	None	None	None	0	0	0	0	0	R KNEE	F	Knee	0.46	784	22.4
970	Low	NEG	3.42083	None	None	None	None	0	0	0	0	0	R KNEE JOINT	F	Knee	0.56	28	25
971	Low	NEG	2.44653	None	None	None	None	0	0	0	0	0	L HIP JOINT	M	Hip	2.2	966	42
972	Low	NEG	3.44375	None	None	None	None	0	0	0	0	0	R KNEE	M	Knee	0.9	7	14.3
973	Low	POS	6.36875	None	None	Corynebacterium_striatum, 100%	None	1	1	0	0	1	R KNEE JOINT	F	Knee	9.41	945	63
974	Low	NEG	2.36111	None	None	None	None	0	0	0	0	0	L HIP	M	Hip	0.01	0	0
975	Low	NEG	1.3625	None	None	None	None	0	0	0	0	0	L KNEE JOINT	F	Knee	0.78	140	55
976	Low	NEG	1.35486	None	None	None	None	0	0	0	0	0	R KNEE	F	Knee	0.75	238	26.5
977	Low	NEG	5.42569	None	None	None	None	0	0	0	0	0	L KNEE	M	Knee	0.68	325	49
978	Low	NEG	5.42361	None	None	None	None	0	0	0	0	0	R KNEE	M	Knee	0.85	266	39.5
979	Low	NEG	5.42847	None	None	None	None	0	0	0	0	0	R HIP	F	Hip	0.01	5	60
980	Low	NEG	5.42569	None	None	None	None	0	0	0	0	0	L KNEE	F	Knee	0.22	18	11.1
981	Low	NEG	5.42431	None	None	None	None	0	1	0	0	1	L HIP JOINT	M	Hip	9.75	2418	73.4
982	Low	NEG	5.42222	None	None	None	None	0	0	0	0	0	R KNEE	M	Knee	0.12	78	6.4
983	Low	NEG	4.41597	None	None	None	None	0	0	0	0	0	L KNEE SYNOVIAL FLUID	M	Knee	0.07	50	16
984	Low	NEG	4.43056	None	None	None	None	0	0	0	0	0	R KNEE JOINT FLUID	M	Knee	0.69	175	64
985	Low	NEG	4.41458	None	None	None	None	0	0	0	0	0	R KNEE	M	Knee	1.73	165	33.9
986	Low	NEG	4.4125	None	None	None	None	0	0	0	0	0	R KNEE	M	Knee	3.94	50	54
987	Low	NEG	4.40764	None	None	None	None	0	0	0	0	0	L KNEE	M	Knee	0.66	11	27.3
988	Low	NEG	4.40139	None	None	None	None	0	0	0	0	0	R HIP JOINT FL	F	Hip	0.36	320	19.1
989	Low	NEG	4.39792	None	None	None	None	0	1	0	2	3	R KNEE	F	Knee	7.92	56	87.5
990	Low	NEG	6.39514	None	None	None	None	0	0	0	0	0	L KNEE JOINT FLUID	M	Knee	3.74	12	25
991	High	POS	6.38125	None	None	Staphylococcus_epidermidis 100%	None	1	1	3	2	6	L KNEE ASPIRATE	M	Knee	14.3	10507	95.7
992	Low	NEG	4.37292	None	None	None	None	0	1	0	0	1	L KNEE	M	Knee	15.96	347	77.5
993	Low	NEG	5.42986	None	None	None	None	0	0	0	0	0	R HIP	F	Hip	5	2121	20.8
994	Low	NEG	5.42708	None	None	None	None	0	1	0	0	1	R KNEE	F	Knee	86.64	175	36
995	Low	NEG	5.42222	None	None	None	None	0	1	0	0	1	L HIP	F	Hip	19.1	966	69.5
996	Low	NEG	5.42083	None	None	None	None	0	0	0	0	0	L KNEE SYNOVIAL FLUID	M	Knee	1.84	105	6.6
997	High	POS	2.38472	Methicillin	None	Staphylococcus_lugdunensis, 99%	None	1	1	3	2	6	LEFT KNEE	F	Knee	37.05	13356	92.5
998	Low	NEG	2.38264	None	None	None	None	0	0	0	0	0	R KNEE JOINT	F	Knee	0.04	710	22.1
999	Low	NEG	2.37639	None	None	None	None	0	0	0	0	0	L KNEE	F	Knee	0.36	490	14.3
1000	Low	NEG	2.36458	None	None	None	None	0	0	0	0	0	RIGHT HIP	F	Hip	4.31	189	55.6
1001	Low	NEG	2.3625	None	None	None	None	0	0	0	0	0	L KNEE	F	Knee	0.63	25	4
1002	High	POS	3.36042	None	None	Staphylococcus_aureus, 100%	None	1	1	3	2	6	LEFT KNEE	M	Knee	60.09	35000	94.2
1003	Low	NEG	2.32847	None	None	None	None	0	0	0	0	0	L KNEE	M	Knee	3.81	2149	56
1004	Low	NEG	2.32639	None	None	None	None	0	0	0	0	0	R KNEE	F	Knee	0.01	90	14.4
1005	Low	NEG	5.32292	None	None	None	None	0	0	0	0	0	L HIP	M	Hip	0.17	83	7.2
1006	Low	NEG	5.32153	None	None	None	None	0	0	0	0	0	R KNEE	F	Knee	0.21	67	13.4
1007	Low	NEG	2.31736	None	None	None	None	0	0	0	0	0	L HIP JOINT FLUID	F	Hip	1.3	175	44
1008	High	POS	5.31667	None	None	Staphylococcus_aureus, 98%	None	1	1	3	2	6	R HIP	M	Hip	13.62	12467	93.6
1009	Low	NEG	5.33403	None	None	None	None	0	0	0	0	0	R KNEE	F	Knee	0.03	46	2.2
1010	Low	NEG	4.47431	None	None	None	None	0	0	0	0	0	L KNEE	M	Knee	0.53	161	60.9
1011	High	POS	1.47292	None	None	Staphylococcus_lugdunensis, 100%	None	1	1	3	2	6	R KNEE	M	Knee	13.67	20545	92
1012	High	POS	4.46528	None	None	Streptococcus_vestibularis, 98%	None	1	1	3	2	6	R KNEE	M	Knee	24.41	4032	93.3
1013	Low	POS	4.44653	None	None	Corynebacterium_sp, 100%	None	1	0	0	0	0	R KNEE	M	Knee	0.47	448	67.2
1014	Low	NEG	4.44514	None	None	None	None	0	0	0	0	0	L KNEE	F	Knee	0.74	273	15.4
1015	Low	NEG	6.42361	None	None	None	None	0	0	0	0	0	LT KNEE JT	F	Knee	0.44	56	21.5
1016	High	POS	3.42222	None	None	Streptococcus_sp, 92%	None	1	1	3	2	6	RT HIP FLUID	M	Hip	29.22	14182	92.1
1017	Low	NEG	6.42014	None	None	None	None	0	0	0	0	0	L KNEE	M	Knee	0.71	28	25
1018	Low	NEG	3.41667	None	None	None	None	0	0	0	0	0	L KNEE	M	Knee	0.52	162	10.5
1019	Low	NEG	6.41667	None	None	None	None	0	0	0	0	0	L KNEE	M	Knee	1.02	112	56.2
1020	Low	NEG	6.41181	None	None	None	None	0	0	0	0	0	L KNEE	F	Knee	2.62	61	16.4
1021	High	POS	3.41042	None	None	Staphylococcus_epidermidis 100%	None	1	0	3	2	5	R KNEE	M	Knee	2.03	9569	98.6
1022	Low	POS	6.40972	None	None	Cutibacterium_acnes, 47%; Anaerococcus_obesiensis, 37%	None	2	0	0	0	0	R KNEE	M	Knee	0.42	44	4.6
1023	Low	NEG	6.40833	None	None	None	None	0	0	0	0	0	L HIP	F	Hip	0.01	63	38.1
1024	Low	POS	3.40486	None	None	None	Penicillium_sp, 99%	1	0	0	0	0	R KNEE	M	Knee	0.01	3	33.3
1025	High	POS	6.42708	None	None	Staphylococcus_capitis, 93%	None	1	0	3	2	5	R KNEE	M	Knee	2.15	27846	95.7
1026	Low	NEG	6.42361	None	None	None	None	0	1	0	0	1	R KNEE	F	Knee	13.88	588	38.1
1027	Low	NEG	6.41944	None	None	None	None	0	0	0	0	0	L KNEE JOINT	F	Knee	0.64	576	73.8
1028	Low	NEG	6.41597	None	None	None	None	0	0	0	0	0	L KNEE	F	Knee	0.18	336	43.7
1029	Low	NEG	5.53819	None	None	None	None	0	0	0	0	0	R KNEE	M	Knee	0.36	3	0
1030	Low	NEG	5.53611	None	None	None	None	0	0	0	0	0	L KNEE	F	Knee	1.09	147	76.2
1031	Low	NEG	5.53542	None	None	None	None	0	0	3	0	3	R HIP	M	Hip	4.01	30835	3.9
1032	Low	NEG	5.53403	None	None	None	None	0	0	0	0	0	L KNEE	M	Knee	0.03	98	14.3
1033	High	NEG	5.53333	None	None	None	None	0	1	3	2	6	L KNEE	M	Knee	23.9	19516	95.2
1034	Low	NEG	5.53194	None	None	None	None	0	0	3	0	3	L KNEE	F	Knee	1.19	3801	68.5
1035	Low	NEG	2.45486	None	None	None	None	0	0	0	0	0	R KNEE	F	Knee	0.17	175	24
1036	High	NEG	3.44931	None	None	None	None	0	0	3	2	5	L KNEE	F	Knee	0.67	3605	94.9
1037	Low	POS	2.475	None	None	None	Candida_parapsilosis, 100%	1	0	0	0	0	L KNEE FLUID	M	Knee	0.07	616	48.9
1038	Low	NEG	2.46458	None	None	None	None	0	0	0	2	2	R KNEE	F	Knee	0.01	21	90.5
1039	Low	NEG	2.45625	None	None	None	None	0	1	0	0	1	R KNEE	M	Knee	10.27	168	50
1040	Low	NEG	5.45278	None	None	None	None	0	0	0	0	0	LEFT HIP SYNOVIAL FLUID	M	Hip	0.42	1372	43.3
1041	Low	POS	1.47014	Aminoglycoside	Staphylococcus_aureus_x000D_	Staphylococcus_aureus, 100%	None	1	0	0	0	0	RIGHT KNEE	M	Knee	1.77	42	33.4
1042	Low	NEG	3.43472	None	None	None	None	0	0	0	0	0	R KNEE	M	Knee	2.8	26	15.4
1043	Low	NEG	6.42778	None	None	None	None	0	0	0	0	0	L KNEE	F	Knee	1.11	20	25
1044	Low	POS	2.41111	None	None	Granulicatella_adiacens, 96%	None	1	1	0	0	1	L DISTAL FEMUR	F	Knee	20.56	2814	62.7
1045	High	POS	2.40694	Aminoglycoside	None	Staphylococcus_epidermidis 94%	None	1	1	3	2	6	L KNEE	M	Knee	98.63	4977	91.2
1046	Low	NEG	5.40278	None	None	None	None	0	0	0	0	0	R KNEE	F	Knee	0.5	39	25.7
1047	Low	NEG	5.41667	None	None	None	None	0	0	0	0	0	R KNEE	F	Knee	0.03	55	12.8
1048	Low	NEG	3.44306	None	None	None	None	0	0	0	0	0	L HIP	M	Hip	0.02	1029	29.3
1049	Low	NEG	2.44028	None	None	None	None	0	0	0	0	0	R KNEE	M	Knee	1.13	16	24.9
1050	Low	NEG	3.4375	None	None	None	None	0	0	0	0	0	R KNEE	F	Knee	0.04	4	25
1051	Low	NEG	3.42917	None	None	None	None	0	0	0	2	2	L KNEE	F	Knee	1.69	2627	93.9
1052	Low	NEG	2.42778	None	None	None	None	0	0	0	0	0	R KNEE	M	Knee	2.4	439	22.5
1053	Low	NEG	3.44653	None	None	None	None	0	0	0	0	0	L KNEE	M	Knee	0.01	245	20
1054	Low	POS	2.50208	None	None	Staphylococcus_hominis, 100%	None	1	0	0	0	0	R KNEE JOINT	F	Knee	0.03	83	7.3
1055	Low	NEG	5.5	None	None	None	None	0	0	0	0	0	R KNEE	F	Knee	0.13	399	21.1
1056	Low	NEG	2.49792	None	None	None	None	0	0	0	0	0	R KNEE	M	Knee	0.4	84	16.7
1057	Low	NEG	2.49653	None	None	None	None	0	0	0	0	0	R KNEE	F	Knee	0.08	49	14.3
1058	Low	NEG	2.49306	None	None	None	None	0	0	0	2	2	R HIP	M	Hip	3.15	693	83.8
1059	Low	POS	2.43611	None	None	Cutibacterium_acnes, 74%	None	1	0	0	0	0	R HIP	M	Hip	0.01	2	50
1060	Low	NEG	2.43472	None	None	None	None	0	0	0	0	0	L HIP	M	Hip	0.01	1	0.1
1061	High	NEG	4.4625	None	None	None	None	0	1	3	2	6	L KNEE	F	Knee	7.57	24297	95.8
1062	High	POS	4.45556	None	None	Staphylococcus_aureus, 56%; Leuconostoc_mesenteroides, 23%; Cutibacterium_acnes, 18%	None	3	1	3	2	6	L KNEE	M	Knee	82.74	94465	91.1
1063	High	POS	1.44444	None	None	Staphylococcus_epidermidis 100%	None	1	1	3	2	6	L HIP	F	Hip	21.08	34202	97
1064	Low	NEG	4.44236	None	None	None	None	0	0	0	0	0	L KNEE	M	Knee	0.05	30	3.3
1065	High	POS	3.43264	None	None	Staphylococcus_epidermidis 100%	None	1	1	3	2	6	L KNEE	F	Knee	11.81	46151	97.4
1066	Low	NEG	3.42847	None	None	None	None	0	0	0	0	0	R HIP	M	Hip	0.02	343	26.5
1067	Low	NEG	3.42708	None	None	None	None	0	0	0	0	0	R KNEE	M	Knee	0.17	6	16.7
1068	Low	NEG	3.44931	None	None	None	None	0	0	0	0	0	R KNEE FLUID	F	Knee	0.06	95	50.5
1069	Low	NEG	6.36667	None	None	None	None	0	0	0	0	0	R KNEE	M	Knee	0.18	56	55.4
1070	High	NEG	6.36111	None	None	None	None	0	1	3	2	6	R KNEE FLUID	M	Knee	17.32	3192	95.1
1071	Low	NEG	6.35764	None	None	None	None	0	1	0	0	1	R KNEE	F	Knee	8.25	161	43.5
1072	High	POS	2.35278	Beta-lactam	None	Escherichia_coli, 100%	None	1	1	3	0	4	R KNEE	F	Knee	41.1	130180	70.3
1073	Low	NEG	6.34792	None	None	None	None	0	0	0	0	0	L HIP	F	Hip	0.52	238	67.6
1074	Low	NEG	6.34653	None	None	None	None	0	0	0	0	0	R KNEE	F	Knee	1.03	50	6
1075	Low	NEG	3.43819	None	None	None	None	0	0	0	0	0	R KNEE	M	Knee	0.54	6	16.6
1076	Low	NEG	3.45208	None	None	None	None	0	0	0	0	0	R KNEE	F	Knee	0.06	418	53.3
1077	Low	NEG	3.44792	None	None	None	None	0	0	0	0	0	R KNEE	M	Knee	0.07	108	13
1078	Low	NEG	3.44514	None	None	None	None	0	0	0	2	2	R HIP	M	Hip	0.01	1	100
1079	High	POS	3.44236	None	None	Enterococcus_faecalis, 73%	None	1	1	3	2	6	R KNEE SYNOVIUM	M	Knee	32.19	9947	94.5
1080	High	POS	2.47361	None	Staphylococcus_aureus_x000D_	Staphylococcus_aureus, 99%	None	1	1	3	2	6	L TKA	M	Knee	47.6	74732	85.2
1081	Low	NEG	2.45556	None	None	None	None	0	0	0	0	0	R KNEE	F	Knee	0.02	490	58.6
1082	High	POS	2.45417	None	None	Klebsiella_aerogenes, 97%	None	1	1	3	2	6	L HIP	M	Hip	69.62	26495	92.8
1083	High	POS	2.44861	None	None	Staphylococcus_epidermidis 96%	None	1	1	3	2	6	L KNEE FLUID	M	Knee	23.14	39179	97.4
1084	Low	POS	6.44375	None	None	Staphylococcus_aureus, 78%	None	1	0	0	0	0	R KNEE	M	Knee	0.21	532	67.1
1085	High	POS	5.4375	None	None	Cutibacterium_acnes, 95%	None	1	1	3	2	6	L TKA/L KNEE	M	Knee	10.83	11298	85.4
1086	Low	NEG	5.41181	None	None	None	None	0	0	0	0	0	SUNOVIAL L KNEE	M	Knee	0.04	721	45.6
1087	Low	NEG	5.44792	None	None	None	None	0	0	0	0	0	R KNEE	M	Knee	3.53	49	28.6
1088	High	POS	5.44444	None	None	Staphylococcus_capitis, 90%	None	1	1	3	2	6	L KNEE	F	Knee	15.3	33705	98.1
1089	Low	NEG	5.43681	None	None	None	None	0	0	0	0	0	R KNEE	M	Knee	0.29	38	21
1090	Low	NEG	5.42361	None	None	None	None	0	0	0	0	0	L KNEE	F	Knee	0.44	2751	62.3
1091	Low	NEG	5.42083	None	None	None	None	0	0	0	0	0	R KNEE	F	Knee	2.78	44	9.1
1092	Low	NEG	5.44028	None	None	None	None	0	0	0	0	0	R HIP	M	Hip	0.15	357	15.7
1093	Low	NEG	6.36319	None	None	None	None	0	0	0	0	0	R KNEE	F	Knee	0.03	41	24.3
1094	Low	NEG	6.35903	None	None	None	None	0	0	0	0	0	RT KNEE FLUID	F	Knee	0.65	287	65.8
1095	Low	NEG	6.35694	None	None	None	None	0	0	0	0	0	RT KNEE	M	Knee	5.48	462	66.7
1096	Low	NEG	6.35486	None	None	None	None	0	0	0	0	0	L KNEE FLUID	F	Knee	0.39	52	7.7
1097	High	POS	2.49236	None	None	Lysinibacillus_massiliensis, 53%; Bacilius_novalis, 33%; Corynebacterium_marinum, 7%	None	3	1	3	2	6	R KNEE	M	Knee	25.8	5894	93
1098	Low	NEG	5.48889	None	None	None	None	0	0	0	0	0	R HIP	F	Hip	1.02	184	17.4
1099	Low	NEG	5.48681	None	None	None	None	0	0	0	0	0	L KNEE	M	Knee	0.85	63	11.1
1100	Low	NEG	5.45694	None	None	None	None	0	0	0	0	0	L KNEE	F	Knee	1.3	51	21.5
1101	Low	NEG	5.44931	None	None	None	None	0	0	0	0	0	L KNEE	M	Knee	6.57	109	20.2
1102	Low	NEG	5.45139	None	None	None	None	0	0	0	0	0	L KNEE	M	Knee	1.66	553	69.6
1103	Low	NEG	5.44028	None	None	None	None	0	0	0	0	0	R KNEE	F	Knee	0.84	77	18.1
1104	Low	NEG	5.43819	None	None	None	None	0	0	0	0	0	L KNEE	F	Knee	0.36	637	30.8
1105	Low	NEG	5.42847	None	None	None	None	0	1	0	0	1	R KNEE	M	Knee	15.63	217	12.9
1106	Low	NEG	2.47986	None	None	None	None	0	1	0	0	1	R KNEE	M	Knee	30.05	76	18.4
1107	Low	POS	1.475	None	None	Staphylococcus_aureus, 50%; Corynebacterium_striatum, 49%	None	2	0	0	0	0	R KNEE	M	Knee	0.7	266	15.4
1108	Low	NEG	3.47361	None	None	None	None	0	1	0	0	1	L KNEE	M	Knee	14.74	86	30.2
1109	Low	NEG	3.47292	None	None	None	None	0	0	0	0	0	L KNEE	F	Knee	3.28	958	61.9
1110	High	NEG	2.49097	None	None	None	None	0	1	3	2	6	R KNEE	M	Knee	15.61	12047	89.7
1111	High	NEG	5.48472	None	None	None	None	0	0	3	2	5	L HIP ASPIRATE	M	Hip	2.27	5677	94.3
1112	High	POS	1.48333	None	None	Enterococcus_faecalis, 92%	None	1	1	3	2	6	R KNEE	F	Knee	42.94	8596	94.1
1113	High	POS	1.48194	Aminoglycoside	None	Staphylococcus_pseudintermedius, 97%	None	1	0	3	2	5	L KNEE	M	Knee	5.72	11655	94
1114	High	POS	5.45486	None	None	Serratia_marcescens, 99%	None	1	0	3	2	5	L KNEE	M	Knee	6.14	16156	88.8
1115	High	POS	4.46875	None	None	Streptococcus_mutans, 92%	None	1	0	3	2	5	R KNEE	F	Knee	4.22	11305	89.3
1116	Low	NEG	4.46667	None	None	None	None	0	0	0	0	0	R KNEE	F	Knee	1.55	392	67.9
1117	Low	NEG	4.46458	None	None	None	None	0	0	0	0	0	R KNEE	M	Knee	2.91	36	13.9
1118	High	POS	4.47569	Methicillin, Aminoglycoside	None	Staphylococcus_epidermidis 98%	None	1	0	3	2	5	R KNEE	M	Knee	4.34	18592	91.9
1119	High	NEG	4.46389	None	None	None	None	0	1	3	2	6	L KNEE	F	Knee	12.85	3871	94
1120	Low	NEG	4.46181	None	None	None	None	0	0	0	0	0	R KNEE SYNOVIAL	F	Knee	4.09	2335	37.2
1121	Low	NEG	4.46042	None	None	None	None	0	1	0	2	3	L HIP SOFT TISSUE/JOINT FL	F	Hip	13.48	1236	93.3
1122	High	NEG	4.45833	None	None	None	None	0	1	3	2	6	R KNEE	F	Knee	18.02	10542	95.4
1123	Low	NEG	4.44583	None	None	None	None	0	0	0	0	0	L HIP	M	Hip	1.34	710	59.4
1124	High	POS	4.46597	None	None	Streptococcus_agalactiae, 93%	None	1	1	3	2	6	LEFT HIP ASPIRATE	F	Hip	12.3	7497	95
1125	Low	NEG	3.50278	None	None	None	None	0	0	0	0	0	L KNEE	F	Knee	1.32	1820	70.7
1126	Low	NEG	6.49931	None	None	None	None	0	0	0	0	0	L KNEE	F	Knee	0.01	79	15.1
1127	Low	NEG	3.49792	None	None	None	None	0	0	0	0	0	R KNEE	M	Knee	0.3	90	51.1
1128	Low	NEG	3.49653	None	None	None	None	0	0	0	0	0	L KNEE	F	Knee	0.74	220	6.8
1129	Low	NEG	5.50694	None	None	None	None	0	0	0	0	0	LT KNEE	M	Knee	1.41	95	13.7
1130	Low	NEG	5.50556	None	None	None	None	0	0	0	0	0	LT KNEE	F	Knee	0.02	45	26.7
1131	Low	NEG	5.43889	None	None	None	None	0	0	0	0	0	R KNEE	M	Knee	4.11	233	57.1
1132	Low	NEG	7.43472	None	None	None	None	0	0	0	0	0	L KNEE	M	Knee	0.02	111	14.4
1133	Low	NEG	2.47431	None	None	None	None	0	0	0	0	0	L KNEE	M	Knee	0.96	69	27.5
1134	Low	NEG	3.45347	None	None	None	None	0	0	0	0	0	R HIP JOINT FL	M	Hip	0.04	397	15.6
1135	Low	NEG	6.45208	None	None	None	None	0	0	0	0	0	R KNEE	F	Knee	0.33	544	43
1136	Low	NEG	6.45	None	None	None	None	0	0	0	0	0	R KNEE	M	Knee	1.7	81	50.6
1137	Low	NEG	6.47153	None	None	None	None	0	0	0	0	0	L HIP ASPIRATE	M	Hip	1.66	49	14.3
1138	Low	NEG	6.46944	None	None	None	None	0	0	0	2	2	L KNEE	M	Knee	2.6	648	80.8
1139	Low	NEG	6.46736	None	None	None	None	0	1	0	0	1	L KNEE	M	Knee	12.63	37	21.6
1140	High	POS	5.46528	None	None	Staphylococcus_aureus, 97%	None	1	1	3	2	6	L KNEE	M	Knee	67.75	27209	92.6
1141	Low	NEG	5.41528	None	None	None	None	0	0	0	0	0	L KNEE	F	Knee	2.12	1743	16.9
1142	Low	NEG	5.41736	None	None	None	None	0	1	0	0	1	KNEE ASPIRATE	M	Knee	9.81	1008	68.1
1143	Low	NEG	5.39931	None	None	None	None	0	0	0	0	0	L KNEE	F	Knee	0.04	429	42
1144	Low	NEG	5.39722	None	None	None	None	0	0	0	0	0	R KNEE	M	Knee	0.03	595	67
1145	Low	NEG	5.38958	None	None	None	None	0	0	0	0	0	L KNEE	M	Knee	0.01	728	11.5
1146	Low	NEG	5.3875	None	None	None	None	0	0	0	0	0	R HIP JOINT	F	Hip	0.04	56	12.5
1147	High	NEG	5.38472	None	None	None	None	0	1	3	2	6	R KNEE	F	Knee	31.15	3227	92.4
1148	Low	NEG	5.38333	None	None	None	None	0	0	0	0	0	L KNEE	M	Knee	0.01	84	10.7
1149	Low	NEG	5.425	None	None	None	None	0	0	0	0	0	R KNEE	F	Knee	0.01	192	10.9
1150	Low	NEG	5.41597	None	None	None	None	0	0	0	0	0	R KNEE	F	Knee	0.05	141	13.4
1151	Low	NEG	6.43889	None	None	None	None	0	0	0	0	0	R KNEE	M	Knee	1.04	6	66.7
1152	Low	NEG	6.43264	None	None	None	None	0	0	0	0	0	L KNEE	F	Knee	0.03	108	30.6
1153	High	POS	4.45069	None	None	Staphylococcus_epidermidis 49%; Cutibacterium_acnes, 39%	None	2	1	3	2	6	L KNEE	M	Knee	60.39	3416	93.9
1154	High	POS	4.44653	None	None	Staphylococcus_aureus, 97%	None	1	1	3	2	6	L KNEE	F	Knee	34.31	59794	97.5
1155	Low	NEG	6.44167	None	None	None	None	0	0	0	0	0	R KNEE	F	Knee	0.01	7	42.8
1156	Low	NEG	6.43889	None	None	None	None	0	0	0	0	0	L KNEE	F	Knee	4.47	91	15.4
1157	High	NEG	6.43542	None	None	None	None	0	1	3	2	6	KNEE SYNOVIAL	F	Knee	20.47	3080	83.4
1158	Low	NEG	6.43403	None	None	None	None	0	0	0	0	0	R KNEE	M	Knee	0.17	1680	8.3
1159	High	NEG	6.43125	None	None	None	None	0	1	3	2	6	R KNEE	M	Knee	13.69	33278	83.7
1160	Low	NEG	5.45486	None	None	None	None	0	0	0	0	0	L KNEE	F	Knee	0.29	29	20.7
1161	Low	NEG	5.45417	None	None	None	None	0	0	0	0	0	R KNEE	F	Knee	0.36	140	70
1162	Low	POS	1.44	None	Staphylococcus_aureus_x000D_	Staphylococcus_aureus, 98%	None	1	0	3	0	3	R HIP	F	Hip	0.04	41496	0.9
1163	High	NEG	6.45	None	None	None	None	0	1	3	2	6	R KNEE	M	Knee	23.39	45815	93.1
1164	Low	POS	4.45	None	None	Staphylococcus_epidermidis 98%	None	1	0	0	0	0	R KNEE	F	Knee	0.01	1176	5.4
1165	Low	NEG	5.44	None	None	None	None	0	0	0	0	0	R HIP	M	Hip	0.01	1	0.1
1166	Low	NEG	6.44	None	None	None	None	0	0	3	0	3	L HIP	F	Hip	0.01	3192	26.9
1167	Low	NEG	6.44	None	None	None	None	0	0	0	0	0	L KNEE	M	Knee	0.03	21	33.4
1168	Low	NEG	6.44	None	None	None	None	0	0	0	0	0	L KNEE	M	Knee	2.27	77	27.2
1169	Low	NEG	6.42	None	None	None	None	0	0	0	0	0	R KNEE	M	Knee	0.55	371	56.6
1170	Low	NEG	6.42	None	None	None	None	0	0	0	0	0	R KNEE	M	Knee	0.06	41	26.8
1171	Low	NEG	6.45	None	None	None	None	0	0	0	0	0	R KNEE	F	Knee	0.03	31	9.6
1172	Low	NEG	5.47	None	None	None	None	0	0	0	0	0	L KNEE JOINT	F	Knee	0.16	124	7.3
1173	Low	NEG	5.47	None	None	None	None	0	0	0	0	0	L KNEE	F	Knee	0.01	18	22.2
1174	High	NEG	5.46	None	None	None	None	0	1	3	2	6	R KNEE	F	Knee	65.28	55475	95.8
1175	Low	NEG	2.45	None	None	None	None	0	0	0	0	0	L KNEE	M	Knee	3.84	161	34.8
1176	Low	NEG	2.45	None	None	None	None	0	0	0	0	0	R KNEE	F	Knee	0.16	161	30.5
1177	Low	NEG	2.45	None	None	None	None	0	0	0	0	0	L KNEE	M	Knee	0.02	350	42
1178	Low	NEG	2.45	None	None	None	None	0	0	0	0	0	R KNEE	F	Knee	1.8	112	18.7
1179	Low	NEG	4.46	None	None	None	None	0	0	0	0	0	R KNEE	F	Knee	0.83	84	25
1180	Low	POS	4.45	None	None	Staphylococcus_lugdunensis, 99%	None	1	0	0	0	0	R KNEE	F	Knee	0.83	161	4.3
1181	Low	POS	6.45	None	None	Staphylococcus_epidermidis 72%	None	1	1	0	0	1	R HIP	M	Hip	8.27	7	28.6
1182	Low	NEG	3.45	None	None	None	None	0	0	0	0	0	R KNEE	F	Knee	0.04	81	16.1
1183	Low	NEG	3.46	None	None	None	None	0	1	0	0	1	RT KNEE	M	Knee	6.92	2996	71.5
1184	Low	NEG	3.45	None	None	None	None	0	0	0	0	0	R KNEE JOINT FLUID	M	Knee	0.3	154	15.6
1185	High	NEG	3.44	None	None	None	None	0	1	3	2	6	L HIP	F	Hip	10.72	8246	92.3
1186	Low	NEG	3.44	None	None	None	None	0	0	3	0	3	L KNEE	F	Knee	1.52	3290	54.2
1187	Low	NEG	5.44	None	None	None	None	0	0	0	0	0	R KNEE	M	Knee	0.12	13	53.8
1188	Low	POS	2.43	None	None	Staphylococcus_epidermidis 93%	None	1	0	0	0	0	L KNEE ASPIRATION	M	Knee	0.2	147	71.4
1189	Low	NEG	5.43	None	None	None	None	0	0	0	0	0	L KNEE	M	Knee	0.02	168	45.8
1190	Low	NEG	5.43	None	None	None	None	0	0	0	0	0	L KNEE JOINT	M	Knee	0.09	1973	71
1191	High	NEG	2.46	None	None	None	None	0	1	3	2	6	L HIP ASPIRATE	M	Hip	86.51	7805	90.7
1192	Low	NEG	3.46	None	None	None	None	0	0	0	0	0	R KNEE	F	Knee	0.13	52	46.2
1193	Low	NEG	2.46	None	None	None	None	0	0	0	0	0	L HIP	M	Hip	2.06	80	38.7
1194	Low	NEG	2.45	None	None	None	None	0	0	0	0	0	R HIP	M	Hip	0.04	41	70.7
1195	Low	POS	3.46	Aminoglycoside	None	Staphylococcus_epidermidis 99%	None	1	0	0	0	0	RIGHT KNEE ASPIRATION	M	Knee	0.12	14	35.7
1196	High	NEG	5.43	None	None	None	None	0	1	3	2	6	L KNEE	M	Knee	10.48	17906	92.7
1197	Low	NEG	4.45	None	None	None	None	0	0	0	0	0	R KNEE	F	Knee	0.19	30	26.7
1198	Low	NEG	4.44	None	None	None	None	0	0	0	0	0	R KNEE FLUID	F	Knee	0.03	78	46.1
1199	High	NEG	4.43	None	None	None	None	0	1	3	2	6	R KNEE	M	Knee	106.96	59290	97.7
1200	Low	NEG	5.43	None	None	None	None	0	1	0	2	3	R HIP JOINT ASPIRATE	M	Hip	9.21	1820	85.8
1201	Low	NEG	4.45	None	None	None	None	0	0	0	0	0	L HIP	F	Hip	0.05	1141	29.5
1202	High	POS	4.43	None	None	Staphylococcus_lugdunensis, 99%	None	1	1	3	2	6	R KNEE	M	Knee	24.69	13783	95.3
1203	High	POS	4.42	None	None	Staphylococcus_epidermidis 98%	None	1	1	3	2	6	R KNEE	M	Knee	7.38	5306	97.7
1204	High	NEG	4.42	None	None	None	None	0	1	3	2	6	R KNEE	M	Knee	31.84	7987	84.4
1205	High	NEG	3.41	None	None	None	None	0	1	3	0	4	L HIP	M	Hip	11.46	3444	17.5
1206	Low	NEG	2.48	None	None	None	None	0	0	0	2	2	R HIP	F	Hip	1.74	30	83.4
1207	High	POS	1.48	Methicillin, Aminoglycoside	Staphylococcus_aureus, Pseudomonas_aeruginosa	Staphylococcus_aureus, 86%; Pseudomonas_aeruginosa, 13%	None	2	1	3	2	6	L KNEE	M	Knee	15.89	12800	93.4
1208	High	NEG	2.48	None	None	None	None	0	1	3	2	6	L KNEE	M	Knee	30.89	18326	93.2
1209	Low	NEG	2.48	None	None	None	None	0	0	0	0	0	LEFT KNEE	M	Knee	0.53	32	6.2
1210	Low	NEG	3.47	None	None	None	None	0	0	0	0	0	LEFT KNEE	F	Knee	3.98	122	8.2
1211	Low	NEG	3.47	None	None	None	None	0	0	0	0	0	LEFT KNEE	F	Knee	1.01	133	21.1
1212	Low	POS	1.47	None	None	Proteus_mirabilis, 99%	None	1	0	0	0	0	RIGHT KNEE	F	Knee	2.21	53	30.2
1213	Low	NEG	2.39	None	None	None	None	0	0	0	2	2	L KNEE	M	Knee	0.39	182	80.8
1214	Low	POS	1.42	None	None	None	Candida_glabrata, 100%	1	0	0	0	0	R KNEE	M	Knee	0.04	166	21.6
1215	High	NEG	5.42	None	None	None	None	0	1	3	2	6	R KNEE	M	Knee	55.59	9681	92.6
1216	Low	NEG	2.38	None	None	None	None	0	0	0	2	2	R HIP	F	Hip	0.15	653	94.3
1217	High	NEG	5.42	None	None	None	None	0	1	3	2	6	R KNEE	F	Knee	17.11	27279	96.3
1218	Low	NEG	5.42	None	None	None	None	0	0	0	0	0	R KNEE JOINT	M	Knee	0.02	273	7.7
1219	High	NEG	5.42	None	None	None	None	0	1	3	2	6	L KNEE	F	Knee	30.12	26292	94.1
1220	Low	NEG	5.42	None	None	None	None	0	0	0	0	0	R KNEE	M	Knee	0.7	236	45.7
1221	Low	NEG	5.42	None	None	None	None	0	1	0	0	1	L KNEE	M	Knee	10.34	197	51.3
1222	Low	NEG	2.37	None	None	None	None	0	0	0	0	0	L KNEE	M	Knee	6.3	837	39.6
1223	Low	NEG	2.37	None	None	None	None	0	0	0	0	0	R KNEE SYNOVIAL FLUID	F	Knee	0.09	69	21.7
1224	Low	NEG	7.39	None	None	None	None	0	0	0	0	0	R KNEE	M	Knee	0.3	175	16
1225	Low	POS	4.48	None	None	Staphylococcus_lugdunensis, 95%	None	1	0	0	0	0	L KNEE	F	Knee	1.71	20	5
1226	Low	NEG	4.48	None	None	None	None	0	0	0	0	0	R KNEE	M	Knee	1.14	27	14.8
1227	Low	NEG	4.48	None	None	None	None	0	1	0	0	1	L KNEE SYNOVIAL FLUID	M	Knee	17.44	1071	69.2
1228	Low	POS	3.39	None	None	Staphylococcus_epidermidis 98%	None	1	0	3	0	3	L KNEE	F	Knee	1.77	4522	58.6
1229	High	NEG	7.38	None	None	None	None	0	1	3	2	6	R HIP	M	Hip	21.68	127589	95.9
1230	Low	NEG	7.38	None	None	None	None	0	0	0	0	0	L TOTAL KNEE	F	Knee	0.01	84	8.4
1231	Low	NEG	3.45	None	None	None	None	0	0	0	0	0	R KNEE	M	Knee	0.18	105	26.7
1232	Low	POS	4.47	None	None	Enterococcus_faecalis, 94%	None	1	0	0	0	0	L HIP WOUND	F	Hip	0.08	193	71
1233	High	NEG	3.44	None	None	None	None	0	1	3	0	4	R HIP	M	Hip	91.7	42952	72.8
1234	Low	NEG	3.44	None	None	None	None	0	1	0	0	1	R HIP	F	Hip	21.86	196	37.3
1235	Low	NEG	3.44	None	None	None	None	0	0	0	0	0	L KNEE	M	Knee	0.95	38	23.6
1236	Low	POS	1.48	Beta-lactam, Bactrim	None	Proteus_mirabilis, 100%	None	1	0	0	0	0	R KNEE	M	Knee	0.13	37	8.1
1237	Low	NEG	4.47	None	None	None	None	0	0	0	0	0	L KNEE	F	Knee	1.91	445	70.6
1238	Low	POS	4.47	None	None	Staphylococcus_aureus, 25%; Sphingomonas_leidyi, 17%; Cutibacterium_acnes, 17%; Stenotrophomonas_maltophilia, 10%; Sphingomonas_jaspsi, 9%; Belnapia_moabensis, 8%; Erythrobacter_gaetbuli, 5%; Rickettsia_endosymbiont, 4%	None	8	0	0	0	0	R KNEE	M	Knee	3.82	413	69
1239	Low	NEG	4.47	None	None	None	None	0	0	0	0	0	L KNEE ASPIRATE	F	Knee	0.61	53	7.5
1240	Low	POS	1.47	None	None	Finegoldia_magna, 93%; Anaerococcus_lactolyticus, 4%; Campylobacter_ureolyticus, 2%	None	3	0	0	0	0	R KNEE	F	Knee	0.79	479	6.1
1241	High	POS	4.47	None	None	Enterobacter_sp, 88%	None	1	1	3	2	6	ASPIRATION R HIP	M	Hip	77.41	11627	94.3
1242	Low	NEG	4.47	None	None	None	None	0	0	0	0	0	L KNEE	F	Knee	1.03	462	10.6
1243	Low	NEG	4.46	None	None	None	None	0	0	0	0	0	R KNEE	M	Knee	0.31	252	55.6
1244	Low	NEG	6.47	None	None	None	None	0	0	3	0	3	L KNEE	F	Knee	3.51	15694	33.9
1245	Low	POS	5.42	None	None	Staphylococcus_epidermidis 94%	None	1	0	0	0	0	R KNEE	M	Knee	2.36	84	66.7
1246	Low	POS	5.42	None	None	Enterococcus_faecalis, 87%	None	1	0	0	0	0	L KNEE	F	Knee	0.31	43	23.2
1247	Low	NEG	5.42	None	None	None	None	0	0	0	0	0	L KNEE JOINT	M	Knee	3.1	1729	42.8
1248	Low	NEG	5.42	None	None	None	None	0	0	0	0	0	KNEE	M	Knee	6.55	195	30.8
1249	Low	NEG	5.41	None	None	None	None	0	0	0	0	0	R KNEE JOINT	M	Knee	0.01	236	71.2
1250	Low	NEG	5.41	None	None	None	None	0	0	0	0	0	R KNEE	M	Knee	0.02	255	40.4
1251	High	POS	2.41	None	None	Granulicatella_adiacens, 99%	None	1	1	3	2	6	R KNEE	M	Knee	7.92	7280	82
1252	High	NEG	5.41	None	None	None	None	0	1	3	2	6	R KNEE	F	Knee	39.9	10031	98.7
1253	High	NEG	5.41	None	None	None	None	0	0	3	2	5	L KNEE	M	Knee	5.48	8057	87.3
1254	Low	NEG	5.41	None	None	None	None	0	0	0	0	0	R KNEE	F	Knee	0.36	473	29.6
1255	Low	NEG	3.43	None	None	None	None	0	1	0	0	1	L KNEE	F	Knee	13.32	1202	78.6
1256	Low	NEG	3.43	None	None	None	None	0	0	0	0	0	L HIP ASPIRATE	F	Hip	0.01	1400	6.5
1257	High	NEG	3.43	None	None	None	None	0	0	3	2	5	L KNEE SYNOVIAL FL	M	Knee	6.23	37821	94.9
1258	Low	NEG	2.43	None	None	None	None	0	0	0	0	0	L KNEE	M	Knee	0.07	1071	11.8
1259	Low	NEG	5.43	None	None	None	None	0	0	0	0	0	L KNEE	F	Knee	0.69	224	50
1260	Low	NEG	2.42	None	None	None	None	0	0	0	0	0	L KNEE SWAB	M	Knee	1.86	128	13.2
1261	Low	NEG	4.45	None	None	None	None	0	0	0	0	0	L KNEE	M	Knee	0.01	23	8.7
1262	Low	NEG	4.45	None	None	None	None	0	0	3	0	3	L KNEE FLUID	F	Knee	1.47	8697	42.8
1263	High	NEG	3.43	None	None	None	None	0	1	3	0	4	L KNEE	M	Knee	36.81	69734	77.8
1264	Low	NEG	3.43	None	None	None	None	0	0	0	0	0	R KNEE	M	Knee	0.04	46	21.8
1265	High	NEG	3.43	None	None	None	None	0	1	3	2	6	L KNEE	M	Knee	11.35	13132	93.5
1266	High	NEG	3.43	None	None	None	None	0	1	3	2	6	L KNEE	M	Knee	54.74	36960	86.5
1267	Low	POS	3.43	None	None	Enterococcus_faecalis, 100%	None	1	0	0	0	0	L KNEE	F	Knee	0.01	76	18.5
1268	Low	POS	4.47292	None	None	Staphylococcus_aureus, 25%; Sphingomonas_leidyi, 17%; Cutibacterium_acnes, 17%, Stenotrophomonas_maltophilia, 10%; Sphingomonas_jaspsi, 9%; Belnapia_moabnesis, 8%; Erythrobacter_gaetbuli, 5%; Rickettsia_endosymbiont, 4%	None	8	1	0	0	1	L KNEE	F	Knee	37.53	1624	75.9
1269	Low	NEG	4.47222	None	None	None	None	0	0	0	0	0	HIP	M	Hip	3.65	1197	59.1
1270	Low	NEG	4.47153	None	None	None	None	0	1	0	0	1	L KNEE	M	Knee	8.45	128	46.9
1271	High	POS	1.47014	None	None	Finegoldia_magna, 93%; Anaerococcus_lactolyticus, 4%; Campylobacter_ureolyticus, 2%	None	3	1	3	2	6	R KNEE	F	Knee	6.98	9905	97.3
1272	High	POS	1.47014	None	None	Enterococcus_faecalis, 98%	None	1	1	3	2	6	R KNEE	M	Knee	46.84	38332	89.7
1273	Low	NEG	4.46875	None	None	None	None	0	0	0	0	0	L KNEE JOINT	F	Knee	0.06	11	9.1
1274	High	POS	4.47014	None	None	Enterobacter_sp, 88%	None	1	0	3	2	5	L KNEE	F	Knee	1.27	20258	89.3
1275	Low	NEG	6.47569	None	None	None	None	0	0	0	0	0	L KNEE	M	Knee	1.41	91	23.1
1276	High	POS	3.475	None	None	Granulicatella_adiacens, 91%; Micrococcus_luteus, 3%; Sphingomonas_leidyi, 2%	None	3	0	3	2	5	L KNEE	M	Knee	5.33	18277	90.4
1277	Low	NEG	6.47222	None	None	None	None	0	0	0	0	0	R KNEE	F	Knee	0.16	168	16.6
1278	High	POS	2.41944	None	None	Staphylococcus_aureus, 95%	None	1	1	3	2	6	L KNEE ASPIRATION	M	Knee	69.36	35910	90.7
1279	Low	NEG	5.41944	None	None	None	None	0	1	0	0	1	L HIP	F	Hip	9.97	1848	55.3
1280	Low	NEG	5.41667	None	None	None	None	0	0	0	0	0	L KNEE	F	Knee	0.57	122	39.9
1281	Low	NEG	5.41597	None	None	None	None	0	0	0	0	0	R KNEE	F	Knee	2.25	1771	68.6
1282	High	POS	5.41528	None	None	Enterococcus_faecalis, 87%	None	1	1	3	2	6	R KNEE	M	Knee	13.9	12705	91.6
1283	Low	NEG	5.41458	None	None	None	None	0	0	0	0	0	LEFT KNEE	F	Knee	5.04	2646	33.8
1284	Low	NEG	5.41389	None	None	None	None	0	0	0	0	0	R KNEE	M	Knee	0.01	112	17
1285	High	POS	2.41319	None	None	Granulicatella_adiacens, 99%	None	1	1	3	2	6	R KNEE	M	Knee	96.89	28434	97.6
1286	Low	NEG	5.4125	None	None	None	None	0	0	0	0	0	RT KNEE JOINT	M	Knee	4.72	882	64.3
1287	Low	NEG	5.4125	None	None	None	None	0	0	0	0	0	R KNEE SW	F	Knee	0.01	651	11.8
1288	Low	NEG	5.41111	None	None	None	None	0	0	0	0	0	L KNEE	M	Knee	0.59	17	17.7
1289	Low	NEG	5.41111	None	None	None	None	0	0	0	0	0	R KNEE	M	Knee	0.02	194	26.8
1290	Low	NEG	3.43403	None	None	None	None	0	0	0	0	0	R KNEE	M	Knee	1.72	48	20.8
1291	Low	NEG	3.43194	None	None	None	None	0	0	0	0	0	L KNEE	M	Knee	0.39	88	8
1292	Low	NEG	2.43056	None	None	None	None	0	0	0	0	0	R KNEE	M	Knee	0.35	107	7.5
1293	Low	NEG	3.42986	None	None	None	None	0	0	0	0	0	L KNEE SYNOVIAL FLUID	M	Knee	0.12	22	22.8
1294	Low	NEG	3.42917	None	None	None	None	0	0	0	0	0	R KNEE	F	Knee	1.44	73	50.7
1295	Low	NEG	2.43194	None	None	None	None	0	0	0	0	0	L KNEE FLUID	M	Knee	4.19	119	29.5
1296	Low	NEG	2.43194	None	None	None	None	0	0	0	0	0	R KNEE	F	Knee	0.17	66	4.5
1297	Low	NEG	5.43125	None	None	None	None	0	0	0	0	0	R KNEE	M	Knee	6.74	1323	68.8
1298	High	NEG	4.45764	None	None	None	None	0	1	3	2	6	R KNEE	F	Knee	22.41	7672	97
1299	Low	NEG	4.45694	None	None	None	None	0	1	0	0	1	R KNEE JOINT	M	Knee	11.68	253	45.1
1300	Low	NEG	4.45417	None	None	None	None	0	0	0	0	0	KNEE	F	Knee	0.05	327	8.3
1301	Low	NEG	4.45417	None	None	None	None	0	0	0	0	0	R KNEE	M	Knee	1.03	190	33.2
1302	Low	NEG	4.44931	None	None	None	None	0	0	0	0	0	R KNEE	M	Knee	0.19	160	25
1303	Low	NEG	4.45	None	None	None	None	0	1	0	0	1	L KNEE	M	Knee	10.37	280	42.5
1304	Low	POS	3.42986	None	None	Cutibacterium_acnes, 54%; Staphylococcus_epidermidis 18%	None	2	0	0	0	0	L KNEE	F	Knee	0.71	25	12
1305	Low	NEG	3.42917	None	None	None	None	0	0	0	2	2	R KNEE	F	Knee	0.44	208	85.1
1306	Low	NEG	3.42708	None	None	None	None	0	1	0	0	1	R KNEE	M	Knee	28.81	632	33.4
1307	Low	NEG	3.42708	None	None	None	None	0	0	0	0	0	L KNEE	F	Knee	0.3	60	16.7
1308	Low	NEG	3.42639	None	None	None	None	0	1	0	0	1	L KNEE	M	Knee	19.85	220	12.7
1309	High	POS	3.42569	None	Enterococcus_faecalis	Enterococcus_faecalis, 100%	None	1	1	3	2	6	R KNEE	M	Knee	47.89	50603	92.5
1310	Low	NEG	3.425	None	None	None	None	0	0	0	0	0	R KNEE	F	Knee	0.02	770	51.8
1311	Low	NEG	3.425	None	None	None	None	0	1	0	0	1	R KNEE	F	Knee	10.32	87	39.1
1312	Low	NEG	3.42361	None	None	None	None	0	1	0	0	1	R HIP	M	Hip	15.36	746	61.8
1313	High	POS	3.42292	None	None	Staphylococcus_capitis, 91%	None	1	1	3	2	6	ASPIRATION OF R KNEE	M	Knee	14.3	14413	91.8
1314	Low	NEG	6.43819	None	None	None	None	0	0	0	0	0	L KNEE	F	Knee	0.08	98	12.3
1315	High	POS	6.44167	None	None	Pasteurella_dagmatis, 100%	None	1	1	3	2	6	L KNEE	F	Knee	33.65	259056	86.8
1316	High	NEG	6.43681	None	None	None	None	0	1	3	2	6	R HIP	F	Hip	16.21	4011	81.5
1317	High	POS	6.43681	Methicillin	None	Staphylococcus_epidermidis 96%	None	1	0	3	2	5	R KNEE	M	Knee	6.85	15456	93.7
1318	Low	NEG	3.46458	None	None	None	None	0	0	0	0	0	L KNEE	M	Knee	0.05	121	16.5
1319	Low	NEG	2.46458	None	None	None	None	0	0	3	0	3	L KNEE	F	Knee	0.45	11277	33.1
1320	Low	NEG	3.46319	None	None	None	None	0	1	0	0	1	L KNEE JOINT	M	Knee	17.04	112	33
1321	Low	NEG	2.46319	None	None	None	None	0	0	0	0	0	L KNEE	F	Knee	0.15	137	27.7
1322	Low	NEG	2.46319	None	None	None	None	0	0	0	0	0	R KNEE	M	Knee	0.73	41	7.3
1323	Low	NEG	3.46181	None	None	None	None	0	0	0	0	0	R KNEE	M	Knee	2.02	34	20.6
1324	Low	POS	3.46181	None	None	Staphylococcus_lugdunensis, 90%	None	1	0	0	0	0	L KNEE	M	Knee	2.33	273	64.1
1325	High	POS	2.45417	None	None	Staphylococcus_epidermidis 83%; Pasteurella_multocida, 5%; Cutibacterium_acnes, 4%	None	3	1	3	2	6	KNEE (BURSA)	M	Knee	11.79	35028	93
1326	High	POS	2.45347	None	None	Staphylococcus_lugdunensis, 100%	None	1	0	3	2	5	L KNEE	M	Knee	6.16	5712	93.6
1327	Low	NEG	2.45347	None	None	None	None	0	0	0	2	2	L KNEE	F	Knee	1.5	2478	83.7
1328	Low	NEG	2.45417	None	None	None	None	0	0	0	0	0	R KNEE	F	Knee	3.15	280	55
1329	Low	NEG	2.45764	None	None	None	None	0	0	0	0	0	R KNEE	F	Knee	0.6	21	19.1
1330	Low	NEG	4.41181	None	None	None	None	0	0	0	0	0	L KNEE	F	Knee	0.16	63	38.1
1331	Low	NEG	4.41042	None	None	None	None	0	0	0	2	2	R KNEE	M	Knee	5.87	616	86.4
1332	Low	NEG	4.40972	None	None	None	None	0	0	0	0	0	R KNEE	M	Knee	3.94	91	61.5
1333	High	POS	4.41042	None	None	Streptococcus_mutans, 88%	None	1	0	3	2	5	R KNEE	M	Knee	5.71	11620	93.2
1334	Low	NEG	4.40903	None	None	None	None	0	0	0	0	0	R KNEE	M	Knee	1.96	98	7.2
1335	Low	NEG	4.40833	None	None	None	None	0	0	0	0	0	L KNEE	M	Knee	1.23	259	13.5
1336	Low	NEG	3.44861	None	None	None	None	0	0	0	0	0	R KNEE	M	Knee	0.16	112	18.7
1337	Low	NEG	3.44792	None	None	None	None	0	0	0	0	0	RT KNEE	M	Knee	3.78	41	12.1
1338	High	POS	3.44722	None	Staphylococcus_aureus_x000D_	Staphylococcus_aureus, 100%	None	1	1	3	2	6	KNEE JOINT FLUID	M	Knee	109.83	130291	82.2
1339	Low	NEG	3.44583	None	None	None	None	0	0	0	0	0	L KNEE WOUND	F	Knee	0.86	18	27.8
1340	Low	NEG	3.44236	None	None	None	None	0	0	0	0	0	L KNEE	F	Knee	0.71	1743	79.9
1341	Low	NEG	3.44097	None	None	None	None	0	0	0	2	2	R HIP	M	Hip	6.52	1582	85.4
1342	Low	NEG	6.46319	None	None	None	None	0	0	0	0	0	L KNEE	M	Knee	6.84	25	44
1343	Low	NEG	6.46181	None	None	None	None	0	0	0	0	0	R KNEE SWAB+FL	F	Knee	2.46	98	21.5
1344	Low	NEG	6.46181	None	None	None	None	0	1	0	0	1	L KNEE	M	Knee	47.05	238	55.8
1345	High	POS	2.46111	None	Pseudomonas_aeruginosa	Pseudomonas_aeruginosa, 53%; Serratia_marcescens, 42%; Corynebacterium_striatum, 3%	None	3	0	3	2	5	R KNEE	M	Knee	0.2	9520	84.2
1346	Low	NEG	3.45903	None	None	None	None	0	0	0	0	0	L KNEE	M	Knee	0.07	329	36.2
1347	High	POS	3.45625	None	None	Staphylococcus_capitis, 99%	None	1	1	3	0	4	L KNEE	F	Knee	16.28	6727	73.5
1348	Low	NEG	3.45556	None	None	None	None	0	1	0	0	1	R KNEE	F	Knee	7.71	294	54.7
1349	Low	NEG	3.45347	None	None	None	None	0	0	0	0	0	R HIP FLUID	M	Hip	1.15	1848	47.3
1350	Low	NEG	3.45347	None	None	None	None	0	0	0	0	0	L KNEE	M	Knee	0.03	49	28.6
1351	High	NEG	3.45139	None	None	None	None	0	1	3	0	4	R KNEE	F	Knee	9.26	14224	48.7
1352	Low	NEG	5.44861	None	None	None	None	0	0	0	0	0	L KNEE	M	Knee	1.64	37	24.4
1353	High	NEG	5.44861	None	None	None	None	0	1	3	2	6	L KNEE	F	Knee	12.09	5397	84
1354	Low	NEG	5.44653	None	None	None	None	0	0	0	0	0	RT KNEE	F	Knee	1.3	189	40.8
1355	Low	NEG	2.44514	None	None	None	None	0	1	0	0	1	R KNEE	M	Knee	13.63	238	64.7
1356	Low	NEG	5.44444	None	None	None	None	0	0	0	0	0	L KNEE	M	Knee	0.14	142	16.9
1357	Low	NEG	2.44375	None	None	None	None	0	1	0	0	1	R KNEE	M	Knee	11.18	119	35.3
1358	Low	NEG	2.44306	None	None	None	None	0	0	0	0	0	RIGHT HIP	M	Hip	1.66	79	30.4
1359	High	POS	4.42083	None	None	Staphylococcus_epidermidis 96%	None	1	0	3	2	5	L HIP	M	Hip	1.82	76167	97.5
1360	Low	NEG	4.41944	None	None	None	None	0	0	0	0	0	L KNEE	M	Knee	0.19	97	27.9
1361	Low	NEG	4.41875	None	None	None	None	0	0	0	0	0	R KNEE	F	Knee	0.41	75	69.3
1362	High	POS	1.41875	None	None	Staphylococcus_epidermidis 94%	None	1	1	3	2	6	R KNEE	M	Knee	27.21	41349	94.1
1363	High	NEG	4.41875	None	None	None	None	0	1	3	2	6	L KNEE ASPIRATION	M	Knee	22.64	18627	95.4
1364	Low	NEG	4.41875	None	None	None	None	0	0	0	0	0	L KNEE	M	Knee	0.22	83	30.1
1365	Low	NEG	4.41806	None	None	None	None	0	0	0	2	2	R KNEE	M	Knee	2.81	588	95.2
1366	Low	NEG	4.41667	None	None	None	None	0	0	0	0	0	L PROSTHETIC KNEE JOINT SYNOVIAL FLUID	F	Knee	0.05	238	14.7
1367	Low	NEG	4.41736	None	None	None	None	0	0	0	0	0	L KNEE	M	Knee	5.95	310	14.8
1368	Low	NEG	4.41528	None	None	None	None	0	0	0	0	0	R KNEE	F	Knee	2.22	24	20.8
1369	Low	NEG	4.41458	None	None	None	None	0	1	0	0	1	RIGHT HIP	M	Hip	18.04	861	71.5
1370	High	POS	1.41458	None	Streptococcus_agalactiae	Streptococcus_agalactiae, 84%; Staphylococcus_aureus, 14%	None	2	1	3	2	6	R HIP	M	Hip	8.88	30170	94.3
1371	Low	NEG	6.43681	None	None	None	None	0	0	0	0	0	R KNEE	F	Knee	0.02	35	25.7
1372	Low	NEG	6.43472	None	None	None	None	0	0	0	0	0	R KNEE FLUID	M	Knee	1.09	42	38.1
1373	Low	NEG	3.43542	None	None	None	None	0	0	0	2	2	L KNEE	M	Knee	6.76	248	80.6
1374	High	POS	3.43472	Methicillin	None	Staphylococcus_epidermidis 98%	None	1	1	3	2	6	L HIP	M	Hip	96.34	53542	93.9
1375	Low	POS	3.43403	None	Streptococcus_agalactiae	Streptococcus_agalactiae, 95%; Staphylococcus_epidermidis 4%	None	2	0	0	0	0	RIGHT KNEE	M	Knee	0.02	216	28.8
1376	Low	NEG	6.43333	None	None	None	None	0	0	0	0	0	R KNEE	M	Knee	0.01	333	22.8
1377	Low	NEG	3.43333	None	None	None	None	0	0	0	0	0	KNEE	M	Knee	1.45	24	4.1
1378	Low	NEG	5.51111	None	None	None	None	0	0	0	0	0	L HIP FLUID	M	Hip	1.58	57	19.3
1379	Low	NEG	5.51111	None	None	None	None	0	0	0	0	0	R KNEE FLUID	F	Knee	1.06	584	7.2
1380	High	POS	2.50833	Methicillin, Aminoglycoside	None	Staphylococcus_epidermidis 100%	None	1	0	3	2	5	L KNEE	M	Knee	4.82	47467	97.5
1381	Low	NEG	5.40208	None	None	None	None	0	0	0	0	0	L KNEE JOINT FL	F	Knee	0.09	46	13
1382	Low	NEG	2.42153	None	None	None	None	0	0	0	0	0	L KNEE	F	Knee	0.01	115	27
1383	Low	NEG	2.41806	None	None	None	None	0	0	0	0	0	L KNEE	F	Knee	0.23	179	34.1
1384	High	POS	1.41736	None	None	Corynebacterium_striatum, 100%	None	1	1	3	2	6	L KNEE	F	Knee	8.88	11067	82
1385	High	POS	6.46042	Methicillin	None	Staphylococcus_epidermidis 97%	None	1	1	3	2	6	L KNEE	M	Knee	7.55	11809	97
1386	Low	NEG	2.46042	None	None	None	None	0	0	3	0	3	KNEE	F	Knee	0.35	3857	73
1387	High	NEG	2.45972	None	None	None	None	0	1	3	2	6	L KNEE	M	Knee	10.71	38458	97.3
1388	Low	NEG	5.41597	None	None	None	None	0	0	0	0	0	R KNEE	M	Knee	2.04	1561	11.9
1389	Low	NEG	5.41528	None	None	None	None	0	1	0	2	3	KNEE	M	Knee	23.38	1829	82.7
1390	Low	NEG	5.41528	None	None	None	None	0	0	0	0	0	L KNEE	F	Knee	0.01	24	4.1
1391	Low	POS	5.41528	None	None	None	Candida_parapsilosis, 100%	1	0	0	0	0	R KNEE	M	Knee	1.64	2737	65.2
1392	Low	NEG	5.41458	None	None	None	None	0	0	0	0	0	L KNEE	M	Knee	0.01	44	36.4
1393	Low	NEG	5.41319	None	None	None	None	0	0	0	0	0	R KNEE JOINT	F	Knee	0.48	232	10.3
1394	Low	NEG	5.41319	None	None	None	None	0	1	0	0	1	L KNEE	M	Knee	27.29	92	68.5
1395	Low	POS	5.4125	None	None	Neisseria_mucosa, 60%; Streptococcus_sanguinis, 30%	None	2	0	0	0	0	L KNEE	M	Knee	1.7	1449	68.6
1396	Low	NEG	4.40417	None	None	None	None	0	0	0	0	0	R HIP	M	Hip	0.8	482	21.4
1397	Low	NEG	4.40347	None	None	None	None	0	0	0	0	0	L KNEE	F	Knee	0.66	34	23.6
1398	Low	NEG	4.40278	None	None	None	None	0	0	0	0	0	R HIP	M	Hip	0.01	2	50
1399	Low	NEG	4.40208	None	None	None	None	0	0	0	0	0	R KNEE	F	Knee	0.01	112	12.4
1400	Low	NEG	4.40208	None	None	None	None	0	0	0	0	0	R KNEE	M	Knee	1.02	106	11.3
1401	Low	NEG	4.40069	None	None	None	None	0	0	0	0	0	L HIP	F	Hip	3.97	152	21.7
1402	Low	NEG	6.42847	None	None	None	None	0	0	0	0	0	R KNEE	F	Knee	1.02	1252	21.6
1403	Low	NEG	6.42778	None	None	None	None	0	0	0	0	0	L KNEE SYNOVIAL FLUID	F	Knee	0.01	32	15.6
1404	Low	NEG	6.42708	None	None	None	None	0	0	0	0	0	R KNEE	F	Knee	0.04	66	9
1405	Low	NEG	6.42708	None	None	None	None	0	0	0	0	0	KNEE/JOINT FLUID	F	Knee	1.08	62	17.7
1406	High	POS	3.42639	None	Streptococcus_agalactiae	Streptococcus_agalactiae, 100%	None	1	1	3	2	6	L KNEE	F	Knee	32.61	91490	94.8
1407	Low	NEG	6.42431	None	None	None	None	0	1	0	0	1	L KNEE	F	Knee	10.39	1484	53.7
1408	Low	POS	6.42431	None	None	None	Candida_parapsilosis, 99%	1	0	0	0	0	R KNEE	F	Knee	0.59	574	63.4
1409	Low	POS	5.3875	None	Pseudomonas_aeruginosa	Pseudomonas_aeruginosa, 100%	None	1	0	0	0	0	L HIP	F	Hip	0.09	128	71.1
1410	Low	NEG	2.38681	None	None	None	None	0	0	0	0	0	L HIP	M	Hip	6.88	498	41.9
1411	Low	NEG	2.38542	None	None	None	None	0	0	0	0	0	L KNEE	F	Knee	0.15	163	28.9
1412	Low	NEG	2.38542	None	None	None	None	0	0	0	0	0	R KNEE JOINT SYNOVIAL FL	F	Knee	1.83	132	29.5
1413	High	POS	1.38333	None	None	Granulicatella_adiacens, 98%	None	1	1	3	2	6	L KNEE	M	Knee	61.86	14063	94.2
1414	Low	NEG	2.38194	None	None	None	None	0	0	0	0	0	R KNEE	F	Knee	1.33	223	24.2
1415	Low	NEG	4.3875	None	None	None	None	0	0	0	0	0	L KNEE	M	Knee	5.82	110	41.8
1416	Low	NEG	4.38681	None	None	None	None	0	0	0	0	0	R KNEE	M	Knee	0.01	205	13.2
1417	Low	NEG	4.38403	None	None	None	None	0	0	0	0	0	L KNEE	M	Knee	0.03	48	27
1418	Low	NEG	4.38333	None	None	None	None	0	0	0	0	0	R KNEE	M	Knee	0.84	75	49.4
1419	Low	POS	4.38056	None	None	Staphylococcus_aureus, 99%	None	1	0	0	0	0	R KNEE	F	Knee	1.62	156	39.1
1420	Low	NEG	4.38056	None	None	None	None	0	0	0	0	0	R HIP JOINT	M	Hip	0.01	215	24.2
1421	High	POS	3.41458	Methicillin	None	Staphylococcus_epidermidis 99%	None	1	1	3	2	6	R HIP	M	Hip	11.7	79226	94.6
1422	Low	NEG	6.41319	None	None	None	None	0	0	0	0	0	R KNEE	M	Knee	0.05	71	11.2
1423	High	POS	3.4125	None	Pseudomonas_aeruginosa	Pseudomonas_aeruginosa, 83%	None	1	0	3	2	5	L KNEE	F	Knee	6.17	4501	80.4
1424	High	POS	6.40972	None	None	Haemophilus_parainfluenzae, 99%	None	1	1	3	2	6	R KNEE	F	Knee	77.43	4316	97.5
1425	High	NEG	10.4083	None	None	None	None	0	1	3	2	6	R KNEE	F	Knee	14.3	3290	90
1426	Low	NEG	3.40764	None	None	None	None	0	0	0	0	0	L KNEE	F	Knee	0.24	139	51.8
1427	Low	NEG	3.40764	None	None	None	None	0	0	0	0	0	R KNEE	F	Knee	0.43	247	11.8
1428	Low	NEG	3.40764	None	None	None	None	0	0	0	0	0	R KNEE	F	Knee	1.67	124	6.4
1429	Low	NEG	5.42014	None	None	None	None	0	0	0	0	0	L KNEE	F	Knee	0.84	1294	52.1
1430	Low	NEG	5.41875	None	None	None	None	0	0	0	0	0	R KNEE	M	Knee	1.59	483	8.3
1431	High	POS	5.41875	None	None	Cutibacterium_acnes, 100%	None	1	1	3	2	6	R KNEE	F	Knee	18.96	7728	86.9
1432	High	POS	5.41667	None	None	Staphylococcus_lugdunensis, 100%	None	1	1	3	2	6	L KNEE	M	Knee	47.89	14798	95.6
1433	Low	NEG	5.41528	None	None	None	None	0	0	0	0	0	KNEE	M	Knee	0.14	8	12.5
1434	High	POS	5.41389	None	None	Enterobacter_cloacae, 78%; Klebsiella_aerogenes, 21%	None	2	1	3	2	6	R KNEE FL	M	Knee	17.88	41818	89
1435	Low	NEG	5.37986	None	None	None	None	0	0	0	0	0	L KNEE	M	Knee	0.92	76	17.1
1436	High	POS	1.45	None	None	Capnocytophaga_canimorsus, 98%	None	1	0	3	2	5	L KNEE	M	Knee	0.32	12838	92.4
1437	Low	POS	1.44306	Methicillin	None	Micrococcus_luteus, 54%; Staphylococcus_haemolyticus, 40%; Staphylococcus_epidermidis 3%	None	3	1	0	0	1	R KNEE	M	Knee	7.96	67	16.4
1438	Low	NEG	3.44236	None	None	None	None	0	0	0	0	0	L KNEE JOINT	F	Knee	0.04	12	8.3
1439	Low	NEG	2.44167	None	None	None	None	0	1	0	0	1	L KNEE FL	M	Knee	16.35	2940	72.6
1440	Low	NEG	3.44167	None	None	None	None	0	0	0	0	0	R KNEE	F	Knee	1.87	145	33.1
1441	Low	NEG	2.42569	None	None	None	None	0	0	0	0	0	R KNEE	M	Knee	0.21	85	27
1442	Low	NEG	2.42431	None	None	None	None	0	1	0	0	1	L KNEE	M	Knee	28.85	1323	69.8
1443	Low	NEG	4.38403	None	None	None	None	0	1	0	0	1	L KNEE JOINT	F	Knee	12.37	242	19.8
1444	Low	NEG	4.38333	None	None	None	None	0	0	0	0	0	L KNEE	F	Knee	0.02	38	34.2
1445	Low	NEG	4.38264	None	None	None	None	0	0	0	0	0	R KNEE	F	Knee	0.01	46	10.9
1446	Low	NEG	4.37708	None	None	None	None	0	0	0	0	0	L KNEE	M	Knee	0.32	17	5.9
1447	Low	NEG	4.375	None	None	None	None	0	1	0	0	1	MEDIAL INFERIOR SUBCUTANEOUS L KNEE	F	Knee	23.4	231	30.3
1448	Low	NEG	4.37361	None	None	None	None	0	0	0	0	0	L HIP	M	Hip	0.01	10	30
1449	Low	NEG	6.33819	None	None	None	None	0	0	0	0	0	L KNEE	F	Knee	0.4	104	44.3
1450	Low	NEG	3.33819	None	None	None	None	0	0	0	0	0	L KNEE	M	Knee	0.06	30	6.7
1451	Low	NEG	6.33611	None	None	None	None	0	0	0	0	0	L KNEE	F	Knee	6.38	1001	35.8
1452	Low	NEG	6.33333	None	None	None	None	0	0	0	0	0	L KNEE	F	Knee	6.65	276	75
1453	High	NEG	6.33125	None	None	None	None	0	0	3	2	5	RIGHT KNEE	M	Knee	0.02	7021	86.5
1454	Low	NEG	6.32986	None	None	None	None	0	0	0	0	0	L KNEE	M	Knee	1.27	9	33.3
1455	Low	NEG	6.32847	None	None	None	None	0	0	0	0	0	R KNEE	M	Knee	0.01	219	14.7
1456	Low	NEG	6.32708	None	None	None	None	0	0	0	0	0	R KNEE	M	Knee	0.02	32	3.1
1457	High	NEG	3.32569	None	None	None	None	0	1	3	2	6	R KNEE	M	Knee	11.68	26761	96.4
1458	Low	NEG	6.32569	None	None	None	None	0	0	0	0	0	L HIP	F	Hip	0.01	70	14.3
1459	Low	NEG	6.32431	None	None	None	None	0	0	0	0	0	R KNEE ASPIRATE	F	Knee	0.01	143	7.7
1460	Low	NEG	6.32431	None	None	None	None	0	0	0	0	0	R HIP JOINT	F	Hip	0.01	475	26.5
1461	Low	NEG	5.35972	None	None	None	None	0	0	0	0	0	L KNEE	F	Knee	0.67	34	32.3
1462	Low	NEG	5.35903	None	None	None	None	0	0	0	0	0	R KNEE	M	Knee	0.01	14	28.6
1463	Low	NEG	5.35903	None	None	None	None	0	0	0	0	0	L KNEE	M	Knee	0.09	50	32
1464	Low	NEG	5.35764	None	None	None	None	0	0	0	0	0	L KNEE JOINT	M	Knee	0.12	47	25.5
1465	Low	NEG	5.35694	None	None	None	None	0	0	0	0	0	R KNEE	M	Knee	0.03	57	38.6
1466	Low	NEG	5.35694	None	None	None	None	0	0	0	0	0	L KNEE	F	Knee	0.09	440	29.1
1467	Low	NEG	5.35764	None	None	None	None	0	0	0	0	0	R KNEE	M	Knee	0.08	15	46.6
1468	Low	NEG	5.35556	None	None	None	None	0	1	0	0	1	L KNEE	M	Knee	45.77	150	62
1469	High	POS	2.35556	Methicillin	None	Staphylococcus_epidermidis 91%; Lactobacillus_crispatus, 2%	None	2	1	3	0	4	L KNEE	M	Knee	14.27	40418	67.3
1470	Low	NEG	3.41806	None	None	None	None	0	0	0	0	0	R KNEE	M	Knee	0.94	31	25.8
1471	High	POS	3.41806	None	None	Enterococcus_faecalis, 92%	None	1	1	3	2	6	R HIP	M	Hip	58.09	6503	96.7
1472	Low	NEG	3.41458	None	None	None	None	0	0	0	0	0	R KNEE	M	Knee	0.95	1939	46.9
1473	Low	NEG	3.41389	None	None	None	None	0	0	0	0	0	R KNEE	M	Knee	0.01	191	45
1474	Low	NEG	3.4125	None	None	None	None	0	0	0	0	0	R KNEE	F	Knee	1.7	71	36.6
1475	High	POS	3.41111	None	None	Staphylococcus_aureus, 93%	None	1	1	3	2	6	R KNEE	M	Knee	29.87	5404	93.2
1476	Low	NEG	3.40764	None	None	None	None	0	0	0	0	0	L KNEE JOINT	M	Knee	0.48	30	63.4
1477	High	POS	4.42083	Methicillin	None	Staphylococcus_epidermidis 99%	None	1	0	3	2	5	L KNEE	M	Knee	1.8	12768	95.4
1478	Low	NEG	4.41597	None	None	None	None	0	0	0	0	0	R KNEE	M	Knee	0.01	19	47.4
1479	Low	NEG	4.41736	None	None	None	None	0	0	0	0	0	R KNEE	F	Knee	0.25	489	74
1480	High	POS	1.41458	None	None	Staphylococcus_capitis, 97%	None	1	0	3	2	5	L HIP	M	Hip	0.01	11851	93.1
1481	Low	NEG	4.41319	None	None	None	None	0	0	0	0	0	R KNEE	M	Knee	0.23	31	22.5
1482	Low	NEG	4.41111	None	None	None	None	0	1	0	0	1	R KNEE	M	Knee	10.25	190	41
1483	Low	NEG	3.41944	None	None	None	None	0	0	0	0	0	R HIP	F	Hip	0.01	330	23.6
1484	High	POS	3.41875	Aminoglycoside	Staphylococcus_aureus_x000D_	Staphylococcus_aureus, 96%	None	1	1	3	2	6	L HIP	M	Hip	28.04	53550	95.3
1485	Low	NEG	3.41875	None	None	None	None	0	0	0	0	0	L HIP	M	Hip	0.01	113	25.6
1486	Low	NEG	3.41667	None	None	None	None	0	1	0	0	1	L KNEE	F	Knee	28.3	437	48.3
1487	Low	NEG	3.41597	None	None	None	None	0	0	0	0	0	R KNEE	F	Knee	0.28	13	46.1
1488	Low	NEG	3.41597	None	None	None	None	0	0	0	0	0	L KNEE	F	Knee	0.02	180	13.3
1489	High	POS	6.37431	None	None	Staphylococcus_lugdunensis, 72%	None	1	0	3	2	5	R KNEE	M	Knee	2.46	17276	93.6
1490	High	POS	6.37014	None	None	Staphylococcus_aureus, 81%	None	1	1	3	2	6	L KNEE	F	Knee	11.96	21938	95.9
1491	Low	NEG	6.37083	None	None	None	None	0	0	0	0	0	R KNEE	F	Knee	3.78	1831	77.6
1492	Low	NEG	5.36944	None	None	None	None	0	0	0	0	0	R KNEE FLUID	M	Knee	0.19	15	53.3
1493	Low	NEG	6.36875	None	None	None	None	0	0	0	0	0	R KNEE	M	Knee	1.79	1547	68.8
1494	High	POS	6.36806	None	None	Staphylococcus_capitis, 73%	None	1	1	3	2	6	L HIP	F	Hip	11.44	6062	97.8
1495	Low	NEG	6.36806	None	None	None	None	0	0	0	0	0	KNEE	F	Knee	0.01	15	40
1496	Low	NEG	6.36667	None	None	None	None	0	0	0	0	0	R HIP JOINT	F	Hip	0.75	630	13.3
1497	Low	NEG	6.36667	None	None	None	None	0	0	0	0	0	L KNEE SYNOVIAL	F	Knee	2.2	300	57
1498	Low	NEG	5.36597	None	None	None	None	0	0	0	0	0	R KNEE	M	Knee	0.05	20	30
1499	Low	NEG	5.36458	None	None	None	None	0	0	0	0	0	R KNEE	M	Knee	1.15	15	20
1500	Low	NEG	5.36389	None	None	None	None	0	0	0	0	0	R KNEE	F	Knee	6.62	379	53.1
1501	Low	NEG	2.34583	None	None	None	None	0	0	0	0	0	R KNEE	M	Knee	0.45	15	13.3
1502	Low	NEG	2.34028	None	None	None	None	0	0	0	0	0	R KNEE	M	Knee	0.72	7	14.3
1503	High	POS	1.33889	Methicillin	None	Staphylococcus_epidermidis 98%	None	1	0	3	2	5	R HIP	M	Hip	2.4	16184	87.4
1504	Low	NEG	2.33819	None	None	None	None	0	1	0	0	1	R KNEE	F	Knee	30.54	964	55.3
1505	Low	NEG	2.33611	None	None	None	None	0	0	0	0	0	L KNEE	F	Knee	3.55	574	78.4
1506	Low	NEG	2.33472	None	None	None	None	0	0	0	0	0	L KNEE	M	Knee	3.97	27	3.7
1507	Low	NEG	5.40486	None	None	None	None	0	0	0	0	0	R HIP	F	Hip	5.25	58	51.7
1508	High	POS	1.39167	None	None	Staphylococcus_lugdunensis, 98%	None	1	1	3	2	6	L KNEE ARTHROPLASTY	F	Knee	33.99	52388	94.2
1509	Low	NEG	4.38889	None	None	None	None	0	0	0	0	0	L KNEE	M	Knee	0.01	427	8.2
1510	Low	NEG	4.38472	None	None	None	None	0	0	0	0	0	L KNEE	F	Knee	0.09	182	38.5
1511	Low	NEG	4.38125	None	None	None	None	0	0	0	0	0	L KNEE	F	Knee	0.01	273	9.1
1512	Low	NEG	4.37986	None	None	None	None	0	0	0	0	0	L KNEE	F	Knee	0.13	42	23.8
1513	High	POS	4.37917	None	None	Streptococcus_dysgalactiae, 90%	None	1	1	3	0	4	L KNEE	F	Knee	36.59	5600	72.8
1514	Low	NEG	4.37569	None	None	None	None	0	0	0	0	0	R HIP	F	Hip	0.01	152	13.8
1515	Low	NEG	4.375	None	None	None	None	0	0	0	0	0	L KNEE	F	Knee	4.24	106	52.8
1516	High	POS	1.37014	Methicillin; Aminoglycoside; Tetracycline	Staphylococcus_aureus_x000D_	Staphylococcus_aureus, 100%	None	1	1	3	2	6	R HIP	F	Hip	12.65	27986	91.4
1517	Low	NEG	6.32569	None	None	None	None	0	0	0	0	0	R HIP JOINT FL	F	Hip	0.01	259	13.5
1518	Low	NEG	3.325	None	None	None	None	0	0	0	0	0	R KNEE	F	Knee	1.44	2107	51.1
1519	Low	NEG	6.32361	None	None	None	None	0	1	0	0	1	L KNEE	M	Knee	11.86	1764	57.1
1520	Low	NEG	6.32292	None	None	None	None	0	0	0	2	2	R HIP	M	Hip	0.01	5	80
1521	Low	NEG	6.32222	None	None	None	None	0	0	0	0	0	R KNEE	M	Knee	2.03	798	50
1522	High	POS	3.32153	None	None	Staphylococcus_epidermidis 96%	None	1	0	3	2	5	L KNEE	F	Knee	1.08	24619	97.9
1523	High	NEG	6.32083	None	None	None	None	0	1	3	2	6	R KNEE	M	Knee	103.3	93541	94.9
1524	Low	POS	3.31875	None	Staphylococcus_aureus_x000D_	Staphylococcus_aureus, 98%	None	1	1	0	0	1	L KNEE	M	Knee	11.59	560	64.9
1525	Low	NEG	5.37708	None	None	None	None	0	0	0	0	0	L KNEE	M	Knee	0.71	20	20
1526	Low	NEG	5.375	None	None	None	None	0	0	0	0	0	R KNEE	M	Knee	1.37	49	71.4
1527	High	POS	2.375	None	None	Citrobacter_koseri, 99%	None	1	1	3	2	6	R KNEE JOINT	M	Knee	28.17	27895	89.5
1528	Low	NEG	5.37431	None	None	None	None	0	0	0	0	0	L KNEE	M	Knee	1.87	10	30
1529	Low	NEG	2.33958	None	None	None	None	0	0	0	0	0	L TOTAL KNEE	M	Knee	0.31	388	23.7
1530	Low	NEG	3.33403	None	None	None	None	0	0	0	0	0	R KNEE JOINT	F	Knee	1.47	47	4.2
1531	Low	NEG	3.33403	None	None	None	None	0	1	0	0	1	L KNEE	M	Knee	8.01	508	60.6
1532	High	POS	1.33194	None	None	Serratia_marcescens, 100%	None	1	1	3	0	4	R KNEE JOINT	M	Knee	31.94	156570	39.7
1533	Low	NEG	3.33056	None	None	None	None	0	0	0	0	0	RIGHT KNEE	M	Knee	0.01	87	31.1
1534	Low	NEG	5.38611	None	None	None	None	0	0	0	0	0	R HIP	M	Hip	0.25	800	17.5
1535	Low	NEG	5.38542	None	None	None	None	0	0	0	0	0	R KNEE	F	Knee	0.36	113	39.8
1536	High	POS	5.38542	None	Pseudomonas_aeruginosa	Pseudomonas_aeruginosa, 94%	None	1	1	3	2	6	KNEE	M	Knee	14.27	5950	87.3
1537	Low	NEG	5.38125	None	None	None	None	0	0	0	0	0	R KNEE	F	Knee	0.01	115	35.7
1538	Low	NEG	5.38056	None	None	None	None	0	0	0	0	0	L KNEE	M	Knee	0.02	162	12.3
1539	Low	NEG	5.38056	None	None	None	None	0	0	0	0	0	R KNEE	M	Knee	0.06	92	15.2
1540	Low	NEG	5.37986	None	None	None	None	0	0	0	0	0	L HIP	F	Hip	0.01	6	50
1541	Low	NEG	4.36389	None	None	None	None	0	0	0	0	0	L HIP	M	Hip	0.01	30	6.7
1542	Low	NEG	4.36042	None	None	None	None	0	0	0	0	0	L KNEE	M	Knee	0.41	13	23.1
1543	Low	NEG	4.35139	None	None	None	None	0	0	0	0	0	L KNEE	F	Knee	0.16	123	17.8
1544	High	POS	1.35	Methicillin; Aminoglycoside	Staphylococcus_aureus_x000D_	Staphylococcus_aureus, 98%	None	1	1	3	2	6	L KNEE	M	Knee	7.91	12152	97
1545	Low	NEG	3.38889	None	None	None	None	0	0	0	0	0	LEFT KNEE	M	Knee	0.03	38	15.7
1546	High	POS	3.3875	Methicillin	None	Staphylococcus_epidermidis 48%; Staphylococcus_lugdunensis, 37%	None	2	1	3	2	6	R KNEE	M	Knee	46.18	10444	96
1547	Low	NEG	3.38681	None	None	None	None	0	0	0	0	0	R KNEE	F	Knee	0.07	65	23
1548	Low	NEG	3.38611	None	None	None	None	0	0	0	0	0	R HIP	F	Hip	0.64	349	42.4
1549	Low	NEG	3.38611	None	None	None	None	0	0	0	0	0	R KNEE	F	Knee	0.09	109	18.4
1550	Low	NEG	3.38542	None	None	None	None	0	0	0	0	0	L HIP	M	Hip	2.69	44	20.5
1551	Low	NEG	3.38472	None	None	None	None	0	0	0	0	0	L KNEE	M	Knee	0.5	39	38.4
1552	Low	NEG	3.38403	None	None	None	None	0	0	0	0	0	LT KNEE	M	Knee	0.24	30	30
1553	Low	NEG	6.38264	None	None	None	None	0	0	0	0	0	KNEE FLUID AND SWAB	F	Knee	5.83	327	20.2
1554	Low	NEG	5.32431	None	None	None	None	0	1	0	0	1	R HIP	M	Hip	22.88	1023	64.4
1555	Low	NEG	5.32431	None	None	None	None	0	0	0	0	0	R HIP	F	Hip	0.47	532	17.1
1556	Low	NEG	5.32292	None	None	None	None	0	0	0	0	0	L KNEE	F	Knee	1.03	30	56.6
1557	Low	NEG	5.32153	None	None	None	None	0	0	0	0	0	R KNEE	F	Knee	0.01	36	27.8
1558	Low	NEG	5.32153	None	None	None	None	0	0	0	0	0	LT KNEE	F	Knee	0.17	4	0
1559	Low	NEG	5.32014	None	None	None	None	0	1	0	0	1	L KNEE	M	Knee	11.12	203	59.1
1560	Low	NEG	5.31736	None	None	None	None	0	0	0	0	0	R KNEE	M	Knee	0.96	960	47.9
1561	Low	NEG	5.31597	None	None	None	None	0	0	0	0	0	R HIP	F	Hip	0.01	286	22.4
1562	Low	NEG	3.36667	None	None	None	None	0	0	0	0	0	L KNEE SYNOVIAL FLUID	F	Knee	0.13	471	22.3
1563	Low	NEG	2.36528	None	None	None	None	0	0	0	0	0	L KNEE JOINT	F	Knee	0.01	34	17.7
1564	High	POS	1.36389	None	None	None	Candida_parapsilosis, 100%	1	1	3	0	4	L KNEE	M	Knee	17.13	3201	65.6
1565	Low	NEG	3.3625	None	None	None	None	0	1	0	0	1	L KNEE	F	Knee	78.96	952	74.7
1566	High	NEG	3.34931	None	None	None	None	0	1	3	2	6	L HIP JOINT	M	Hip	10.2	11669	93.3
1567	Low	POS	1.49167	None	None	Bacillus_sp, 100%	None	1	0	0	0	0	L KNEE	M	Knee	0.01	177	11.3
1568	Low	NEG	5.37569	None	None	None	None	0	0	0	0	0	L KNEE	M	Knee	5.65	47	8.5
1569	Low	NEG	5.37569	None	None	None	None	0	0	0	0	0	RT KNEE	F	Knee	0.23	917	54.2
1570	Low	NEG	5.37431	None	None	None	None	0	1	0	0	1	L HIP	F	Hip	26.14	1015	64.1
1571	High	NEG	4.39653	None	None	None	None	0	1	3	2	6	L KNEE	M	Knee	41.89	6804	85.9
1572	Low	NEG	4.39583	None	None	None	None	0	1	0	0	1	R KNEE	M	Knee	8.79	287	5.2
1573	High	POS	4.39444	None	None	Corynebacterium_striatum, 90%	None	1	1	3	2	6	KNEE	F	Knee	7.07	39683	89.8
1574	Low	NEG	4.39444	None	None	None	None	0	0	0	0	0	KNEE	M	Knee	0.74	88	44.3
1575	Low	NEG	4.39306	None	None	None	None	0	0	0	0	0	R KNEE	M	Knee	0.02	113	27.5
1576	High	NEG	4.39097	None	None	None	None	0	1	3	2	6	R HIP ASPIRATION	F	Hip	27.76	6968	90.9
1577	Low	NEG	4.39097	None	None	None	None	0	0	0	0	0	L KNEE	M	Knee	5	419	4.3
1578	Low	NEG	4.38958	None	None	None	None	0	0	0	0	0	L KNEE	F	Knee	0.01	62	43.5
1579	Low	NEG	4.3875	None	None	None	None	0	0	0	0	0	KNEE JOINT	M	Knee	5.49	79	51.9
1580	Low	POS	6.50972	None	None	Staphylococcus_lugdunensis, 95%	None	1	1	0	0	1	RT TKA	M	Knee	13	1771	63.6
1581	Low	NEG	3.50903	None	None	None	None	0	0	0	2	2	L KNEE	F	Knee	2.74	468	80.1
1582	High	POS	6.50903	None	None	Enterococcus_faecalis, 97%	None	1	1	3	2	6	L KNEE	F	Knee	40.69	8834	91.1
1583	Low	NEG	3.50833	None	None	None	None	0	0	0	0	0	HIP	F	Hip	0.54	71	43.6
1584	Low	NEG	3.50833	None	None	None	None	0	0	0	0	0	LEFT HIP	F	Hip	2.64	71	33.8
1585	Low	NEG	6.50625	None	None	None	None	0	0	0	0	0	L KNEE JOINT FL	F	Knee	2.56	485	25.3
1586	Low	NEG	3.50625	None	None	None	None	0	0	0	0	0	L KNEE	M	Knee	0.01	52	25
1587	Low	NEG	3.50486	None	None	None	None	0	0	0	0	0	R KNEE JOINT FL	M	Knee	4.53	2968	75.7
1588	Low	NEG	3.50417	None	None	None	None	0	0	3	0	3	L HIP	F	Hip	0.09	7098	77.9
1589	Low	NEG	6.50417	None	None	None	None	0	0	0	0	0	R HIP JOINT	F	Hip	0.02	2219	33.1
1590	Low	NEG	3.49028	None	None	None	None	0	1	0	0	1	R KNEE	M	Knee	26.2	455	32.3
1591	Low	POS	2.37986	None	None	Staphylococcus_epidermidis 33%; Cutibacterium_acnes, 24%; Finegoldia_magna, 23%	Coccidioides_posadasii, 99%	4	0	0	0	0	R KNEE JOINT	F	Knee	1.81	805	59.2
1592	Low	NEG	5.36389	None	None	None	None	0	0	0	0	0	R KNEE FLUID	F	Knee	0.31	122	52.4
1593	Low	NEG	5.37569	None	None	None	None	0	0	0	0	0	L KNEE	M	Knee	0.01	125	72
1594	Low	NEG	2.38194	None	None	None	None	0	0	0	0	0	RT KNEE	M	Knee	2.61	31	51.6
1595	Low	NEG	2.37569	None	None	None	None	0	0	0	0	0	R HIP	F	Hip	0.01	1890	21.5
1596	Low	NEG	2.44931	None	None	None	None	0	0	0	0	0	R KNEE SW	M	Knee	5.41	290	20
1597	Low	NEG	2.44861	None	None	None	None	0	0	0	0	0	R KNEE	M	Knee	2.21	354	57.9
1598	High	POS	1.44167	None	Staphylococcus_aureus_x000D_	Staphylococcus_aureus, 100%	None	1	1	3	2	6	R KNEE	F	Knee	126.02	107814	86.8
1599	Low	NEG	2.44236	None	None	None	None	0	0	0	0	0	L KNEE	M	Knee	0.01	126	42.1
1600	Low	NEG	2.44028	None	None	None	None	0	0	0	0	0	L KNEE ASPIRATE	F	Knee	0.83	75	22.6
1601	Low	NEG	2.44028	None	None	None	None	0	0	0	0	0	R KNEE	F	Knee	0.65	2450	61.2
1602	Low	NEG	4.40208	None	None	None	None	0	0	0	0	0	L KNEE	F	Knee	0.02	191	13.6
1603	Low	NEG	4.39861	None	None	None	None	0	0	0	0	0	R KNEE	F	Knee	0.96	64	32.8
1604	High	POS	4.39792	None	None	Serratia_marcescens, 98%	None	1	0	3	2	5	L KNEE	M	Knee	2.62	53018	92.7
1605	Low	NEG	4.39722	None	None	None	None	0	0	0	0	0	RIGHT KNEE	F	Knee	0.01	2184	56.3
1606	Low	NEG	4.39375	None	None	None	None	0	1	0	0	1	RT KNEE	F	Knee	8.44	54	16.7
1607	Low	NEG	4.39375	None	None	None	None	0	0	0	0	0	R KNEE	M	Knee	0.05	234	43.6
1608	High	POS	1.38542	None	Staphylococcus_aureus_x000D_	Staphylococcus_aureus, 100%	None	1	1	3	2	6	KNEE	M	Knee	57.32	143468	95.2
1609	Low	POS	6.38264	None	None	Exiguobacterium_acetylicum, 77%	None	1	0	0	0	0	R KNEE	M	Knee	0.37	77	22.1
1610	Low	NEG	3.37986	None	None	None	None	0	0	0	0	0	R KNEE	M	Knee	0.16	17	29.4
1611	Low	NEG	6.37847	None	None	None	None	0	0	0	0	0	R KNEE	F	Knee	4.91	414	20.5
1612	Low	NEG	6.37847	None	None	None	None	0	0	0	0	0	L HIP JOINT	M	Hip	0.27	279	41.2
1613	Low	NEG	6.37708	None	None	None	None	0	0	0	0	0	L KNEE	F	Knee	0.01	49	16.3
1614	Low	NEG	6.37708	None	None	None	None	0	0	0	0	0	R KNEE	F	Knee	1.07	4	0
1615	Low	NEG	6.375	None	None	None	None	0	0	0	0	0	L KNEE	M	Knee	0.1	103	42.7
1616	Low	NEG	6.36806	None	None	None	None	0	0	0	0	0	L KNEE	F	Knee	0.65	51	41.2
1617	Low	NEG	6.36806	None	None	None	None	0	0	0	0	0	R KNEE	F	Knee	0.01	74	43.3
1618	Low	NEG	5.38333	None	None	None	None	0	0	0	0	0	R KNEE SYNOVIAL FL	M	Knee	0.83	16	12.4
1619	Low	NEG	5.38264	None	None	None	None	0	0	0	0	0	R KNEE	F	Knee	2.13	28	28.6
1620	Low	NEG	5.37917	None	None	None	None	0	0	0	0	0	R KNEE	M	Knee	0.61	202	64.8
1621	Low	NEG	5.37778	None	None	None	None	0	0	0	0	0	L KNEE	F	Knee	0.04	531	10.4
1622	Low	NEG	5.37708	None	None	None	None	0	0	0	0	0	L KNEE FLUID	M	Knee	1.43	1309	74.9
1623	Low	NEG	5.37431	None	None	None	None	0	0	0	0	0	R KNEE JOINT	F	Knee	0.18	228	28.5
1624	Low	NEG	5.36458	None	None	None	None	0	1	0	0	1	L KNEE	F	Knee	20.49	2730	69.8
1625	Low	NEG	2.32361	None	None	None	None	0	0	0	0	0	L KNEE	F	Knee	4.69	2786	57
1626	Low	NEG	2.32361	None	None	None	None	0	0	0	0	0	L KNEE	M	Knee	2.25	623	65.1
1627	Low	NEG	3.32153	None	None	None	None	0	1	0	0	1	R HIP #1 SYNOVIAL #2 SOFT TISSUE ASP	F	Hip	8.31	1302	11.8
1628	Low	NEG	3.32083	None	None	None	None	0	0	0	0	0	R KNEE	M	Knee	0.01	71	5.6
1629	Low	NEG	3.31944	None	None	None	None	0	0	0	0	0	R KNEE	M	Knee	0.41	151	12.6
1630	Low	NEG	5.49375	None	None	None	None	0	0	0	0	0	R KNEE	F	Knee	1.88	182	38.4
1631	Low	NEG	5.49306	None	None	None	None	0	0	0	0	0	R KNEE	F	Knee	0.04	13	30.8
1632	Low	NEG	5.49236	None	None	None	None	0	0	0	0	0	R KNEE	M	Knee	5.36	535	37.8
1633	Low	NEG	5.49167	None	None	None	None	0	0	0	0	0	R KNEE	F	Knee	0.3	113	30.1
1634	High	POS	1.49097	Tetracycline	Streptococcus_agalactiae	Streptococcus_agalactiae, 100%	None	1	1	3	0	4	L KNEE	M	Knee	11.07	609609	48.6
1635	Low	NEG	5.49097	None	None	None	None	0	0	0	0	0	L KNEE	M	Knee	3.88	30	20
1636	High	POS	1.48819	None	None	Staphylococcus_capitis, 80%	None	1	1	3	2	6	L KNEE	F	Knee	15.5	12309	96.7
1637	Low	NEG	4.3625	None	None	None	None	0	0	0	0	0	R KNEE	M	Knee	0.38	60	43.4
1638	Low	NEG	4.36319	None	None	None	None	0	0	0	0	0	L HIP	M	Hip	6.89	49	30.6
1639	Low	NEG	4.3625	None	None	None	None	0	0	0	0	0	R KNEE	M	Knee	0.01	67	35.8
1640	High	POS	4.36181	None	None	Proteus_mirabilis, 99%	None	1	1	3	2	6	L KNEE	F	Knee	40.23	11424	97.4
1641	Low	NEG	4.36181	None	None	None	None	0	0	0	0	0	LEFT KNEE JOINT	F	Knee	0.11	158	16.4
1642	Low	NEG	4.36042	None	None	None	None	0	0	0	0	0	R KNEE	F	Knee	0.19	58	15.6
1643	Low	NEG	4.36042	None	None	None	None	0	0	0	0	0	R KNEE	F	Knee	1.47	173	35.9
1644	Low	NEG	4.35972	None	None	None	None	0	0	0	0	0	R KNEE	M	Knee	0.73	80	22.5
1645	Low	POS	4.35972	None	None	Staphylococcus_epidermidis 53%; Corynebacterium_tuberculostearicum, 18%; Serratia_marcescens, 11%	None	3	1	0	0	1	R HIP JOINT/OUTER HIP	F	Hip	9.13	2079	75.1
1646	High	POS	4.35833	Beta-lactam	Klebsiella_pneumoniae	Klebsiella pneumoniae, 90%; Acinetobacter baumanni, 5%; Staphylococcus epidermidis 2%	None	3	0	3	2	5	L KNEE	M	Knee	4.14	42728	94.6
1647	Low	NEG	4.35833	None	None	None	None	0	0	0	0	0	L KNEE	M	Knee	0.3	71	5.6
1648	High	POS	4.35694	None	None	Streptococcus_mutans, 76%	None	1	0	3	2	5	R HIP ASPIRATE	F	Hip	2.91	16898	91.7
1649	Low	NEG	6.38611	None	None	None	None	0	0	0	0	0	L KNEE	M	Knee	0.09	34	5.9
1650	High	POS	3.38681	None	None	Pseudomonas_aeruginosa, 72%	None	1	1	3	2	6	R KNEE	M	Knee	6.99	15099	92.6
1651	Low	NEG	6.38611	None	None	None	None	0	0	0	0	0	R HIP	F	Hip	6.69	521	29
1652	Low	NEG	6.38472	None	None	None	None	0	0	0	0	0	L HIP	F	Hip	0.1	198	13.1
1653	Low	NEG	6.38472	None	None	None	None	0	1	0	0	1	L KNEE JOINT	M	Knee	8.48	1112	75.3
1654	Low	NEG	6.38403	None	None	None	None	0	0	0	0	0	L KNEE	M	Knee	0.23	1262	56.9
1655	High	POS	3.38333	None	None	Staphylococcus_epidermidis 98%	None	1	1	3	2	6	R KNEE	F	Knee	15.13	39172	96.4
1656	Low	NEG	6.38264	None	None	None	None	0	0	0	0	0	R KNEE FLUID	F	Knee	1.36	2331	44.2
1657	High	POS	3.38194	None	None	Staphylococcus_epidermidis 62%; Staphylococcus_lugdunensis, 33%	None	2	1	3	2	6	R KNEE	M	Knee	29.02	9800	96
1658	High	POS	3.38194	None	None	Staphylococcus_epidermidis 62%; Staphylococcus_lugdunensis, 34%	None	2	1	3	2	6	R HIP	M	Hip	27.78	12369	97
1659	Low	NEG	6.38194	None	None	None	None	0	0	0	0	0	L KNEE	M	Knee	0.01	232	7.3
1660	Low	NEG	6.38056	None	None	None	None	0	0	0	0	0	R KNEE	M	Knee	0.01	19	15.8
1661	Low	NEG	6.37986	None	None	None	None	0	0	0	0	0	L KNEE	M	Knee	0.05	62	17.8
1662	Low	NEG	5.35278	None	None	None	None	0	0	0	0	0	R KNEE SYNOVIAL FL	F	Knee	0.76	294	21.4
1663	Low	NEG	5.35139	None	None	None	None	0	0	0	0	0	R KNEE ASPIRATION	F	Knee	0.9	301	18.6
1664	Low	NEG	5.35139	None	None	None	None	0	0	0	0	0	L KNEE ASPIRATION	F	Knee	0.91	322	26.1
1665	Low	NEG	5.35069	None	None	None	None	0	0	0	0	0	R KNEE	M	Knee	0.08	103	35.9
1666	Low	NEG	5.35	None	None	None	None	0	0	0	0	0	R KNEE	F	Knee	0.32	38	39.5
1667	Low	NEG	5.34861	None	None	None	None	0	0	0	0	0	L KNEE JOINT FLUID	F	Knee	0.06	119	35.3
1668	Low	NEG	5.34792	None	None	None	None	0	0	0	0	0	R KNEE	M	Knee	0.65	1143	18.5
1669	Low	NEG	5.34722	None	None	None	None	0	0	0	0	0	L KNEE	F	Knee	0.09	77	9.1
1670	High	NEG	5.34653	None	None	None	None	0	1	3	0	4	L HIP	M	Hip	13.84	12516	73.5
1671	High	NEG	5.34583	None	None	None	None	0	0	3	2	5	L KNEE	M	Knee	0.35	8848	89.9
1672	High	POS	5.34514	None	None	Methylobacterium_populi, 50%; Brevundimonas_halotolerans, 48%	None	2	1	3	2	6	R KNEE	F	Knee	7.88	4596	85.6
1673	Low	NEG	6.49375	None	None	None	None	0	1	0	0	1	R KNEE SYNOVIAL FLUID	M	Knee	7.44	545	78.6
1674	Low	NEG	2.49236	None	None	None	None	0	0	0	0	0	R KNEE	F	Knee	1.63	1729	53.4
1675	High	POS	1.32153	None	None	Staphylococcus_lugdunensis, 100%	None	1	1	3	2	6	L KNEE	M	Knee	21.78	8323	95.4
1676	Low	NEG	6.32014	None	None	None	None	0	0	0	0	0	L KNEE	F	Knee	1.46	116	12.1
1677	High	POS	6.32014	None	None	Serratia_marcescens, 98%	None	1	1	3	2	6	RT KNEE	M	Knee	33.73	49413	95
1678	Low	NEG	2.31944	None	None	None	None	0	0	0	0	0	R KNEE JOINT FLUID SWAB	M	Knee	0.01	190	7.3
1679	Low	NEG	6.31736	None	None	None	None	0	0	3	0	3	L KNEE SWAB	M	Knee	0.04	609609	67.1
1680	Low	NEG	5.33681	None	None	None	None	0	0	0	0	0	L KNEE	F	Knee	4.04	595	28.2
1681	Low	NEG	5.33542	None	None	None	None	0	0	0	0	0	R KNEE	M	Knee	0.02	289	38.1
1682	Low	NEG	5.33403	None	None	None	None	0	0	0	0	0	R KNEE	M	Knee	0.01	1988	23.6
1683	Low	NEG	7.35486	None	None	None	None	0	0	0	0	0	RIGHT TKA	M	Knee	2.26	82	36.6
1684	High	POS	7.35347	None	None	None	Candida_glabrata, 99%	1	1	3	0	4	R KNEE	M	Knee	17.75	7658	78.6
1685	Low	NEG	7.35208	None	None	None	None	0	0	0	0	0	L KNEE	F	Knee	0.47	159	49.1
1686	Low	NEG	7.35139	None	None	None	None	0	0	0	0	0	L KNEE	F	Knee	0.01	58	22.4
1687	Low	NEG	7.35139	None	None	None	None	0	0	0	0	0	L KNEE	M	Knee	5.37	419	41.3
1688	High	POS	4.34861	None	None	Enterococcus_faecalis, 88%	None	1	1	3	2	6	L KNEE JOINT	F	Knee	13.26	32823	95.6
1689	Low	NEG	7.34722	None	None	None	None	0	0	0	0	0	L KNEE	F	Knee	0.47	82	18.3
1690	High	POS	4.34653	None	None	Staphylococcus_epidermidis 86%	None	1	1	3	2	6	KNEE FL	F	Knee	37.58	5831	94.8
1691	Low	NEG	6.34653	None	None	None	None	0	0	0	0	0	L KNEE	F	Knee	0.01	33	15.1
1692	High	POS	3.34583	None	None	Klebsiella_pneumoniae, 83%	None	1	1	3	2	6	R KNEE	F	Knee	24.89	42063	93.2
1693	Low	NEG	6.34514	None	None	None	None	0	1	0	0	1	R KNEE	M	Knee	23.87	1211	78
1694	Low	NEG	6.34514	None	None	None	None	0	0	0	0	0	L KNEE	M	Knee	0.04	354	9
1695	Low	NEG	6.34306	None	None	None	None	0	0	0	0	0	R KNEE	M	Knee	0.01	95	13.7
1696	Low	NEG	6.34306	None	None	None	None	0	0	0	0	0	R KNEE	M	Knee	3.21	1246	51.1
1697	High	POS	1.41667	None	Staphylococcus_aureus_x000D_	Staphylococcus_aureus, 100%	None	1	1	3	2	6	LEFT KNEE	M	Knee	26.59	41853	86.4
1698	High	POS	1.41667	Methicillin, Aminoglycoside	None	Staphylococcus_epidermidis 100%	None	1	1	3	2	6	R KNEE	M	Knee	15.59	4081	95.2
1699	Low	NEG	5.41458	None	None	None	None	0	0	0	0	0	R KNEE	F	Knee	1.39	59	37.3
1700	Low	NEG	5.41319	None	None	None	None	0	0	0	0	0	L KNEE	F	Knee	1.94	17	47.1
1701	High	NEG	5.4125	None	None	None	None	0	1	3	2	6	R KNEE SYN FLUID	M	Knee	29.57	3591	91
1702	Low	NEG	2.41181	None	None	None	None	0	0	0	0	0	R KNEE	M	Knee	0.69	84	17.8
1703	Low	NEG	5.41181	None	None	None	None	0	0	0	0	0	L KNEE	M	Knee	3.38	148	24.3
1704	High	NEG	5.41042	None	None	None	None	0	1	3	2	6	L KNEE	F	Knee	11.87	9009	86.7
1705	Low	NEG	5.40972	None	None	None	None	0	0	0	2	2	L HIP	F	Hip	0.01	185	89.2
1706	Low	NEG	5.40972	None	None	None	None	0	0	0	0	0	L KNEE	F	Knee	0.25	521	20.3
1707	Low	NEG	5.40903	None	None	None	None	0	0	0	0	0	L KNEE	M	Knee	1.02	22	40.9
1708	Low	NEG	4.35694	None	None	None	None	0	0	0	0	0	L KNEE	M	Knee	0.26	217	32.2
1709	High	POS	4.35486	none	None	Cutibacterium_acnes, 80%	None	1	1	3	2	6	R KNEE	F	Knee	17.17	16296	95.7
1710	Low	NEG	4.35486	None	None	None	None	0	0	0	0	0	R KNEE ASPIRATION	M	Knee	4.93	224	62.5
1711	Low	NEG	4.35347	None	None	None	None	0	0	0	0	0	L HIP	F	Hip	1.89	91	23.1
1712	Low	NEG	4.35278	None	None	None	None	0	1	0	2	3	R KNEE	M	Knee	26.8	1701	83.4
1713	High	POS	1.35069	Methicillin, Aminoglycoside	Staphylococcus_aureus_x000D_	Staphylococcus_aureus, 100%	None	1	1	3	2	6	R KNEE	M	Knee	77.59	35812	96
1714	Low	NEG	4.34722	None	None	None	None	0	0	0	0	0	L KNEE	F	Knee	3.37	266	42.1
1715	Low	NEG	6.34653	None	None	None	None	0	0	0	0	0	R HIP	F	Hip	1.07	140	40
1716	Low	NEG	3.34514	None	None	None	None	0	0	0	0	0	R KNEE	F	Knee	4.28	267	52.1
1717	Low	NEG	3.34514	None	None	None	None	0	0	3	0	3	R KNEE	F	Knee	0.25	14014	54.3
1718	High	POS	2.36806	None	None	Escherichia_coli, 75%; Staphylococcus_aureus, 5%	None	2	1	3	0	4	R HIP FL	F	Hip	46.83	8078	42.6
1719	Low	NEG	5.36528	None	None	None	None	0	0	0	0	0	R KNEE	F	Knee	0.42	2219	59.3
1720	Low	NEG	5.36458	None	None	None	None	0	0	0	0	0	R KNEE	M	Knee	0.03	45	26.7
1721	Low	NEG	5.36389	None	None	None	None	0	0	0	0	0	R KNEE	M	Knee	0.06	87	75.9
1722	Low	NEG	5.36319	None	None	None	None	0	0	0	0	0	KNEE	F	Knee	0.75	26	15.3
1723	Low	NEG	5.3625	None	None	None	None	0	0	0	0	0	R KNEE	F	Knee	1.24	27	14.9
1724	High	POS	2.36181	None	None	Staphylococcus_aureus, 77%	None	1	1	3	2	6	R KNEE	M	Knee	24.32	80871	91.2
1725	Low	NEG	5.36111	None	None	None	None	0	0	0	0	0	L KNEE JOINT FL	M	Knee	1.09	162	16
1726	Low	NEG	5.36111	None	None	None	None	0	0	0	0	0	R KNEE	F	Knee	0.77	1946	67.3
1727	Low	NEG	5.36042	None	None	None	None	0	0	0	0	0	R KNEE	M	Knee	0.01	160	68.8
1728	High	POS	2.36042	None	None	Streptococcus_gordonii, 99%	None	1	1	3	2	6	L KNEE	M	Knee	61.52	13594	88.5
1729	Low	NEG	5.35903	None	None	None	None	0	0	0	0	0	L KNEE	M	Knee	0.65	276	7.6
1730	Low	NEG	2.40417	None	None	None	None	0	0	0	0	0	R HIP	F	Hip	0.84	82	34.1
1731	Low	NEG	2.40347	None	None	None	None	0	0	0	0	0	L HIP	F	Hip	0.26	232	75.5
1732	Low	NEG	3.40139	None	None	None	None	0	0	0	0	0	R KNEE	F	Knee	3.66	171	11.7
1733	Low	NEG	3.40069	None	None	None	None	0	0	3	0	3	R trochanteric bursa	F	Hip	1.22	17619	1.2
1734	Low	NEG	2.4	None	None	None	None	0	0	0	0	0	R KNEE JOINT	M	Knee	0.97	28	21.4
1735	Low	NEG	2.4	None	None	None	None	0	0	0	0	0	R KNEE	M	Knee	0.02	294	76.2
1736	Low	NEG	2.39931	None	None	None	None	0	0	0	0	0	L KNEE	F	Knee	0.01	91	29.7
1737	Low	NEG	5.41875	None	None	None	None	0	0	0	0	0	R KNEE	F	Knee	0.8	42	19.1
1738	High	POS	5.41667	None	None	Staphylococcus_lugdunensis, 97%	None	1	1	3	2	6	L KNEE	M	Knee	24.94	11165	95.7
1739	Low	NEG	5.41528	None	None	None	None	0	0	0	0	0	R HIP	M	Hip	1.57	61	32.8
1740	Low	NEG	5.41667	None	None	None	None	0	0	0	0	0	L KNEE	F	Knee	1.85	71	64.8
1741	Low	NEG	2.41458	None	None	None	None	0	0	0	0	0	L KNEE	M	Knee	0.68	166	22.9
1742	Low	NEG	5.41458	None	None	None	None	0	0	0	0	0	R KNEE	F	Knee	0.14	302	37.5
1743	Low	NEG	4.4125	None	None	None	None	0	0	0	0	0	L HIP	F	Hip	1.41	304	12.8
1744	Low	NEG	4.41111	None	None	None	None	0	0	0	0	0	L KNEE	M	Knee	0.62	159	17
1745	Low	NEG	4.41042	None	None	None	None	0	0	0	0	0	L KNEE	F	Knee	0.01	629	55.5
1746	Low	NEG	4.40347	None	None	None	None	0	0	0	2	2	R KNEE	F	Knee	0.01	889	81.1
1747	Low	NEG	4.40833	None	None	None	None	0	0	0	0	0	L KNEE	F	Knee	3.36	1239	62.1
1748	Low	NEG	4.40764	None	None	None	None	0	0	0	0	0	R KNEE	M	Knee	2.36	46	17.4
1749	Low	NEG	4.40556	None	None	None	None	0	0	0	0	0	L KNEE	M	Knee	0.01	255	13.4
1750	Low	NEG	4.40347	None	None	None	None	0	0	0	0	0	KNEE	M	Knee	1.47	462	69.7
1751	Low	NEG	4.40347	None	None	None	None	0	0	0	0	0	L KNEE	M	Knee	0.01	85	25.9
1752	Low	NEG	4.39722	None	None	None	None	0	0	0	0	0	R KNEE	M	Knee	0.05	68	41.1
1753	Low	NEG	4.39514	None	None	None	None	0	0	0	0	0	L KNEE	M	Knee	3.77	97	9.3
1754	Low	NEG	4.39306	None	None	None	None	0	0	3	0	3	R KNEE	M	Knee	0.46	20790	10.5
1755	High	POS	4.39097	None	None	Staphylococcus_epidermidis 80%	None	1	1	3	2	6	L KNEE	F	Knee	15.02	25032	95.3
1756	Low	NEG	6.38264	None	None	None	None	0	0	0	0	0	R KNEE JOINT FLUID	M	Knee	0.05	301	8.6
1757	Low	NEG	6.38125	None	None	None	None	0	0	0	0	0	R KNEE	M	Knee	3.46	57	28
1758	Low	NEG	6.38333	None	None	None	None	0	0	0	0	0	LEFT KNEE	F	Knee	3.1	365	19.7
1759	Low	NEG	6.38125	None	None	None	None	0	0	0	0	0	L KNEE	M	Knee	0.02	28	28.5
1760	Low	NEG	6.37847	None	None	None	None	0	0	0	0	0	R KNEE	F	Knee	0.23	39	10.3
1761	Low	NEG	6.37847	None	None	None	None	0	0	0	0	0	R KNEE	M	Knee	0.02	68	14.7
1762	Low	NEG	6.37847	None	None	None	None	0	0	0	0	0	L KNEE	M	Knee	5.53	748	17
1763	Low	NEG	6.37847	None	None	None	None	0	0	0	0	0	L KNEE	F	Knee	0.16	299	12
1764	Low	NEG	5.37708	None	None	None	None	0	0	0	0	0	R KNEE FL	M	Knee	0.01	85	14.1
1765	Low	NEG	5.37639	None	None	None	None	0	0	3	0	3	L KNEE	M	Knee	6.5	3367	68
1766	Low	NEG	5.375	None	None	None	None	0	0	0	0	0	R KNEE	M	Knee	0.89	12	25
1767	High	POS	2.37431	Methicillin	None	Staphylococcus_aureus, 98%	None	1	1	3	2	6	L KNEE	M	Knee	16.36	24983	93.9
1768	Low	NEG	5.37292	None	None	None	None	0	0	0	0	0	R KNEE JOINT	F	Knee	0.01	13	7.7
1769	Low	NEG	5.37153	None	None	None	None	0	0	0	0	0	L HIP JOINT	F	Hip	0.01	158	27.2
1770	Low	NEG	5.37014	None	None	None	None	0	0	0	0	0	R KNEE	M	Knee	1.4	51	31.3
1771	High	NEG	5.37014	None	None	None	None	0	1	3	2	6	L HIP	M	Hip	59.58	3465	88.3
1772	Low	NEG	5.36944	None	None	None	None	0	0	0	0	0	R KNEE	F	Knee	0.13	261	10
1773	Low	NEG	5.36806	None	None	None	None	0	0	0	0	0	R KNEE	F	Knee	0.03	77	25.9
1774	Low	NEG	3.39722	None	None	None	None	0	0	0	0	0	L KNEE JOINT	M	Knee	0.05	5	20
1775	Low	POS	3.39306	None	None	Cutibacterium_acnes, 64%; Propionibacterium_namnetense, 8%; Staphylococcus_epidermidis 8%	None	3	0	0	0	0	R KNEE	M	Knee	0.03	464	0.7
1776	Low	NEG	3.39375	None	None	None	None	0	0	0	0	0	L KNEE	F	Knee	0.11	284	14.4
1777	Low	NEG	3.39097	None	None	None	None	0	0	0	0	0	R KNEE JOINT	F	Knee	1.24	8	12.5
1778	Low	NEG	3.38889	None	None	None	None	0	1	0	0	1	R KNEE	M	Knee	12.98	34	20.6
1779	Low	POS	3.3875	None	None	Staphylococcus_haemolyticus, 88%; Staphylococcus_epidermidis 9%	None	2	0	0	0	0	L KNEE JOINT	M	Knee	0.1	176	17
1780	Low	POS	3.38611	None	None	Staphylococcus_epidermidis 97%	None	1	0	0	0	0	L KNEE	M	Knee	0.01	255	0.8
1781	Low	NEG	5.43958	None	None	None	None	0	0	0	0	0	LEFT KNEE + TISSUE	M	Knee	0.07	111	41.4
1782	Low	NEG	5.4375	None	None	None	None	0	0	0	0	0	L KNEE	F	Knee	0.01	630	40
1783	Low	NEG	5.42847	None	None	None	None	0	0	0	0	0	L KNEE	M	Knee	1.08	18	11.1
1784	High	POS	5.43681	None	None	Lactococcus_lactis, 93%	None	1	0	3	2	5	L KNEE	F	Knee	2.36	9471	89.1
1785	Low	NEG	5.43611	None	None	None	None	0	0	0	0	0	L KNEE	F	Knee	0.82	114	12.3
1786	Low	NEG	5.43611	None	None	None	None	0	0	0	0	0	RIGHT KNEE	F	Knee	1.27	1820	75
1787	Low	NEG	5.43542	None	None	None	None	0	0	0	0	0	R KNEE	M	Knee	0.01	116	31.9
1788	Low	NEG	5.43472	None	None	None	None	0	0	0	0	0	L HIP	F	Hip	0.83	28	28.6
1789	High	POS	4.44167	None	None	Staphylococcus_lugdunensis, 77%	None	1	1	3	0	4	L KNEE	M	Knee	33.14	4137	76.8
1790	Low	NEG	4.44167	None	None	None	None	0	0	0	0	0	L HIP	M	Hip	2.44	217	71.4
1791	Low	NEG	4.44167	None	None	None	None	0	0	0	0	0	R KNEE	F	Knee	2.09	41	29.3
1792	Low	NEG	4.43958	None	None	None	None	0	0	0	0	0	L KNEE	M	Knee	1.15	128	46.1
1793	Low	NEG	4.44028	None	None	None	None	0	0	0	0	0	R HIP	F	Hip	0.01	168	8.3
1794	Low	NEG	4.42083	None	None	None	None	0	0	0	0	0	L KNEE	F	Knee	0.25	90	5.5
1795	Low	NEG	4.43542	None	None	None	None	0	0	0	0	0	R KNEE	F	Knee	0.02	31	6.5
1796	Low	NEG	6.38403	None	None	None	None	0	0	0	0	0	RIGHT KNEE	F	Knee	0.18	35	28.6
1797	Low	NEG	6.38264	None	None	None	None	0	0	0	0	0	R HIP	F	Hip	0.81	305	26.5
1798	Low	NEG	3.37778	None	None	None	None	0	0	0	0	0	L KNEE	F	Knee	1.78	151	52.4
1799	Low	NEG	5.40556	None	None	None	None	0	0	0	0	0	L KNEE SYNOVIAL	F	Knee	0.56	23	13
1800	High	POS	2.40486	None	None	Escherichia_coli, 96%	None	1	1	3	2	6	L KNEE	M	Knee	77.59	25802	96.7
1801	Low	NEG	5.40347	None	None	None	None	0	0	0	0	0	L KNEE	M	Knee	0.86	51	54.9
1802	Low	NEG	5.40208	None	None	None	None	0	1	0	0	1	R KNEE	M	Knee	11	71	53.5
1803	Low	NEG	3.41528	None	None	None	None	0	0	0	0	0	R KNEE	F	Knee	2.87	217	25.8
1804	Low	NEG	3.41319	None	None	None	None	0	0	0	0	0	L KNEE	F	Knee	0.01	176	29.6
1805	Low	POS	1.40903	None	Pseudomonas_aeruginosa	Pseudomonas_aeruginosa, 85%	None	1	0	0	0	0	L KNEE	F	Knee	0.12	7	14.3
1806	Low	NEG	3.40903	None	None	None	None	0	1	0	0	1	LEFT KNEE	M	Knee	8.16	493	33.9
1807	Low	NEG	5.42222	None	None	None	None	0	0	0	0	0	L HIP	M	Hip	0.06	187	12.3
1808	Low	NEG	5.42014	None	None	None	None	0	0	0	0	0	R KNEE	F	Knee	0.96	172	38.4
1809	Low	NEG	5.41944	None	None	None	None	0	0	0	0	0	L HIP	M	Hip	0.05	48	10.4
1810	High	NEG	5.41944	None	None	None	None	0	1	3	2	6	R KNEE	F	Knee	19.35	20867	94.3
1811	High	POS	1.41736	None	Staphylococcus_aureus_x000D_	Staphylococcus_aureus, 100%	None	1	1	3	2	6	R KNEE	M	Knee	20.22	183687	85.1
1812	Low	NEG	5.41667	None	None	None	None	0	0	0	0	0	L KNEE	F	Knee	0.22	303	26.1
1813	High	POS	1.425	None	None	Staphylococcus_aureus, 95%	None	1	0	3	2	5	R KNEE JOINT	M	Knee	0.87	121317	91.9
1814	Low	NEG	4.41875	None	None	None	None	0	0	0	0	0	LEFT KNEE	F	Knee	0.98	217	51.6
1815	Low	NEG	4.41597	None	None	None	None	0	0	0	0	0	L KNEE	M	Knee	0.04	107	15
1816	Low	NEG	4.41528	None	None	None	None	0	0	0	0	0	R KNEE	M	Knee	0.74	40	25
1817	High	POS	1.41667	None	Staphylococcus_aureus_x000D_	Staphylococcus_aureus, 100%	None	1	1	3	2	6	R KNEE	M	Knee	125.78	21091	92.6
1818	High	POS	4.41458	None	None	Corynebacterium_striatum, 62%; Staphylococcus_epidermidis 9%	None	2	0	3	2	5	L KNEE	F	Knee	4.15	10647	91.3
1819	High	POS	4.41181	None	None	Staphylococcus_lugdunensis, 73%	None	1	1	3	2	6	R HIP	M	Hip	17.61	20643	93.1
1820	Low	NEG	6.41181	None	Cutibacterium_acnes	None	None	1	0	0	0	0	L KNEE JOINT	F	Knee	2.07	502	15.1
1821	Low	NEG	6.41181	None	None	None	None	0	0	0	0	0	RIGHT KNEE FL	F	Knee	0.01	56	10.8
1822	High	POS	6.40764	None	None	None	Candida_glabrata, 100%	1	1	3	2	6	R KNEE	M	Knee	10.63	10969	93.7
1823	Low	NEG	6.40486	None	Cutibacterium_acnes	None	None	1	0	0	0	0	L KNEE	M	Knee	0.01	142	70.4
1824	High	NEG	3.40278	None	None	None	None	0	1	3	2	6	R HIP	M	Hip	28.84	8520	81.6
1825	High	NEG	3.40069	None	None	None	None	0	1	3	2	6	KNEE	M	Knee	13.18	4627	97
1826	High	POS	3.39931	None	None	Klebsiella_pneumoniae, 91%	None	1	1	3	2	6	L KNEE	M	Knee	27.13	19194	93
1827	Low	NEG	3.39792	None	None	None	None	0	0	0	0	0	L KNEE	M	Knee	2.21	350	70.3
1828	Low	NEG	6.39792	None	None	None	None	0	0	0	0	0	LT KNEE	M	Knee	0.44	75	13.3
1829	Low	NEG	6.39722	None	None	None	None	0	0	0	0	0	R HIP	F	Hip	4.21	688	74.3
1830	High	NEG	9.35556	None	None	None	None	0	1	3	2	6	L KNEE	F	Knee	23.96	14784	96.8
1831	Low	NEG	5.35556	None	None	None	None	0	0	0	0	0	R HIP	F	Hip	6.25	161	65.2
1832	Low	NEG	5.35556	None	None	None	None	0	0	0	0	0	LEFT KNEE FLUID	F	Knee	0.22	49	22.4
1833	High	POS	5.35139	None	None	Staphylococcus_lugdunensis, 77%	None	1	1	3	2	6	L HIP	M	Hip	22.26	13153	95.4
1834	Low	NEG	6.35139	None	None	None	None	0	0	0	0	0	LT KNEE	M	Knee	0.06	89	6.8
1835	Low	NEG	6.35069	None	None	None	None	0	0	0	0	0	L KNEE	F	Knee	0.03	132	6.1
1836	Low	NEG	6.35	None	None	None	None	0	0	0	0	0	R KNEE SYNOVIAL FL	F	Knee	1.03	118	14.4
1837	Low	NEG	6.34792	None	None	None	None	0	0	0	0	0	R KNEE SYNOVIAL FL	M	Knee	0.3	25	24
1838	Low	NEG	6.34722	None	None	None	None	0	0	0	0	0	R KNEE SYNOVIAL FL	F	Knee	0.04	254	2.8
1839	Low	NEG	6.34653	None	None	None	None	0	0	0	0	0	L KNEE	M	Knee	3.36	91	76.9
1840	Low	NEG	6.34653	None	None	None	None	0	0	0	0	0	R KNEE SYNOVIAL FL	F	Knee	0.01	335	10.2
1841	Low	NEG	6.34375	None	None	None	None	0	0	0	0	0	R KNEE	M	Knee	0.08	18	61.1
1842	Low	NEG	6.34375	None	None	None	None	0	0	0	0	0	L KNEE	F	Knee	0.09	110	31.8
1843	Low	NEG	6.40069	None	None	None	None	0	0	0	0	0	L KNEE	M	Knee	0.07	85	23.5
1844	Low	NEG	6.39722	None	None	None	None	0	0	0	0	0	L KNEE	F	Knee	0.2	12	25
1845	Low	NEG	6.39375	None	None	None	None	0	0	0	0	0	R KNEE	M	Knee	0.19	33	24.2
1846	Low	NEG	6.39028	None	None	None	None	0	0	0	0	0	R HIP	M	Hip	2.8	1729	36.1
1847	Low	NEG	6.38681	None	None	None	None	0	1	0	0	1	R KNEE	M	Knee	80.84	497	70.4
1848	Low	NEG	6.38819	None	None	None	None	0	0	0	0	0	L KNEE	F	Knee	0.76	260	67.7
1849	Low	NEG	5.41736	None	None	None	None	0	1	0	0	1	LEFT KNEE	M	Knee	7.14	121	11.6
1850	Low	NEG	5.41667	None	None	None	None	0	0	0	0	0	R HIP	F	Hip	0.2	1931	41.1
1851	Low	NEG	5.41458	None	None	None	None	0	0	0	0	0	R KNEE	M	Knee	0.26	51	7.9
1852	High	POS	5.41042	Methicilin, Aminoglycoside, Tetracycline	Staphylococcus_aureus_x000D_	Staphylococcus_aureus, 100%	None	1	1	3	0	4	L KNEE	M	Knee	39.18	59311	62.7
1853	Low	POS	1.35556	None	None	Staphylococcus_epidermidis 86%	None	1	0	0	0	0	L HIP	F	Hip	0.31	2275	8.6
1854	Low	NEG	6.35347	None	None	None	None	0	0	0	0	0	R KNEE	M	Knee	0.15	256	27.7
1855	High	POS	1.35417	None	None	Staphylococcus_epidermidis 97%	None	1	1	3	2	6	R KNEE JOINT	M	Knee	14.39	49700	95.8
1856	Low	NEG	4.35208	None	None	None	None	0	0	0	0	0	RIGHT KNEE	M	Knee	0.01	12	8.4
1857	Low	NEG	4.35208	None	None	None	None	0	0	0	0	0	R KNEE	M	Knee	0.22	18	5.5
1858	Low	NEG	4.35347	None	None	None	None	0	0	0	0	0	L KNEE	F	Knee	0.59	136	69.1
1859	High	POS	4.35	None	None	Staphylococcus_capitis, 99%	None	1	0	3	2	5	L HIP	M	Hip	0.41	10122	83.4
1860	Low	NEG	3.43819	None	None	None	None	0	0	0	0	0	R KNEE	F	Knee	0.32	24	4.2
1861	Low	NEG	3.4375	None	None	None	None	0	0	3	0	3	L KNEE	F	Knee	3.38	4522	70.4
1862	Low	NEG	3.4375	None	None	None	None	0	0	0	0	0	LEFT KNEE	M	Knee	1.25	124	19.3
1863	Low	NEG	3.43681	None	None	None	None	0	1	0	0	1	KNEE	F	Knee	24.57	1756	74.1
1864	Low	NEG	3.43611	None	None	None	None	0	0	0	0	0	LEFT KNEE	F	Knee	0.33	104	12.5
1865	Low	NEG	3.43472	None	None	None	None	0	0	0	0	0	R KNEE	F	Knee	0.14	224	6.2
1866	Low	NEG	6.43472	None	None	None	None	0	0	0	0	0	L KNEE	F	Knee	0.72	446	8.9
1867	Low	NEG	3.42917	None	None	None	None	0	0	0	0	0	RIGHT KNEE	M	Knee	0.22	143	11.9
1868	Low	NEG	3.42778	None	None	None	None	0	0	0	0	0	R KNEE	F	Knee	2.07	364	48.1
1869	High	POS	2.41667	None	None	Staphylococcus_epidermidis 94%	None	1	1	3	2	6	R KNEE	M	Knee	50.07	39697	97.6
1870	Low	NEG	5.41597	None	None	None	None	0	0	0	0	0	R KNEE	M	Knee	2.63	59	40.6
1871	Low	NEG	5.41319	None	None	None	None	0	0	0	0	0	LEFT KNEE	M	Knee	0.16	206	38.3
1872	Low	NEG	5.41319	None	None	None	None	0	0	0	0	0	R KNEE	M	Knee	1.08	37	10.8
1873	Low	NEG	5.41458	None	None	None	None	0	0	0	0	0	R KNEE PROSTHESIS	F	Knee	0.04	155	74.2
1874	Low	NEG	5.41181	None	None	None	None	0	0	0	0	0	R HIP	F	Hip	0.59	2723	68.2
1875	High	POS	2.40833	None	None	Staphylococcus_epidermidis 87%	None	1	1	3	2	6	R KNEE	F	Knee	11.49	9919	93.9
1876	Low	NEG	2.37917	None	None	None	None	0	0	0	0	0	R HIP	M	Hip	1.01	67	40.3
1877	Low	POS	1.37569	None	Staphylococcus_aureus_x000D_	Staphylococcus_aureus, 99%	None	1	1	0	0	1	L KNEE	F	Knee	106.31	1395	79.8
1878	Low	NEG	3.37639	None	None	None	None	0	0	0	0	0	L KNEE	M	Knee	0.25	21	9.5
1879	Low	NEG	3.37569	None	None	None	None	0	0	0	0	0	L KNEE	M	Knee	0.01	4	75
1880	Low	NEG	3.37431	None	None	None	None	0	0	0	0	0	R KNEE ASPIRATION	F	Knee	0.51	1701	66.3
1881	Low	NEG	3.37222	None	None	None	None	0	0	0	0	0	L KNEE	M	Knee	2.02	7	14.3
1882	Low	NEG	3.37222	None	None	None	None	0	0	0	0	0	L HIP	F	Hip	0.72	65	60
1883	Low	POS	3.37014	None	None	Staphylococcus_lugdunensis, 85%	None	1	0	0	0	0	L HIP	F	Hip	0.72	936	79.8
1884	Low	POS	2.39792	None	None	Propionibacterium_namnetense, 79%	None	1	1	0	0	1	R KNEE	M	Knee	8.8	54	31.5
1885	Low	NEG	5.39722	None	Cutibacterium_acnes	None	None	1	0	0	0	0	L KNEE	F	Knee	0.32	109	11.9
1886	Low	NEG	5.39653	None	None	None	None	0	0	0	0	0	L KNEE	F	Knee	0.04	80	26.2
1887	Low	NEG	5.39444	None	None	None	None	0	0	0	0	0	R KNEE	M	Knee	0.4	127	28.4
1888	Low	NEG	2.39375	None	None	None	None	0	0	0	0	0	R KNEE SWAB	M	Knee	4.67	386	57.5
1889	Low	NEG	5.39306	None	None	None	None	0	0	0	0	0	R HIP	F	Hip	0.03	287	31.7
1890	Low	NEG	2.39514	None	None	None	None	0	0	0	0	0	R KNEE FL	M	Knee	1.99	41	24.4
1891	Low	NEG	2.39167	None	None	None	None	0	1	0	0	1	R KNEE	M	Knee	13.89	24	4.1
1892	Low	NEG	4.39375	None	None	None	None	0	0	0	0	0	L KNEE	F	Knee	0.06	102	19.6
1893	Low	NEG	4.39306	None	None	None	None	0	1	0	0	1	R KNEE	F	Knee	8.4	25	40
1894	Low	NEG	4.39236	None	None	None	None	0	1	0	0	1	L KNEE JOINT	F	Knee	8.45	357	78.5
1895	High	POS	7.39167	None	None	Staphylococcus_epidermidis 78%; Cutibacterium_acnes, 3%	None	2	1	3	2	6	R KNEE	F	Knee	21.62	10745	96.9
1896	Low	NEG	4.39167	None	None	None	None	0	0	0	0	0	KNEE JOINT	M	Knee	0.01	105	13.3
1897	High	POS	3.38125	None	None	Cutibacterium_acnes, 71%	None	1	1	3	2	6	R KNEE ASPIRATE	M	Knee	13.02	32088	95.2
1898	Low	NEG	3.38125	None	None	None	None	0	0	0	0	0	L KNEE	M	Knee	1.64	269	48.3
1899	Low	NEG	6.37569	None	None	None	None	0	0	0	0	0	RT KNEE	F	Knee	2.08	71	25.4
1900	High	POS	3.37292	None	None	Staphylococcus_epidermidis 80%	None	1	1	3	2	6	R KNEE	M	Knee	17.37	10703	95.5
1901	Low	NEG	6.37153	None	None	None	None	0	0	0	0	0	R KNEE	M	Knee	0.03	796	3.4
1902	High	POS	3.37083	None	None	Corynebacterium_striatum, 65%; Staphylococcus_epidermidis 21%; Pseudomonas_aeruginosa, 8%	None	3	1	3	2	6	R KNEE	M	Knee	22.47	14763	95.3
1903	Low	NEG	3.37083	None	None	None	None	0	0	0	0	0	L KNEE	F	Knee	0.04	19	21.1
1904	High	POS	3.36944	None	None	Escherichia_coli, 85%	None	1	0	3	2	5	L KNEE	F	Knee	5.73	19565	94.3
1905	Low	NEG	6.36944	None	None	None	None	0	0	0	0	0	R KNEE	F	Knee	0.07	228	18
1906	Low	NEG	6.36875	None	None	None	None	0	0	0	0	0	L HIP	F	Hip	1.59	176	26.7
1907	Low	NEG	3.36736	None	None	None	None	0	0	0	0	0	L KNEE	M	Knee	0.29	94	12.7
1908	Low	NEG	6.36736	None	None	None	None	0	0	0	0	0	L HIP	F	Hip	0.34	261	19.5
1909	Low	NEG	5.38264	None	None	None	None	0	0	0	0	0	LEFT KNEE	M	Knee	0.12	934	19.3
1910	High	POS	2.37847	None	None	Staphylococcus_capitis, 92%	None	1	0	3	2	5	LEFT KNEE FLUID	F	Knee	6.11	14868	95.6
1911	High	POS	2.37361	Methicilin	None	Staphylococcus_epidermidis 96%	None	1	1	3	2	6	R KNEE	M	Knee	13.76	30821	94.9
1912	Low	NEG	5.37222	None	None	None	None	0	1	0	0	1	L KNEE	F	Knee	11.09	1743	76.7
1913	Low	NEG	5.37222	None	None	None	None	0	0	0	0	0	R KNEE FLUID	M	Knee	0.81	38	10.5
1914	Low	NEG	5.36736	None	None	None	None	0	0	0	0	0	L KNEE	F	Knee	0.01	117	44.5
1915	Low	NEG	5.36458	None	None	None	None	0	0	0	0	0	L HIP	M	Hip	0.01	2	0
1916	Low	NEG	3.42014	None	None	None	None	0	0	0	0	0	L KNEE	F	Knee	3.12	182	65.4
1917	Low	NEG	3.41875	None	None	None	None	0	1	0	0	1	R KNEE	M	Knee	13.35	651	35.5
1918	High	NEG	3.41875	None	None	None	None	0	1	3	2	6	L KNEE ASPIRATION	M	Knee	13	4795	93.8
1919	Low	NEG	3.41806	None	None	None	None	0	0	0	0	0	L KNEE	F	Knee	1.49	1330	32.1
1920	Low	NEG	3.41736	None	None	None	None	0	0	0	0	0	R KNEE JOINT	M	Knee	1.16	86	9.3
1921	Low	NEG	3.41528	None	None	None	None	0	0	0	0	0	L KNEE	F	Knee	0.26	574	35.5
1922	Low	NEG	3.41458	None	None	None	None	0	0	0	0	0	L KNEE	F	Knee	3.78	28	32.1
1923	Low	NEG	3.41389	None	None	None	None	0	0	0	0	0	R KNEE	M	Knee	0.02	8	37.5
1924	Low	NEG	3.41319	None	None	None	None	0	0	0	0	0	L KNEE	F	Knee	0.4	98	35.7
1925	Low	NEG	3.41319	None	None	None	None	0	0	0	0	0	L KNEE PREPATELLAR BURSA	M	Knee	0.02	11	36.3
1926	Low	NEG	5.39236	None	None	None	None	0	0	0	0	0	R HIP	M	Hip	0.09	602	21.6
1927	High	POS	1.38681	Methicilin	None	Staphylococcus_epidermidis 96%	None	1	0	3	2	5	R KNEE	F	Knee	1.95	10773	91
1928	Low	NEG	5.38542	None	None	None	None	0	0	0	0	0	R KNEE	M	Knee	1.39	525	65.4
1929	Low	NEG	5.38194	None	None	None	None	0	0	0	0	0	R KNEE	F	Knee	0.01	49	8.2
1930	High	POS	1.38125	None	None	Staphylococcus_epidermidis 84%; Stenotrophomonas_maltophilia, 2%	None	2	1	3	2	6	R KNEE	F	Knee	15.71	15281	96.3
1931	Low	NEG	5.37986	None	None	None	None	0	0	0	2	2	L KNEE JOINT	F	Knee	4.53	866	81.7
1932	Low	NEG	5.37292	None	None	None	None	0	0	0	0	0	LEFT KNEE	M	Knee	0.09	49	14.3
1933	High	POS	5.36944	None	None	Cutibacterium_acnes, 44%; Staphylococcus_aureus, 39%	None	2	1	3	2	6	L KNEE SYNOVIAL FL	F	Knee	25.58	7637	89.3
1934	Low	NEG	5.37014	None	None	None	None	0	0	3	0	3	R HIP	M	Hip	2	6090	71.7
1935	High	POS	4.34097	None	None	Cutibacterium_acnes, 25%; Escherichia_coli, 23%; Staphylococcus_epidermidis 22%; Enterobacter_cloacae, 7%; Enterococcus_faecalis, 7%	None	5	1	3	2	6	L KNEE	M	Knee	7.16	39550	97.3
1936	Low	NEG	7.34028	None	None	None	None	0	0	0	0	0	R KNEE	F	Knee	1.68	43	37.2
1937	High	NEG	7.33819	None	None	None	None	0	1	3	2	6	L KNEE	F	Knee	78	9744	84.5
1938	Low	NEG	7.33819	None	None	None	None	0	0	0	0	0	R KNEE	F	Knee	0.01	135	17.8
1939	Low	NEG	7.33542	None	None	None	None	0	0	0	0	0	L KNEE	F	Knee	4	39	38.5
1940	Low	NEG	7.33472	None	None	None	None	0	0	0	0	0	L KNEE	F	Knee	0.01	74	28.4
1941	Low	NEG	7.33264	None	None	None	None	0	0	0	0	0	R KNEE	M	Knee	0.14	157	47.1
1942	High	POS	4.32917	None	None	Staphylococcus_epidermidis 80%; Cutibacterium_acnes, 3%	None	2	1	3	2	6	R KNEE JOINT FLUID	F	Knee	57.78	9247	89.8
1943	Low	NEG	6.32847	None	None	None	None	0	0	0	0	0	L KNEE ASPIRATION	M	Knee	1.1	82	11
1944	Low	NEG	6.32708	None	None	None	None	0	0	0	0	0	L KNEE	M	Knee	1.34	414	51.4
1945	Low	NEG	6.32569	None	None	None	None	0	0	0	0	0	R KNEE	F	Knee	0.57	1484	24.5
1946	Low	NEG	6.325	None	None	None	None	0	1	0	0	1	R KNEE	M	Knee	8.53	622	54.2
1947	High	POS	2.37569	None	None	Staphylococcus_lugdunensis, 62%; Staphylococcus_capitis, 34%	None	2	1	3	2	6	L KNEE	F	Knee	48.22	26747	94.9
1948	High	NEG	5.375	None	None	None	None	0	1	3	2	6	R HIP	M	Hip	53.53	25375	87.4
1949	Low	NEG	5.37222	None	None	None	None	0	0	0	0	0	L KNEE	F	Knee	0.02	164	15.2
1950	High	POS	2.36875	None	None	Staphylococcus_capitis, 77%	None	1	1	3	2	6	L KNEE JOINT	F	Knee	45.83	19537	88.4
1951	High	POS	2.36806	None	None	Staphylococcus_epidermidis 83%	None	1	1	3	2	6	R HIP	F	Hip	7.4	14910	97
1952	Low	NEG	5.36806	None	None	None	None	0	0	0	0	0	L KNEE	M	Knee	0.26	41	17
1953	Low	NEG	5.36736	None	None	None	None	0	0	0	0	0	R KNEE	F	Knee	0.03	126	11.1
1954	Low	NEG	5.36667	None	None	None	None	0	0	0	0	0	R KNEE	F	Knee	0.02	2723	3.6
1955	High	POS	2.36528	None	None	Staphylococcus_aureus, 97%	None	1	1	3	2	6	RIGHT KNEE	M	Knee	61.53	10318	96.8
1956	High	POS	2.36389	None	Pseudomonas_aeruginosa	Pseudomonas_aeruginosa, 87%	None	1	0	3	2	5	L KNEE	F	Knee	2.2	7021	95.3
1957	High	POS	2.36389	None	None	Staphylococcus_epidermidis 75%; Cutibacterium_acnes, 2%	None	2	0	3	2	5	L TKA SYNOVIAL FL	M	Knee	6	14273	92.4
1958	Low	NEG	5.36528	None	None	None	None	0	0	0	0	0	R KNEE FLUID	M	Knee	4.99	168	28.6
1959	Low	NEG	5.36181	None	None	None	None	0	0	0	0	0	L KNEE	M	Knee	1.2	529	78.4
1960	Low	NEG	5.36181	None	None	None	None	0	0	0	0	0	R HIP	F	Hip	0.01	295	27.7
1961	High	POS	2.35972	None	None	Staphylococcus_lugdunensis, 82%	None	1	1	3	2	6	L KNEE FLUID	M	Knee	12.42	10276	84.1
1962	High	POS	2.35903	None	None	Cutibacterium_avidum, 86%	None	1	1	3	2	6	L HIP	F	Hip	12.77	5502	91.1
1963	Low	NEG	5.35972	None	None	None	None	0	0	0	0	0	L KNEE	M	Knee	0.11	42	16.6
1964	Low	NEG	5.35764	None	None	None	None	0	0	0	0	0	L KNEE	F	Knee	0.07	821	15.6
1965	Low	NEG	5.35694	None	None	None	None	0	0	0	0	0	L KNEE	M	Knee	0.05	530	59.1
1966	High	POS	2.35694	None	None	Staphylococcus_aureus, 98%	None	1	1	3	2	6	R KNEE	M	Knee	50.36	40838	95.4
1967	High	POS	1.33264	Methicillin	Staphylococcus_aureus_x000D_	Staphylococcus_aureus, 94%	None	1	1	3	0	4	R KNEE	M	Knee	42.64	173068	30
1968	High	POS	1.33125	None	None	Staphylococcus _lugdunensis, 93%	None	1	1	3	0	4	LEFT KNEE	F	Knee	88.74	17717	77.6
1969	Low	NEG	3.33056	None	None	None	None	0	0	0	0	0	R HIP JOINT	M	Hip	0.64	91	45
1970	Low	NEG	5.39444	None	None	None	None	0	0	0	0	0	R KNEE SYNOVIAL FLUID	M	Knee	0.11	136	55.1
1971	Low	NEG	5.39236	None	None	None	None	0	0	0	0	0	L KNEE	F	Knee	0.08	325	27.1
1972	Low	NEG	4.38958	None	None	None	None	0	1	0	0	1	R HIP	F	Hip	8.12	2107	56.4
1973	Low	NEG	4.38681	None	None	None	None	0	0	0	0	0	R KNEE	F	Knee	0.06	54	9.3
1974	Low	NEG	4.38611	None	None	None	None	0	0	0	0	0	R KNEE JOINT	F	Knee	0.56	111	21.6
1975	Low	NEG	4.38333	None	None	None	None	0	0	0	0	0	R HIP	M	Hip	0.32	58	36.2
1976	Low	NEG	4.38264	None	None	None	None	0	0	0	0	0	R KNEE	F	Knee	0.7	88	9.1
1977	Low	NEG	4.38264	None	None	None	None	0	0	0	0	0	R KNEE	M	Knee	0.32	31	41.9
1978	High	POS	4.38056	None	None	Staphylococcus_aureus, 89%	None	1	1	3	2	6	L HIP ASPIRATE	M	Hip	19.41	61663	96.3
1979	Low	NEG	4.38056	None	None	None	None	0	0	0	0	0	L KNEE	M	Knee	0.21	35	20
1980	High	POS	1.37986	None	None	Bacteriodes_fragilis, 100%	None	1	1	3	2	6	L KNEE	F	Knee	31.07	92526	97.9
1981	High	POS	3.32639	None	None	Staphylococcus_lugdunensis, 93%	None	1	1	3	2	6	L KNEE	M	Knee	22.97	36442	95.6
1982	Low	NEG	6.325	None	None	None	None	0	0	0	0	0	UNSPECIFIED SWAB- KNEE	F	Knee	4.83	178	20.2
1983	High	POS	3.32222	None	None	Staphylococcus_aureus, 82%	None	1	1	3	2	6	L KNEE	F	Knee	21.81	6097	85
1984	Low	NEG	6.32361	None	None	None	None	0	0	0	0	0	R KNEE	F	Knee	0.09	103	51.4
1985	Low	NEG	6.32361	None	None	None	None	0	0	0	0	0	L KNEE	F	Knee	5.26	966	57.2
1986	High	POS	3.32292	None	None	Corynebacterium_striatum, 93%	None	1	1	3	2	6	R KNEE	F	Knee	32.26	22393	97.3
1987	Low	NEG	6.32222	None	None	None	None	0	1	0	0	1	L HIP	M	Hip	11.28	5	20
1988	Low	NEG	6.32222	None	None	None	None	0	0	0	0	0	L KNEE	F	Knee	0.01	588	36.6
1989	Low	NEG	6.32153	None	None	None	None	0	0	0	0	0	L KNEE	M	Knee	1.36	68	25
1990	Low	NEG	6.32153	None	None	None	None	0	0	0	0	0	L KNEE	F	Knee	0.6	54	18.5
1991	Low	NEG	5.36319	None	None	None	None	0	0	0	0	0	L KNEE	F	Knee	0.13	72	22.2
1992	Low	NEG	5.35972	None	None	None	None	0	0	0	0	0	R KNEE	F	Knee	0.58	343	30.6
1993	Low	NEG	5.35903	None	None	None	None	0	0	0	0	0	L KNEE	F	Knee	0.01	133	15.8
1994	Low	NEG	5.35764	None	None	None	None	0	0	0	0	0	R HIP	M	Hip	0.18	11	27.3
1995	Low	NEG	5.35347	None	None	None	None	0	0	0	0	0	L KNEE	F	Knee	1.05	642	20.9
1996	Low	NEG	5.35208	None	None	None	None	0	0	0	0	0	LT KNEE	M	Knee	3.46	1946	5.8
1997	Low	NEG	5.35139	None	None	None	None	0	0	0	0	0	L KNEE	M	Knee	0.31	2254	69.6
1998	Low	NEG	5.35069	None	None	None	None	0	0	0	0	0	R KNEE	M	Knee	0.02	224	71.8
1999	Low	NEG	5.35069	None	None	None	None	0	0	0	0	0	R KNEE	M	Knee	2.01	836	28.8
[truncated: 12 more rows]

## Sheet: data dictionary
COLUMN FIELD	DESCRIPTION
Sample	Arbitrary sample ID number
Prob	Probability of PJI determined by cumulative biomarker score
NGSresult	Indicates a positive or negative result of NGS test
TAT	Days from sample collection to final delivered test result. In some cases, corrections or amendments may extend the final TAT.
Res_genes	For any antibiotic resistance associated genes with positive detections, antibiotic classes are listed for corresponding genes.
PCR	Lists species detected by limited panel of joint infection organisms tested for concurrently with NGS
NGS_Bacteria	Lists bacteria detected by NGS and the percent abundance they were reported in.
NGS_Fungi	Lists fungi detected by NGS and the percent abundance they were reported in.
Organisms	Number of organisms identified by NGS in the given sample
crp1	Indicates score for CRP defined by ICM 2018 thresholds
wbc1	Indicates score for WBC defined by ICM 2018 thresholds
pmn1	Indicates score for PMN defined by ICM 2018 thresholds
minor	Sum of points counted towards ICM 2018 minor criteria diagnosis by CRP, WBC, and PMN
Specimen_source	Descriptor for the specimen submitted for testing
Sex	Sex, as reported on requisition form when submitted for testing.
joint	Joint type, hip or knee
CRP	Laboratory value of C-reactive protein detected in sample (mg/L)
WBC	Laboratory value of white blood cell count detected in sample (cells/uL)
PMN	Laboratory value of polymorphonuclear leukocyte percentage detected in sample (%)
